# Supplementary material for: Investigation of the activation mode of vinylarene in Giri's Ni-catalyzed vinylarene intermolecular 1,2-alkylarylation cross-coupling: a theoretical study
Source: Royal Society of Chemistry journal article supplement (doi:10.1039/d3qo00851g), 2023-01-01
Supplement: d3qo00851g1.pdf [file d3qo00851g1.pdf]

## Supporting Information

# Investigation of the Activation Mode of Vinylarene in Giri's Ni-catalyzed Vinylarene Intermolecular 1,2-Alkylarylation Cross-coupling: A Theoretical Study

*Song Liu,<sup>\*,a,b,c</sup> Dianmin Zhang,<sup>\*,a</sup> Xiaoqing Zhang,<sup>a</sup> Yuyan Cheng<sup>a</sup> and Hong Deng<sup>a</sup>*

<sup>a</sup> Chongqing Key Laboratory of Environmental Materials and Remediation Technologies, College of Chemistry and Environmental Engineering, Chongqing University of Arts and Sciences, Chongqing, 402160, P. R. China

<sup>b</sup> School of Chemistry and Chemical Engineering, Chongqing University, Chongqing 400030, China

<sup>c</sup> Chongqing Precision Medical Industry Technology Research Institute, Chongqing 400084, P. R. China

## Table of Contents

1. The calculated structure and free energy for Ni(0)-catalysts. Page S2
2. The calculated free energy profiles of S<sub>N</sub>2 type C-I bond activation of cyclohexyl iodide. Page S2
3. The free energy profiles and structural information of concerted alkene-coupled radical transfer pathway from **CP2**. Page S3
4. The calculated free energy profiles for Paths I and II using *t*BuI as electrophile. Page S4
5. The free energy profiles and structural information of concerted alkene-coupled radical transfer pathway from **CP2'**. Page S4
6. The calculated free energy for the triplet migratory insertion of vinylarene from **CP9'-t**. Page S5
7. Completes reference for Gaussian 16. Page S5
8. B3-LYP and M06-L absolute calculation energies, enthalpies, and free energies. Page S6
9. B3-LYP geometries for all the optimized compounds and transition states. Page S8

### 1. The calculated structure and free energy for Ni(0)-catalysts.

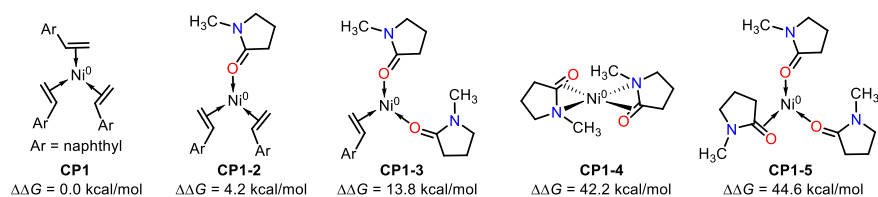

**Figure S1.** The calculated structure and free energy for Ni(0)-catalysts.

The calculated structure and free energy for other Ni(0)-catalysts, which is stabilized by solvent or olefin, are shown in **Figure S1**. The calculated results shown that the three olefin stabilized Ni(0)-catalyst **CP1** has the lowest free energy compared to the other Ni(0)-catalysts. So, in our theoretical study, **CP1** was set to be the active catalyst for the mechanistic study, and its free energy was set to be the baseline for the catalytic cycle.

### 2. The calculated free energy profiles of S<sub>N</sub>2 type C-I bond activation of cyclohexyl iodide.

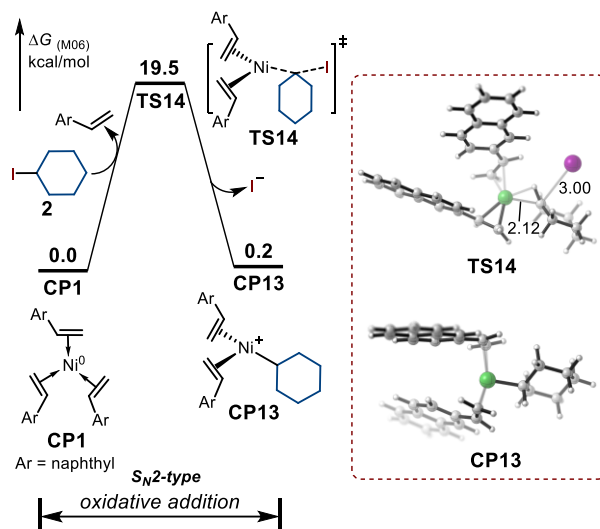

**Figure S2.** Free energy profiles and structural information of  $S_N2$  type C-I bond activation of cyclohexyl iodide.

The calculated free energy profiles and structural information of  $S_N2$  type C-I bond activation of cyclohexyl iodide are shown in Figure S2. As shown in Figure S2, the  $S_N2$  type C-I bond oxidation addition onto Ni(0) center occurs via **TS14** with an activation barrier of 19.5 kcal/mol, which is 0.8 kcal/mol higher than that of SET transition state **TS1**. The calculated results indicated that the  $S_N2$  type C-I bond activation of cyclohexyl iodide pathway is unfavorable.

### 3. The free energy profiles and structural information of concerted alkene-coupled radical transfer pathway from CP2.

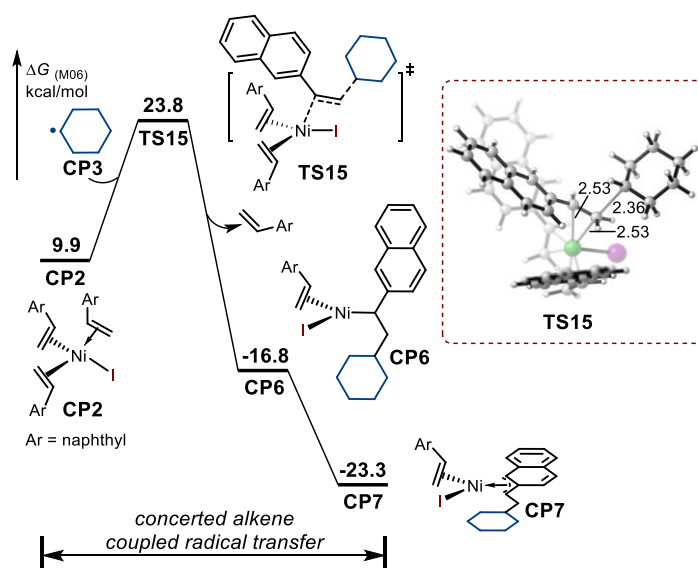

**Figure S3.** Free energy profiles and structural information of concerted alkene-coupled radical transfer pathway from CP2.

The concerted alkene-coupled radical transfer process from cyclohexyl radical, vinylarene, and **CP2** has also been calculated. As shown in Figure S3, the concerted alkene-coupled radical transfer process need overcome activation barrier of 13.9 kcal/mol to give alkyl-Ni(II) intermediate **CP6**. The calculated results also showed that the pathway was unfavorable due to the high free energy of **TS15**.

#### 4. The calculated free energy profiles for Paths I and II using *t*BuI as electrophile.

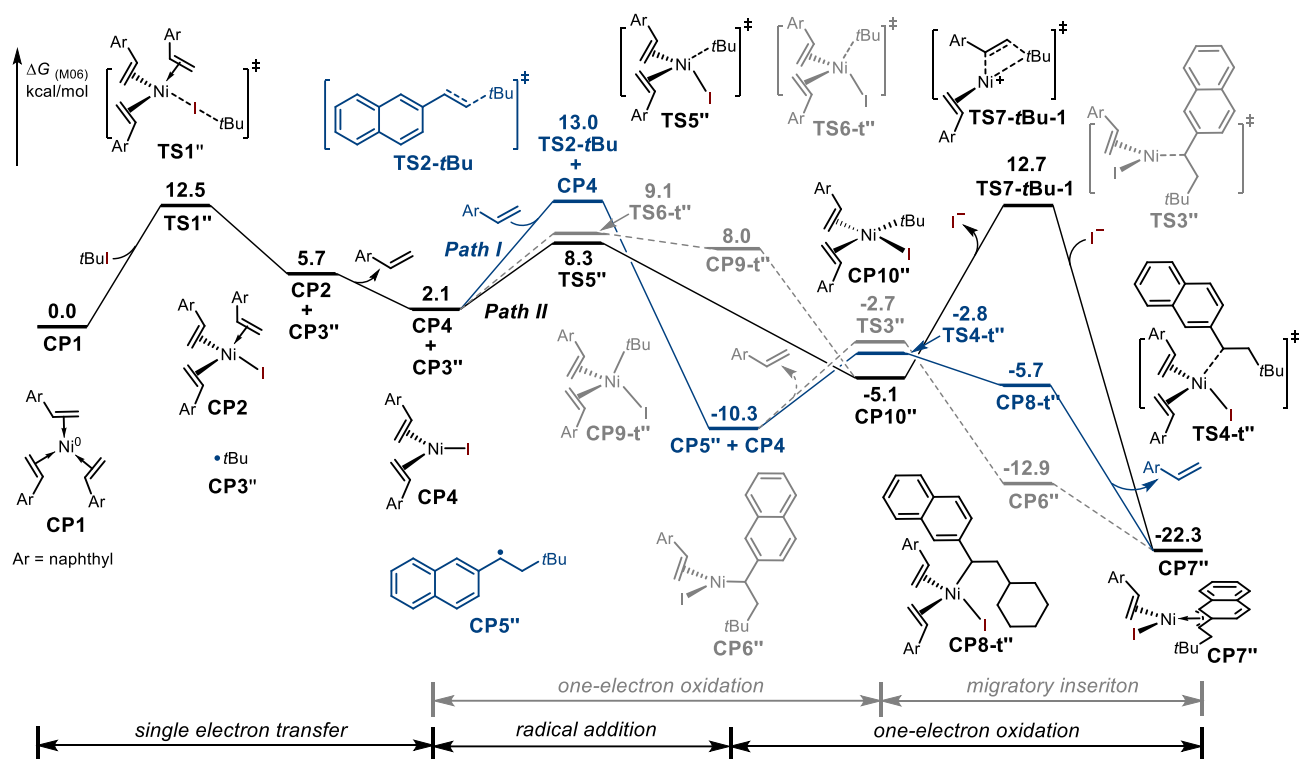

**Figure S4.** Free energy profiles and structural information for Paths I and II using *t*BuI as electrophile.

The whole free energy profiles for this 1,2-alkylarylation cross-coupling using *tert*-butyl iodide as electrophile are shown in Figure S4. As shown in Figure S4, when using NiBr<sub>2</sub> as catalyst, the energies of the **TS2''** and **TS7''** are similar, which indicated that Path I and Path II may occur simultaneously. So, in this case, there would be more side reactions occur, which led to low yields.

#### 5. The free energy profiles and structural information of concerted alkene-coupled radical transfer pathway from **CP2'**.

As shown in Figure S5, the concerted alkene-coupled radical transfer process from cyclohexyl radical, vinylarene, and **CP2'** occurred via transition state **TS15'** yielding alkyl-Ni(II) intermediate **CP6'**. In **TS15'**, the bond lengths of forming C-C and C-Ni were 2.31 and 2.16 Å, respectively. The coordination of the C=C bond of naphthol onto the Ni(II) center in **CP6'** generated the allyl-Ni(II) intermediate **CP7'**. The free energy of **TS15'** is 7.4 kcal/mol higher than that of **TS2**. The calculated results showed that the pathway was unfavorable due to the high free energy of **TS15'**.

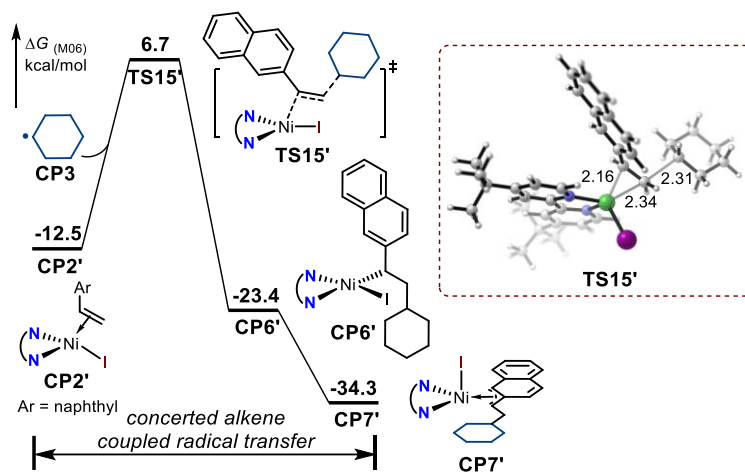

**Figure S5.** Free energy profiles and structural information of concerted alkene-coupled radical transfer pathway from **CP2'**.

### 6. The calculated free energy for the triplet migratory insertion of vinylarene from **CP9'-t**.

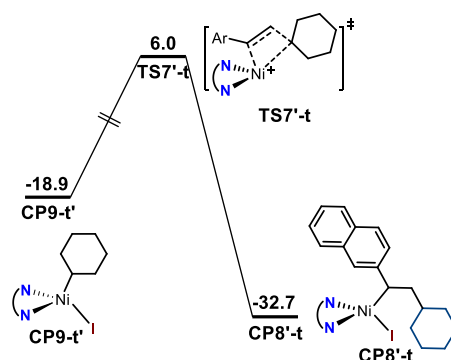

**Figure S6.** The calculated free energy for the triplet migratory insertion of vinylarene.

The calculated free energy for the triplet migratory insertion of vinylarene from **CP9'-t** is shown in **Figure S6**. The free energy of transition state **TS7'-t** is 6.7 kcal/mol higher than that of **TS2**, which indicated that the triplet migratory insertion of vinylarene from **CP9'-t** process is also unfavorable.

### 7. Complete reference for Gaussian 16

M. J. Frisch, G. W. Trucks, H. B. Schlegel, G. E. Scuseria, M. A. Robb, J. R. Cheeseman, G. Scalmani, V. Barone, G. A. Petersson, H. Nakatsuji, X. Li, M. Caricato, A. V. Marenich, J. Bloino, B. G. Janesko, R. Gomperts, B. Mennucci, H. P. Hratchian, J. V. Ortiz, A. F. Izmaylov, J. L. Sonnenberg, D. Williams-Young, F. Ding, F. Lipparini, F. Egidi, J. Goings, B. Peng, A. Petrone, T. Henderson, D. Ranasinghe, V. G. Zakrzewski, J. Gao, N. Rega, G. Zheng, W. Liang, M. Hada, M. Ehara, K. Toyota, R. Fukuda, J. Hasegawa, M. Ishida, T. Nakajima, Y. Honda, O. Kitao, H. Nakai, T. Vreven, K. Throssell, J. A. Montgomery, Jr., J. E. Peralta, F. Ogliaro, M. J. Bearpark, J. J. Heyd, E. N. Brothers, K. N. Kudin, V. N. Staroverov, T. A. Keith, R. Kobayashi, J. Normand, K. Raghavachari, A. P. Rendell, J. C. Burant, S. S.

Iyengar, J. Tomasi, M. Cossi, J. M. Millam, M. Klene, C. Adamo, R. Cammi, J. W. Ochterski, R. L. Martin, K. Morokuma, O. Farkas, J. B. Foresman, and D. J. Fox, Gaussian, Inc., Wallingford CT, 2016.

### 8. B3-LYP and M06-L absolute calculation energies, enthalpies, and free energies.

**Table S1.** B3-LYP and M06-L absolute calculation energies, enthalpies, and free energies.

| Geometry     | $E_{(\text{elec-B3-LYP})}^1$ | $H_{(\text{corr-B3-LYP})}^2$ | $G_{(\text{corr-B3-LYP})}^3$ | $E_{(\text{solv-M06-L})}^4$ | IF <sup>5</sup> |
|--------------|------------------------------|------------------------------|------------------------------|-----------------------------|-----------------|
| <b>CP1</b>   | -1559.224330                 | 0.579407                     | 0.480364                     | -1559.489121                | -               |
| <b>2</b>     | -246.662222                  | 0.169310                     | 0.128140                     | -246.682089                 | -               |
| <b>TS1</b>   | -1805.855227                 | 0.748566                     | 0.623145                     | -1806.156076                | -117.7          |
| <b>CP2</b>   | -1570.651486                 | 0.583447                     | 0.474036                     | -1570.906955                | -               |
| <b>CP3</b>   | -235.209762                  | 0.163298                     | 0.126560                     | -235.240515                 | -               |
| <b>CP4</b>   | -1107.369403                 | 0.390022                     | 0.304944                     | -1107.541254                | -               |
| naphthyl     | -463.283461                  | 0.190989                     | 0.146060                     | -463.348451                 | -               |
| <b>TS2</b>   | -698.487899                  | 0.355741                     | 0.291656                     | -698.589238                 | -230.4          |
| <b>CP5</b>   | -698.543045                  | 0.359213                     | 0.298374                     | -698.641934                 | -               |
| <b>TS3</b>   | -1342.618856                 | 0.557144                     | 0.456357                     | -1342.821285                | -28.9           |
| <b>CP6</b>   | -1342.631877                 | 0.559778                     | 0.462050                     | -1342.849102                | -               |
| <b>CP7</b>   | -1342.641906                 | 0.559815                     | 0.465036                     | -1342.862419                | -               |
| <b>TS4-t</b> | -1805.909232                 | 0.751053                     | 0.627958                     | -1806.195370                | -118.0          |
| <b>CP8-t</b> | -1805.915627                 | 0.752044                     | 0.622222                     | -1806.195829                | -               |
| <b>TS5</b>   | -1342.577259                 | 0.554948                     | 0.454690                     | -1342.793767                | -36.3           |
| <b>TS6-t</b> | -1342.577247                 | 0.554769                     | 0.452591                     | -1342.792385                | -45.1           |
| <b>CP9-t</b> | -1342.589902                 | 0.556806                     | 0.452850                     | -1342.799573                | -               |
| <b>CP10</b>  | -1342.593864                 | 0.557900                     | 0.461136                     | -1342.825804                | -               |
| <b>TS7</b>   | -1330.954567                 | 0.554724                     | 0.466750                     | -1331.235202                | -172.3          |
| <b>I</b>     | -11.474445                   | 0.002360                     | -0.016848                    | -11.556306                  | -               |
| PhZnI        | -308.664966                  | 0.099707                     | 0.053276                     | -308.267025                 | -               |
| <b>TS8</b>   | -1651.305798                 | 0.660491                     | 0.540088                     | -1651.136103                | -59.9           |
| <b>CP11</b>  | -1562.834368                 | 0.652135                     | 0.549881                     | -1563.095491                | -               |

|                         |              |          |           |              |        |
|-------------------------|--------------|----------|-----------|--------------|--------|
| ZnI <sub>2</sub>        | -88.469679   | 0.007284 | -0.029984 | -88.046873   | -      |
| <b>TS9</b>              | -1562.814009 | 0.650713 | 0.552558  | -1563.084068 | -271.6 |
| <b>3</b>                | -930.229276  | 0.458668 | 0.386452  | -930.363677  | -      |
| <b>TS10</b>             | -1342.553182 | 0.556144 | 0.460998  | -1342.786036 | -176.5 |
| <b>TS11</b>             | -1342.575381 | 0.555091 | 0.452582  | -1342.781989 | -224.6 |
| <b>TS2-<i>t</i>Bu</b>   | -621.073362  | 0.316764 | 0.254696  | -621.167034  | -309.9 |
| <b>TS7-<i>t</i>Bu-1</b> | -1253.529420 | 0.515691 | 0.430282  | -1253.803927 | -206.6 |
| <b>TS7-<i>t</i>Bu-2</b> | -1826.546957 | 0.616293 | 0.514234  | -1826.859062 | -215.4 |
| <b>TS12</b>             | -1651.257540 | 0.659011 | 0.536481  | -1651.089415 | -28.4  |
| <b>CP12</b>             | -1562.781510 | 0.650206 | 0.545572  | -1563.046550 | -      |
| <b>TS13</b>             | -1562.756620 | 0.647873 | 0.547196  | -1563.028550 | -254.9 |
| <b>4</b>                | -466.921530  | 0.263551 | 0.216119  | -466.986230  | -      |
| <b>CP1'</b>             | -1789.137524 | 0.813963 | 0.695209  | -1789.444043 | -      |
| bipyridyl               | -809.873859  | 0.404941 | 0.335919  | -810.003492  | -      |
| <b>TS1'</b>             | -1689.193402 | 0.768924 | 0.643910  | -1689.463988 | -150.3 |
| <b>CP2'</b>             | -1454.002165 | 0.604326 | 0.497365  | -1454.240984 | -      |
| <b>TS3'</b>             | -1689.250184 | 0.771843 | 0.649073  | -1689.516798 | -66.1  |
| <b>CP6'</b>             | -1689.257124 | 0.774675 | 0.656562  | -1689.531394 | -      |
| <b>CP7'</b>             | -1689.258116 | 0.774800 | 0.656383  | -1689.548537 | -      |
| <b>TS4'-<i>t</i></b>    | -1689.252633 | 0.771887 | 0.647769  | -1689.520683 | -53.7  |
| <b>CP8'-<i>t</i></b>    | -1689.269582 | 0.773589 | 0.650873  | -1689.540578 | -      |
| <b>CP4'</b>             | -990.707461  | 0.411707 | 0.329713  | -990.858073  | -      |
| <b>TS5'</b>             | -1225.918097 | 0.576084 | 0.471652  | -1226.107954 | -31.6  |
| <b>TS6'-<i>t</i></b>    | -1225.918532 | 0.575912 | 0.470282  | -1226.108160 | -106.4 |
| <b>CP9'-<i>t</i></b>    | -1225.946495 | 0.578203 | 0.478558  | -1226.143851 | -      |
| <b>CP10'</b>            | -1225.942401 | 0.579533 | 0.485540  | -1226.144994 | -      |
| <b>TS7'</b>             | -1677.589745 | 0.770352 | 0.660658  | -1677.909407 | -269.6 |
| <b>TS12'</b>            | -1534.612609 | 0.680385 | 0.562385  | -1534.429065 | -70.9  |
| <b>CP12'</b>            | -1446.131547 | 0.671896 | 0.569972  | -1446.376887 | -      |
| <b>TS13'</b>            | -1446.083783 | 0.669529 | 0.570265  | -1446.337496 | -288.5 |

|                |              |          |          |              |        |
|----------------|--------------|----------|----------|--------------|--------|
| <b>CP1-2</b>   | -1421.880592 | 0.535355 | 0.440079 | -1422.131863 | -      |
| <b>CP1-3</b>   | -1284.527497 | 0.491997 | 0.399823 | -1284.765886 | -      |
| <b>CP1-4</b>   | -821.181961  | 0.298438 | 0.236039 | -821.354451  | -      |
| <b>CP1-5</b>   | -1147.150463 | 0.448226 | 0.362437 | -1147.369003 | -      |
| <b>TS14</b>    | -1342.549463 | 0.554956 | 0.458508 | -1342.787614 | -176.6 |
| <b>CP13</b>    | -1330.975440 | 0.555226 | 0.464095 | -1331.250938 | -      |
| <b>TS15</b>    | -1805.853020 | 0.748650 | 0.620697 | -1806.142004 | -296.7 |
| <i>t</i> BuI   | -169.240784  | 0.130116 | 0.090766 | -169.251377  | -      |
| <b>TS1''</b>   | -1728.440175 | 0.709621 | 0.584859 | -1728.734380 | -159.3 |
| <b>CP3''</b>   | -157.795396  | 0.124605 | 0.087764 | -157.815114  | -      |
| <b>CP5''</b>   | -621.120698  | 0.320115 | 0.261149 | -621.210700  | -      |
| <b>TS3''</b>   | -1265.196352 | 0.518062 | 0.419288 | -1265.390695 | -32.4  |
| <b>CP6''</b>   | -1265.206701 | 0.519759 | 0.428371 | -1265.416011 | -      |
| <b>CP7''</b>   | -1265.218112 | 0.520636 | 0.427442 | -1265.429995 | -      |
| <b>TS4-t''</b> | -1728.485483 | 0.711646 | 0.589388 | -1728.763254 | -133.4 |
| <b>CP8-t''</b> | -1728.491442 | 0.712995 | 0.585995 | -1728.764501 | -      |
| <b>TS5''</b>   | -1265.162372 | 0.516319 | 0.417541 | -1265.371298 | -25.6  |
| <b>TS6-t''</b> | -1265.162256 | 0.516185 | 0.415317 | -1265.367727 | -61.7  |
| <b>CP9-t''</b> | -1265.170045 | 0.517799 | 0.415552 | -1265.369728 | -      |
| <b>CP10''</b>  | -801.888260  | 0.325093 | 0.253142 | -802.025851  | -      |
| <b>TS15'</b>   | -1689.197652 | 0.769320 | 0.643414 | -1689.470412 | -481.9 |
| <b>TS7'-t</b>  | -1689.175469 | 0.770242 | 0.648237 | -1689.453633 | -303.8 |

<sup>1</sup>The electronic energy calculated by B3-LYP. <sup>2</sup>The thermal correction to enthalpy calculated by B3-LYP. <sup>3</sup>The thermal correction to Gibbs free energy calculated by B3-LYP. <sup>4</sup>The electronic energy calculated by M06-L in N,N-dimethylacetamide solvent. <sup>5</sup>The B3-LYP calculated imaginary frequencies for the transition states.

## 9. B3-LYP geometries for all the optimized compounds and transition states.

|            |             |             |             |   |             |             |             |
|------------|-------------|-------------|-------------|---|-------------|-------------|-------------|
| <b>CP1</b> |             |             |             | C | -5.78279500 | -3.76857700 | 0.29105300  |
| Ni         | 0.86726100  | 0.22255900  | -0.47049400 | H | -1.51916800 | -3.04357800 | -1.94691100 |
| C          | -5.35747600 | -4.07272500 | -1.02544000 | H | -6.04677800 | -4.55312400 | -1.71466400 |
| C          | -4.07860600 | -3.76322600 | -1.43381300 | H | -3.75211500 | -3.99678500 | -2.44464900 |
| C          | -3.16235500 | -3.13384000 | -0.54740700 | C | -1.83897100 | -2.79628500 | -0.93586600 |
| C          | -3.59329300 | -2.82994000 | 0.78500800  | C | -2.66704400 | -2.20291000 | 1.66465500  |
| C          | -4.91732800 | -3.16095800 | 1.17541700  | H | -5.23738700 | -2.92970100 | 2.18900400  |



|   |             |             |             |
|---|-------------|-------------|-------------|
| H | -6.79371500 | -4.01858500 | 0.60122200  |
| C | -1.39478600 | -1.88835400 | 1.25548500  |
| C | -0.94624200 | -2.18180600 | -0.06938900 |
| H | -2.98598800 | -1.96709100 | 2.67746100  |
| H | -0.71928000 | -1.39822900 | 1.94974700  |
| C | 0.41869100  | -1.85376300 | -0.52684600 |
| H | 0.63343500  | -2.14341700 | -1.55567300 |
| C | 1.49527100  | -1.57381200 | 0.31014900  |
| H | 1.39158600  | -1.60974800 | 1.39196100  |
| H | 2.51196900  | -1.68427200 | -0.05557900 |
| C | -5.92668600 | 2.42364100  | 1.34628500  |
| C | -5.04627900 | 1.55574000  | 0.73872200  |
| C | -3.85515100 | 2.03823700  | 0.12996800  |
| C | -3.58372800 | 3.44471000  | 0.15859900  |
| C | -4.51109500 | 4.31208100  | 0.79143000  |
| C | -5.65750600 | 3.81433900  | 1.37312900  |
| H | -3.14506500 | 0.10648800  | -0.52324000 |
| H | -6.83411800 | 2.04387100  | 1.80818100  |
| H | -5.24801000 | 0.48739100  | 0.71639100  |
| C | -2.93001000 | 1.17190500  | -0.50494600 |
| C | -2.39069000 | 3.91432800  | -0.45931900 |
| H | -4.30249100 | 5.37939800  | 0.81027700  |
| H | -6.36047800 | 4.48847800  | 1.85508700  |
| C | -1.51286300 | 3.04883500  | -1.06347900 |
| C | -1.76477800 | 1.64283400  | -1.09452000 |
| H | -2.18474900 | 4.98236400  | -0.45276800 |
| H | -0.61869400 | 3.44159900  | -1.53711600 |
| C | -0.86074100 | 0.68115800  | -1.74575500 |
| H | -1.29883000 | -0.30035600 | -1.89507200 |
| C | 0.35238300  | 0.95099700  | -2.35221600 |
| H | 0.72060800  | 1.96357800  | -2.48167700 |
| H | 0.79669700  | 0.20813000  | -3.01139300 |
| C | 8.07296600  | -1.16199200 | 1.48688400  |
| C | 6.77190800  | -0.87440400 | 1.83685000  |
| C | 5.90853700  | -0.19307800 | 0.93613400  |
| C | 6.41755800  | 0.19182300  | -0.34642500 |
| C | 7.76182900  | -0.11908600 | -0.67741600 |
| C | 8.57404100  | -0.78142600 | 0.21782100  |
| H | 4.19039400  | -0.17058900 | 2.24471700  |
| H | 8.72147900  | -1.68357100 | 2.18578000  |
| H | 6.38652300  | -1.16626000 | 2.81116800  |
| C | 4.56375600  | 0.11966600  | 1.26424000  |
| C | 5.54494800  | 0.87397200  | -1.23942200 |
| H | 8.14239200  | 0.17533100  | -1.65296000 |
| H | 9.60212000  | -1.01373200 | -0.04647000 |
| C | 4.24862500  | 1.16139700  | -0.88993900 |
| C | 3.72467900  | 0.78909200  | 0.38638100  |
| H | 5.92304200  | 1.16760000  | -2.21627800 |
| H | 3.60690000  | 1.67668600  | -1.59806700 |
| C | 2.33857000  | 1.09851400  | 0.78905900  |
| H | 2.08434600  | 0.77644700  | 1.79700900  |
| C | 1.50464400  | 2.03144500  | 0.17182800  |
| H | 1.87192700  | 2.65902500  | -0.63624300 |
| H | 0.66023700  | 2.43980700  | 0.72320000  |

2

|   |             |             |             |
|---|-------------|-------------|-------------|
| I | 0.32919800  | -1.68434000 | 0.00000000  |
| C | -1.02085300 | 3.17692900  | 0.00000000  |
| C | -0.35897800 | 2.61475600  | 1.26645500  |
| C | -0.35897800 | 1.07114900  | 1.27066600  |
| C | 0.30654000  | 0.55077300  | 0.00000000  |
| C | -0.35897800 | 1.07114900  | -1.27066600 |
| C | -0.35897800 | 2.61475600  | -1.26645500 |

|   |             |            |             |
|---|-------------|------------|-------------|
| H | 0.15726100  | 0.69158000 | 2.15848000  |
| H | 0.67690900  | 2.97828100 | 1.32966700  |
| H | -0.87263200 | 2.97812700 | 2.16523400  |
| H | -2.08815500 | 2.91181800 | 0.00000000  |
| H | -0.97008500 | 4.27287700 | 0.00000000  |
| H | 1.37428700  | 0.78301800 | 0.00000000  |
| H | 0.15726100  | 0.69158000 | -2.15848000 |
| H | -1.39262100 | 0.70461600 | -1.31642400 |
| H | 0.67690900  | 2.97828100 | -1.32966700 |
| H | -0.87263200 | 2.97812700 | -2.16523400 |
| H | -1.39262100 | 0.70461600 | 1.31642400  |

TS1

|    |             |             |             |
|----|-------------|-------------|-------------|
| Ni | 0.78732000  | 0.28122900  | 0.67971600  |
| C  | -4.17047400 | -5.88243800 | -0.30641600 |
| C  | -2.92023400 | -5.30329700 | -0.28661600 |
| C  | -2.67706100 | -4.12525500 | 0.47082600  |
| C  | -3.75570000 | -3.54596100 | 1.21383500  |
| C  | -5.03110800 | -4.16512600 | 1.17179900  |
| C  | -5.23576100 | -5.30879100 | 0.42989900  |
| H  | -0.58132800 | -3.96283400 | -0.03133800 |
| H  | -4.34285200 | -6.78526400 | -0.88619000 |
| H  | -2.09933100 | -5.74435100 | -0.84744400 |
| C  | -1.40120100 | -3.50731900 | 0.52089100  |
| C  | -3.50110400 | -2.36569900 | 1.96761900  |
| H  | -5.84817400 | -3.72022800 | 1.73463900  |
| H  | -6.21696000 | -5.77511100 | 0.40715800  |
| C  | -2.25253700 | -1.79797100 | 2.00248200  |
| C  | -1.16353000 | -2.37046500 | 1.27832300  |
| H  | -4.32048400 | -1.91472100 | 2.52218300  |
| H  | -2.09169000 | -0.89689800 | 2.58689000  |
| C  | 0.21547400  | -1.87213200 | 1.37769500  |
| H  | 0.93912800  | -2.38540400 | 0.74860700  |
| C  | 0.71728200  | -1.05749000 | 2.36821500  |
| H  | 0.07594300  | -0.67369400 | 3.15801500  |
| H  | 1.78188400  | -1.06686700 | 2.56964900  |
| C  | -6.24683700 | -1.90384500 | -2.09617100 |
| C  | -4.87321300 | -2.00221100 | -2.11946700 |
| C  | -4.06054900 | -0.96073900 | -1.59496100 |
| C  | -4.69545800 | 0.19557600  | -1.03616400 |
| C  | -6.11288400 | 0.26624900  | -1.02568600 |
| C  | -6.87339300 | -0.75866900 | -1.54587400 |
| H  | -2.17183500 | -1.90620100 | -2.04348600 |
| H  | -6.85625500 | -2.70816700 | -2.49908000 |
| H  | -4.39122000 | -2.88506100 | -2.53163500 |
| C  | -2.64347400 | -1.02796200 | -1.61009100 |
| C  | -3.87256200 | 1.23074600  | -0.51323200 |
| H  | -6.59036900 | 1.14698700  | -0.60203500 |
| H  | -7.95807500 | -0.69201400 | -1.53553500 |
| C  | -2.50320100 | 1.13906100  | -0.54989600 |
| C  | -1.85557700 | -0.00301700 | -1.11205600 |
| H  | -4.34597700 | 2.10988900  | -0.08179400 |
| H  | -1.90617700 | 1.94901800  | -0.14335900 |
| C  | -0.38777000 | -0.08097300 | -1.24650400 |
| H  | 0.01437900  | -1.04826300 | -1.53947700 |
| C  | 0.43370100  | 1.02073000  | -1.32271100 |
| H  | 0.02013200  | 2.02325800  | -1.28943600 |
| H  | 1.44538600  | 0.91901700  | -1.69860400 |
| C  | -1.39612900 | 7.41174500  | -1.27097400 |
| C  | -0.43753100 | 6.42807700  | -1.16696400 |
| C  | -0.51880000 | 5.43952900  | -0.14894800 |
| C  | -1.61648100 | 5.48315700  | 0.77046800  |
| C  | -2.58735100 | 6.50912700  | 0.63719100  |

|   |             |             |             |
|---|-------------|-------------|-------------|
| C | -2.48099800 | 7.45342900  | -0.36111800 |
| H | 1.28661000  | 4.39298700  | -0.70892300 |
| H | -1.32310200 | 8.16167500  | -2.05377400 |
| H | 0.39609000  | 6.39458200  | -1.86432500 |
| C | 0.45046800  | 4.41224500  | -0.01260100 |
| C | -1.68587500 | 4.48905500  | 1.78644300  |
| H | -3.41850200 | 6.53911000  | 1.33793000  |
| H | -3.22993900 | 8.23508200  | -0.45377400 |
| C | -0.72913100 | 3.50964800  | 1.89310000  |
| C | 0.37320900  | 3.45204500  | 0.98570300  |
| H | -2.51574800 | 4.51722400  | 2.48889300  |
| H | -0.81361900 | 2.76840400  | 2.68211500  |
| C | 1.44017000  | 2.44124300  | 1.09651800  |
| H | 2.23011100  | 2.51134800  | 0.35257600  |
| C | 1.65243700  | 1.60770500  | 2.16998100  |
| H | 1.02031200  | 1.64500200  | 3.05238400  |
| H | 2.61096200  | 1.11430000  | 2.27990600  |
| I | 3.37678600  | -0.68803300 | -0.12688900 |
| C | 8.91056700  | -1.33067900 | -0.52222700 |
| C | 8.16228000  | -2.54077300 | 0.06010300  |
| C | 6.66928200  | -2.20185600 | 0.32254600  |
| C | 6.04575500  | -1.64856300 | -0.92485500 |
| C | 6.73634400  | -0.46094900 | -1.52791900 |
| C | 8.22947900  | -0.79704100 | -1.79286600 |
| H | 6.13163700  | -3.08691700 | 0.68006400  |
| H | 8.22367100  | -3.38114000 | -0.64605400 |
| H | 8.63801900  | -2.87480000 | 0.99219300  |
| H | 8.94256100  | -0.53020600 | 0.23217200  |
| H | 9.95346500  | -1.59908000 | -0.73692100 |
| H | 5.58342200  | -2.35724300 | -1.60835800 |
| H | 6.24508300  | -0.13963500 | -2.45290700 |
| H | 6.69450100  | 0.38837900  | -0.82995400 |
| H | 8.29429900  | -1.55493000 | -2.58661700 |
| H | 8.75227800  | 0.09519900  | -2.16343000 |
| H | 6.62403300  | -1.45198300 | 1.12622600  |

## CP2

|    |             |             |             |
|----|-------------|-------------|-------------|
| Ni | 0.83296700  | -1.72748400 | 0.32663100  |
| C  | -6.90603600 | -0.18693700 | -0.88132700 |
| C  | -5.78840100 | -0.99232800 | -0.85711200 |
| C  | -4.73601100 | -0.74566000 | 0.06638900  |
| C  | -4.85345400 | 0.35715700  | 0.97312000  |
| C  | -6.01697600 | 1.16690800  | 0.92358500  |
| C  | -7.02209300 | 0.90151800  | 0.01787400  |
| H  | -3.49932400 | -2.40766400 | -0.55161400 |
| H  | -7.70545400 | -0.38641500 | -1.58963600 |
| H  | -5.69794400 | -1.83141400 | -1.54286100 |
| C  | -3.57549800 | -1.55853800 | 0.12479400  |
| C  | -3.79158400 | 0.59771600  | 1.89060200  |
| H  | -6.10209500 | 2.00446100  | 1.61149700  |
| H  | -7.90955500 | 1.52789700  | -0.00943400 |
| C  | -2.68248100 | -0.20855400 | 1.92342000  |
| C  | -2.55587000 | -1.31968300 | 1.03528100  |
| H  | -3.87400900 | 1.43948500  | 2.57366100  |
| H  | -1.89273500 | -0.00077000 | 2.63890600  |
| C  | -1.44814700 | -2.27766100 | 1.10324500  |
| H  | -1.51412700 | -3.11101900 | 0.40657200  |
| C  | -0.45698600 | -2.34404100 | 2.04602900  |
| H  | -0.39071600 | -1.62634500 | 2.86043400  |
| H  | 0.09543700  | -3.26928300 | 2.16057900  |
| C  | -4.08714000 | 4.27455700  | -1.03518500 |
| C  | -3.63124900 | 3.01554400  | -1.35864100 |
| C  | -2.33029000 | 2.59249700  | -0.97221800 |

|   |             |             |             |
|---|-------------|-------------|-------------|
| C | -1.49967300 | 3.49817000  | -0.23563000 |
| C | -1.99994300 | 4.78678700  | 0.08534900  |
| C | -3.26465700 | 5.16906900  | -0.30702500 |
| H | -2.46566600 | 0.62658200  | -1.85581900 |
| H | -5.08318900 | 4.58604300  | -1.33770300 |
| H | -4.26439800 | 2.32525200  | -1.90993100 |
| C | -1.82793100 | 1.30578900  | -1.29588300 |
| C | -0.19908000 | 3.06519200  | 0.14380300  |
| H | -1.36549700 | 5.47123500  | 0.64389400  |
| H | -3.63563900 | 6.16006600  | -0.05959500 |
| C | 0.26397600  | 1.81857900  | -0.19722500 |
| C | -0.54975800 | 0.90776200  | -0.93787400 |
| H | 0.43632100  | 3.74400600  | 0.70813000  |
| H | 1.26550100  | 1.52511500  | 0.10140900  |
| C | -0.04207200 | -0.40132200 | -1.39014400 |
| H | -0.78601700 | -1.09348600 | -1.77958100 |
| C | 1.28487700  | -0.69884000 | -1.57253200 |
| H | 2.05514000  | 0.04641700  | -1.40047600 |
| H | 1.57408300  | -1.59224100 | -2.11454600 |
| C | 6.46161700  | 3.39593100  | -1.39351900 |
| C | 5.94717900  | 2.11882200  | -1.35246900 |
| C | 5.08678000  | 1.71728300  | -0.29497400 |
| C | 4.76228200  | 2.66306000  | -0.73094500 |
| C | 5.30864800  | 3.97016500  | 0.66057200  |
| C | 6.13997200  | 4.32994100  | -0.37847900 |
| H | 4.79749800  | -0.30565900 | -0.99819700 |
| H | 7.11820900  | 3.69200500  | -2.20684500 |
| H | 6.19289300  | 1.39969500  | -2.13004100 |
| C | 4.53903800  | 0.41075100  | -0.22091200 |
| C | 3.90203500  | 2.24787300  | 1.78662400  |
| H | 5.06153800  | 4.68534200  | 1.44159300  |
| H | 6.55314800  | 5.33380400  | -0.42240800 |
| C | 3.39067100  | 0.97449700  | 1.83140900  |
| C | 3.70331800  | 0.01907200  | 0.81549800  |
| H | 3.65784700  | 2.96004200  | 2.57146800  |
| H | 2.74452300  | 0.68946800  | 2.65621100  |
| C | 3.21191000  | -1.36622400 | 0.84820900  |
| H | 3.55196800  | -2.00391500 | 0.03464500  |
| C | 2.50796300  | -1.96439000 | 1.85484500  |
| H | 2.24256100  | -1.43661000 | 2.76685100  |
| H | 2.40239800  | -3.04304400 | 1.86080300  |
| I | 1.12537000  | -4.24872100 | -0.74257200 |

## CP3

|   |             |             |             |
|---|-------------|-------------|-------------|
| C | 0.00000000  | -1.41092000 | 0.27230300  |
| C | -1.26811800 | -0.71332500 | -0.24307800 |
| C | -1.29158800 | 0.77822800  | 0.15585400  |
| C | 0.00000000  | 1.46466500  | -0.16550000 |
| C | 1.29158800  | 0.77822800  | 0.15585400  |
| C | 1.26811800  | -0.71332500 | -0.24307800 |
| H | -2.13559300 | 1.29005800  | -0.32401200 |
| H | -1.29975100 | -0.79190600 | -1.33881400 |
| H | -2.16568100 | -1.21694900 | 0.13809000  |
| H | 0.00000000  | -1.40095400 | 1.37310400  |
| H | 0.00000000  | -2.46613900 | -0.03022100 |
| H | 0.00000000  | 2.53102200  | -0.37891600 |
| H | 2.13559300  | 1.29005800  | -0.32401200 |
| H | 1.48720900  | 0.83617900  | 1.24568500  |
| H | 1.29975100  | -0.79190600 | -1.33881400 |
| H | 2.16568100  | -1.21694900 | 0.13809000  |
| H | -1.48720900 | 0.83617900  | 1.24568500  |

## CP4

|    |             |             |             |
|----|-------------|-------------|-------------|
| Ni | -1.97094000 | -0.90409400 | 0.54519400  |
| C  | 5.46460700  | -2.16572200 | 0.53923700  |
| C  | 4.22853500  | -2.47646000 | 1.06155000  |
| C  | 3.05032400  | -2.32034300 | 0.28125500  |
| C  | 3.16865900  | -1.83719900 | -1.06281700 |
| C  | 4.45649900  | -1.52513800 | -1.57085900 |
| C  | 5.58017700  | -1.68470300 | -0.78840400 |
| H  | 1.67732900  | -2.98933100 | 1.80982300  |
| H  | 6.35794800  | -2.28928800 | 1.14512800  |
| H  | 4.13791300  | -2.84633400 | 2.08019700  |
| C  | 1.75979900  | -2.61884600 | 0.78934100  |
| C  | 1.98370900  | -1.68471600 | -1.83602400 |
| H  | 4.54228300  | -1.15772100 | -2.59058300 |
| H  | 6.56109900  | -1.44388100 | -1.18863500 |
| C  | 0.74910400  | -1.98823100 | -1.31846100 |
| C  | 0.61504500  | -2.46529400 | 0.02122300  |
| H  | 2.06809500  | -1.31327000 | -2.85422700 |
| H  | -0.13628200 | -1.84641000 | -1.93052000 |
| C  | -0.69336400 | -2.79250200 | 0.61158800  |
| H  | -0.67043400 | -3.04597200 | 1.67090300  |
| C  | -1.87702100 | -2.96544400 | -0.06017700 |
| H  | -1.94668100 | -2.90515900 | -1.14163700 |
| H  | -2.74754300 | -3.36775300 | 0.44947400  |
| C  | 3.58203900  | 3.70734600  | -0.57244700 |
| C  | 3.07863300  | 2.57170300  | 0.02215900  |
| C  | 1.71582900  | 2.50706900  | 0.42274100  |
| C  | 0.86963300  | 3.64071500  | 0.19420600  |
| C  | 1.41963200  | 4.79519500  | -0.42009200 |
| C  | 2.74579700  | 4.82930800  | -0.79437700 |
| H  | 1.81175200  | 0.49780900  | 1.20750300  |
| H  | 4.62477400  | 3.74699300  | -0.87547200 |
| H  | 3.71533500  | 1.70605800  | 0.18841100  |
| C  | 1.16574000  | 1.35657000  | 1.03947600  |
| C  | -0.49450600 | 3.56168000  | 0.59208100  |
| H  | 0.77570200  | 5.65406100  | -0.59324400 |
| H  | 3.15536400  | 5.71913800  | -1.26465700 |
| C  | -1.00072800 | 2.43284300  | 1.18517100  |
| C  | -0.16668700 | 1.29818900  | 1.42531800  |
| H  | -1.14147800 | 4.41696200  | 0.41399100  |
| H  | -2.04820200 | 2.40149800  | 1.46527800  |
| C  | -0.65936300 | 0.07356900  | 2.07474300  |
| H  | 0.11189600  | -0.66391800 | 2.28274900  |
| C  | -1.92701100 | -0.16354000 | 2.55637200  |
| H  | -2.70707300 | 0.59136800  | 2.54387800  |
| H  | -2.12197200 | -1.03830100 | 3.17091900  |
| I  | -3.84384900 | 0.01833500  | -0.89833100 |

naphthyl

|   |             |             |             |
|---|-------------|-------------|-------------|
| C | 3.07238300  | -1.03573200 | -0.00000300 |
| C | 1.78004300  | -1.51278500 | -0.00000200 |
| C | 0.67454400  | -0.61941900 | -0.00000300 |
| C | 0.92640000  | 0.79049900  | -0.00000500 |
| C | 2.26856100  | 1.25059500  | -0.00000600 |
| C | 3.31972900  | 0.35891500  | -0.00000500 |
| H | -0.85127800 | -2.14841700 | 0.00000000  |
| H | 3.90884000  | -1.72943900 | -0.00000200 |
| H | 1.58773900  | -2.58323600 | 0.00000000  |
| C | -0.66880500 | -1.07533800 | -0.00000200 |
| C | -0.18813600 | 1.67583000  | -0.00000600 |
| H | 2.45508300  | 2.32211700  | -0.00000800 |
| H | 4.34351800  | 0.72312100  | -0.00000600 |
| C | -1.47532600 | 1.20075400  | -0.00000500 |
| C | -1.74513600 | -0.20191900 | -0.00000100 |

|   |             |             |             |
|---|-------------|-------------|-------------|
| H | -0.00281600 | 2.74761600  | -0.00000900 |
| H | -2.30282200 | 1.90355000  | -0.00000800 |
| C | -3.11079000 | -0.74554000 | 0.00000300  |
| H | -3.16207100 | -1.83447400 | -0.00001800 |
| C | -4.26238100 | -0.06062700 | 0.00002900  |
| H | -4.30540800 | 1.02501800  | 0.00005200  |
| H | -5.21730100 | -0.57724900 | 0.00002800  |

TS2

|   |             |             |             |
|---|-------------|-------------|-------------|
| C | 5.38597500  | 1.16237300  | -0.51457000 |
| C | 4.20847100  | 1.49658500  | 0.11766400  |
| C | 3.14638400  | 0.55698500  | 0.22574400  |
| C | 3.32369000  | -0.74903900 | -0.33733400 |
| C | 4.54719700  | -1.06227700 | -0.98189500 |
| C | 5.55859100  | -0.12894700 | -1.07018100 |
| H | 1.79713800  | 1.86218600  | 1.29153800  |
| H | 6.18904000  | 1.89081700  | -0.58927000 |
| H | 4.07490300  | 2.48788000  | 0.54484900  |
| C | 1.92213100  | 0.86727800  | 0.86793000  |
| C | 2.25392500  | -1.68199000 | -0.22449400 |
| H | 4.67587300  | -2.05513200 | -1.40726500 |
| H | 6.49189000  | -0.38101200 | -1.56636800 |
| C | 1.08149600  | -1.35065600 | 0.40517400  |
| C | 0.88408700  | -0.05241500 | 0.97538000  |
| H | 2.38121800  | -2.67461300 | -0.65106700 |
| H | 0.28669700  | -2.08747300 | 0.47076100  |
| C | -0.34938600 | 0.32810900  | 1.65350100  |
| H | -0.38102200 | 1.35944000  | 2.00363000  |
| C | -1.45473700 | -0.44247200 | 1.84320600  |
| H | -1.46073000 | -1.50767900 | 1.63561100  |
| H | -2.27274600 | -0.07783400 | 2.45549900  |
| C | -5.69101500 | 0.54640100  | -0.82268800 |
| C | -4.49134100 | 1.45053700  | -1.15040700 |
| C | -3.33440000 | 1.22736600  | -0.14165700 |
| C | -2.98399600 | -0.23106300 | -0.06800600 |
| C | -4.12555500 | -1.15551100 | 0.24855500  |
| C | -5.28861500 | -0.93587400 | -0.75602500 |
| H | -2.46254900 | 1.83215800  | -0.41597800 |
| H | -4.13288000 | 1.22726200  | -2.16522300 |
| H | -4.79436000 | 2.50614200  | -1.14662700 |
| H | -6.11579700 | 0.84850400  | 0.14656200  |
| H | -6.48485800 | 0.68729700  | -1.56765300 |
| H | -2.23884500 | -0.59118300 | -0.77596000 |
| H | -3.80972600 | -2.20592400 | 0.23710600  |
| H | -4.50856400 | -0.94738300 | 1.26074900  |
| H | -4.96963000 | -1.27189100 | -1.75271600 |
| H | -6.14985000 | -1.55578900 | -0.47292800 |
| H | -3.67260500 | 1.58189600  | 0.84537500  |

CP5

|   |             |             |             |
|---|-------------|-------------|-------------|
| C | -5.35739800 | -0.93110400 | -0.54932200 |
| C | -4.16385800 | -1.43759100 | -0.08110500 |
| C | -3.03831600 | -0.58913800 | 0.12038500  |
| C | -3.17303100 | 0.80955800  | -0.17516600 |
| C | -4.40975000 | 1.29750700  | -0.65414300 |
| C | -5.48480700 | 0.44779700  | -0.83940700 |
| H | -1.70956100 | -2.13678900 | 0.81961000  |
| H | -6.20719700 | -1.59218200 | -0.69752700 |
| H | -4.06526100 | -2.49744500 | 0.14216500  |
| C | -1.80260500 | -1.07539700 | 0.59806700  |
| C | -2.03921800 | 1.65612200  | 0.03021600  |
| H | -4.50440500 | 2.35821800  | -0.87615100 |
| H | -6.43005600 | 0.83656700  | -1.20802600 |

|   |             |             |             |   |             |             |             |
|---|-------------|-------------|-------------|---|-------------|-------------|-------------|
| C | -0.85210400 | 1.16503900  | 0.49505800  | H | -1.68872200 | 3.39088400  | 2.78848100  |
| C | -0.68350400 | -0.23693400 | 0.80157400  | H | -2.95925900 | 5.19548700  | 1.66205000  |
| H | -2.13849500 | 2.71612700  | -0.19387500 | C | 1.25108800  | 1.19656800  | 1.00279400  |
| H | -0.01391100 | 1.84036500  | 0.63508600  | C | 1.55265000  | 1.49438700  | -0.37997900 |
| C | 0.52935000  | -0.77180400 | 1.28595400  | H | 0.07097300  | 1.63180600  | 2.71898600  |
| H | 0.55072000  | -1.84525900 | 1.46440700  | H | 1.79301300  | 0.40178600  | 1.50322500  |
| C | 1.79562400  | -0.00916200 | 1.53582700  | C | 2.52808900  | 0.78456100  | -1.12012900 |
| H | 1.56915000  | 1.00312800  | 1.89776400  | H | 2.65787600  | 1.09290200  | -2.15694500 |
| H | 2.35709700  | -0.50263300 | 2.34201800  | C | 3.50916000  | -0.21126300 | -0.57874300 |
| C | 5.36972100  | -0.20752400 | -1.07244400 | H | 3.05285500  | -0.82382200 | 0.20738800  |
| C | 4.17482900  | -1.11320800 | -1.40609700 | H | 3.79203800  | -0.90797200 | -1.38007300 |
| C | 3.21642900  | -1.24937300 | -0.21187800 | C | 7.78345300  | 0.70026200  | 0.14454300  |
| C | 2.73669000  | 0.11949800  | 0.30481900  | C | 6.91218000  | 1.78465600  | -0.50690500 |
| C | 3.94163700  | 1.02157000  | 0.63090100  | C | 5.60832800  | 1.19944400  | -1.07367000 |
| C | 4.90111200  | 1.16334200  | -0.56151200 | C | 4.81140200  | 0.42325700  | -0.00883400 |
| H | 2.35408700  | -1.86792500 | -0.49014900 | C | 5.69519400  | -0.65799500 | 0.64137400  |
| H | 3.62754400  | -0.68903800 | -2.26099800 | C | 6.99749400  | -0.07503000 | 1.21250300  |
| H | 4.52431600  | -2.10462600 | -1.72209800 | H | 4.99181500  | 2.00262300  | -1.49725400 |
| H | 5.98476500  | -0.69067400 | -0.29842900 | H | 6.66673800  | 2.55041800  | 0.24393800  |
| H | 6.01415500  | -0.08611500 | -1.95264200 | H | 7.47010600  | 2.29656300  | -1.30168400 |
| H | 2.16119800  | 0.59973800  | -0.50220200 | H | 8.12824700  | -0.00053800 | -0.63049100 |
| H | 3.59124000  | 2.01158000  | 0.95375900  | H | 8.68418200  | 1.14827500  | 0.58354400  |
| H | 4.48705100  | 0.59157400  | 1.48553100  | H | 4.51414000  | 1.13640800  | 0.77629300  |
| H | 4.38861800  | 1.69640300  | -1.37608700 | H | 5.13285900  | -1.17517600 | 1.42976200  |
| H | 5.76342500  | 1.78125700  | -0.27943100 | H | 5.93964600  | -1.41954300 | -0.11521200 |
| H | 3.73072800  | -1.77745900 | 0.60691100  | H | 6.75623200  | 0.60135100  | 2.04597100  |
|   |             |             |             | H | 7.61518600  | -0.87875600 | 1.63327300  |
|   |             |             |             | H | 5.84856000  | 0.51674200  | -1.90419700 |

### TS3

|    |             |             |             |
|----|-------------|-------------|-------------|
| Ni | -0.07398700 | -1.48932300 | -0.79033000 |
| C  | -6.59176800 | 1.03406100  | 1.26129600  |
| C  | -5.32442500 | 1.24246100  | 0.76412600  |
| C  | -4.68760000 | 0.25207100  | -0.03244200 |
| C  | -5.38286100 | -0.96939300 | -0.31102500 |
| C  | -6.68705000 | -1.15263200 | 0.21577800  |
| C  | -7.27912900 | -0.17343100 | 0.98452700  |
| H  | -2.86178500 | 1.36339100  | -0.34194400 |
| H  | -7.07042500 | 1.79613600  | 1.87015600  |
| H  | -4.78962400 | 2.16555600  | 0.97468600  |
| C  | -3.38532200 | 0.43512500  | -0.55902700 |
| C  | -4.73375900 | -1.95339500 | -1.10905600 |
| H  | -7.21298100 | -2.08059700 | 0.00459500  |
| H  | -8.27825400 | -0.32547700 | 1.38352800  |
| C  | -3.47167800 | -1.74785000 | -1.60699100 |
| C  | -2.76809000 | -0.53443400 | -1.33713300 |
| H  | -5.25749100 | -2.88209800 | -1.32195200 |
| H  | -3.00480600 | -2.51898600 | -2.21236000 |
| C  | -1.41684100 | -0.26645900 | -1.85328500 |
| H  | -1.04268900 | 0.73568600  | -1.64489300 |
| C  | -0.66728200 | -1.06029400 | -2.71117400 |
| H  | -1.05347900 | -1.97863600 | -3.14664200 |
| H  | 0.21242900  | -0.64186200 | -3.19487900 |
| I  | 0.69766200  | -3.08419700 | 0.95288200  |
| C  | -1.90969000 | 4.98183300  | -0.22555500 |
| C  | -0.93090300 | 4.30439500  | -0.92099400 |
| C  | -0.18433400 | 3.26070100  | -0.30237300 |
| C  | -0.46954100 | 2.93093500  | 1.06665600  |
| C  | -1.47940300 | 3.64473800  | 1.75193500  |
| C  | -2.18954400 | 4.65120300  | 1.12194700  |
| H  | 1.03119000  | 2.79777900  | -2.02398000 |
| H  | -2.47021000 | 5.77573400  | -0.71157500 |
| H  | -0.71500800 | 4.55907100  | -1.95600100 |
| C  | 0.81616300  | 2.53760500  | -0.98902900 |
| C  | 0.28438300  | 1.88363700  | 1.68288900  |

### CP6

|    |             |             |             |
|----|-------------|-------------|-------------|
| Ni | -0.27597800 | -1.45430100 | -0.15742200 |
| I  | -0.21675400 | -2.78797300 | 1.99128300  |
| C  | 1.46165100  | 3.69456300  | 3.32833400  |
| C  | 0.74546200  | 2.55241500  | 3.04548700  |
| C  | 0.19935000  | 2.34212200  | 1.74966300  |
| C  | 0.40611200  | 3.33716700  | 0.73940900  |
| C  | 1.14480400  | 4.50269000  | 1.06276100  |
| C  | 1.66179500  | 4.67836800  | 2.32944800  |
| H  | -0.70773300 | 0.43569100  | 2.20631100  |
| H  | 1.87680300  | 3.84494800  | 4.32089800  |
| H  | 0.59011400  | 1.79302300  | 3.80747600  |
| C  | -0.54930500 | 1.18206200  | 1.43240100  |
| C  | -0.14920600 | 3.11362800  | -0.55302900 |
| H  | 1.29802600  | 5.25823700  | 0.29567600  |
| H  | 2.22703000  | 5.57569500  | 2.56598900  |
| C  | -0.85695800 | 1.97293200  | -0.83764700 |
| C  | -1.08192300 | 0.96783800  | 0.15985900  |
| H  | -0.00999600 | 3.87366700  | -1.31879700 |
| H  | -1.27783800 | 1.84306200  | -1.82985600 |
| C  | -1.82712200 | -0.27838700 | -0.11594100 |
| H  | -2.25286300 | -0.70280900 | 0.79485400  |
| C  | -2.80749100 | -0.34571800 | -1.27380500 |
| H  | -2.32162000 | -0.07047400 | -2.21915700 |
| H  | -3.13966600 | -1.38559600 | -1.38804300 |
| C  | -7.03018200 | 0.96645700  | -1.07078400 |
| C  | -6.20629700 | 0.97948800  | 0.22496700  |
| C  | -4.93613800 | 0.12195000  | 0.10103300  |
| C  | -4.06795400 | 0.54369200  | -1.10068700 |
| C  | -4.90738000 | 0.53205100  | -2.39390800 |
| C  | -6.17531500 | 1.39184700  | -2.27370800 |
| H  | -4.35922800 | 0.18407800  | 1.03160600  |
| H  | -5.92018600 | 2.01520600  | 0.46111600  |
| H  | -6.81389600 | 0.62544500  | 1.06734100  |

|   |             |             |             |
|---|-------------|-------------|-------------|
| H | -7.41807600 | -0.04851900 | -1.24342000 |
| H | -7.90440800 | 1.62277900  | -0.97371300 |
| H | -3.73341300 | 1.57812300  | -0.92697500 |
| H | -4.29607600 | 0.87827600  | -3.23892200 |
| H | -5.19415900 | -0.50614300 | -2.62265000 |
| H | -5.88657800 | 2.44703800  | -2.15732800 |
| H | -6.75994700 | 1.32927100  | -3.20053800 |
| H | -5.22092700 | -0.93485100 | -0.01991600 |
| C | 5.96813400  | 1.80735100  | -1.39990700 |
| C | 4.62149000  | 1.68671700  | -1.65872300 |
| C | 3.97522200  | 0.42262400  | -1.57245600 |
| C | 4.74986700  | -0.72767600 | -1.20905900 |
| C | 6.13587900  | -0.56946000 | -0.94894000 |
| C | 6.73279800  | 0.66895000  | -1.04209900 |
| H | 2.00837900  | 1.14087400  | -2.09955100 |
| H | 6.45111600  | 2.77827300  | -1.46798800 |
| H | 4.03123300  | 2.55842000  | -1.93078900 |
| C | 2.59335600  | 0.26317400  | -1.83426200 |
| C | 4.09514500  | -1.98710200 | -1.12626300 |
| H | 6.72021900  | -1.44378200 | -0.67257000 |
| H | 7.79473100  | 0.77794000  | -0.83969600 |
| C | 2.75345000  | -2.11282100 | -1.38890100 |
| C | 1.96749500  | -0.97524200 | -1.75327700 |
| H | 4.67760100  | -2.86258500 | -0.85029500 |
| H | 2.28894200  | -3.09084100 | -1.31836800 |
| C | 0.52552300  | -1.06744100 | -2.03293500 |
| H | 0.07900500  | -0.16346700 | -2.43767200 |
| C | -0.24010000 | -2.23347200 | -2.01935400 |
| H | 0.20659600  | -3.21381600 | -1.87167600 |
| H | -1.23081800 | -2.23873600 | -2.45958400 |

**CP7**

|    |             |             |             |
|----|-------------|-------------|-------------|
| Ni | 0.20177700  | 0.46799400  | -1.21009600 |
| I  | 0.30532700  | -1.67688700 | -2.58940600 |
| C  | -0.54511200 | 5.73516000  | -0.42509200 |
| C  | 0.13505400  | 4.63559100  | -0.91936900 |
| C  | 0.38565500  | 3.51284800  | -0.09821700 |
| C  | -0.06252100 | 3.53118600  | 1.25658800  |
| C  | -0.75415500 | 4.66568200  | 1.73681000  |
| C  | -0.99417400 | 5.74988200  | 0.91054200  |
| H  | 1.60917800  | 2.44599300  | -1.53697400 |
| H  | -0.73082200 | 6.59167300  | -1.06692000 |
| H  | 0.49022000  | 4.62683800  | -1.94729900 |
| C  | 1.09613400  | 2.35940300  | -0.57946400 |
| C  | 0.21730900  | 2.39401200  | 2.09079500  |
| H  | -1.09423500 | 4.67704500  | 2.76960700  |
| H  | -1.52686200 | 6.61644100  | 1.29175200  |
| C  | 0.90215100  | 1.30918500  | 1.62927500  |
| C  | 1.42016600  | 1.27446000  | 0.27807100  |
| H  | -0.13050400 | 2.41664700  | 3.12124000  |
| H  | 1.09686400  | 0.46782500  | 2.28531200  |
| C  | 2.00389300  | 0.12412200  | -0.35153000 |
| H  | 2.65433900  | 0.34364300  | -1.19858200 |
| C  | 2.34776400  | -1.13988300 | 0.40355600  |
| H  | 1.51561900  | -1.42836000 | 1.05844000  |
| H  | 2.45213000  | -1.95482400 | -0.32060800 |
| C  | 6.35350700  | -2.01968600 | 2.06895800  |
| C  | 6.17919200  | -0.73696200 | 1.24263900  |
| C  | 4.89727500  | -0.77751900 | 0.39497400  |
| C  | 3.64381100  | -1.04737800 | 1.24971200  |
| C  | 3.83357500  | -2.33325900 | 2.07857700  |
| C  | 5.11218200  | -2.29629600 | 2.93000000  |
| H  | 4.78876400  | 0.16651600  | -0.15365700 |

|   |             |             |             |
|---|-------------|-------------|-------------|
| H | 6.13482300  | 0.12698400  | 1.92279900  |
| H | 7.05150500  | -0.57838200 | 0.59558300  |
| H | 6.51808600  | -2.86845200 | 1.38855500  |
| H | 7.24802500  | -1.94784900 | 2.70111300  |
| H | 3.53665600  | -0.20737900 | 1.95611400  |
| H | 2.95660000  | -2.49619000 | 2.71995900  |
| H | 3.87833900  | -3.19263200 | 1.39242900  |
| H | 5.01771800  | -1.50775300 | 3.69178800  |
| H | 5.22821700  | -3.24215100 | 3.47476300  |
| H | 4.98647100  | -1.57041200 | -0.36361100 |
| C | -4.99139600 | -1.88970500 | 3.46624900  |
| C | -4.19113100 | -0.91325100 | 2.91591000  |
| C | -3.85905700 | -0.93897600 | 1.53387600  |
| C | -4.37104000 | -1.99889900 | 0.71685300  |
| C | -5.19307700 | -2.98904400 | 1.31389300  |
| C | -5.49668300 | -2.93732100 | 2.65758300  |
| H | -2.65494500 | 0.85446000  | 1.55634500  |
| H | -5.23859900 | -1.86031600 | 4.52392900  |
| H | -3.80167000 | -0.10680300 | 3.53311400  |
| C | -3.04073400 | 0.04978400  | 0.93376800  |
| C | -4.03526700 | -2.01342200 | -0.66622200 |
| H | -5.57980500 | -3.79329400 | 0.69260800  |
| H | -6.12649700 | -3.70273400 | 3.10278700  |
| C | -3.23887400 | -1.04263400 | -1.21829500 |
| C | -2.72050000 | 0.01911000  | -0.41662100 |
| H | -4.42077000 | -2.81711100 | -1.28861400 |
| H | -2.99026400 | -1.08848400 | -2.27203300 |
| C | -1.90249400 | 1.10984100  | -0.96630200 |
| H | -1.73738300 | 1.93287800  | -0.27432400 |
| C | -1.48612200 | 1.27803900  | -2.26688300 |
| H | -1.74782600 | 0.58443900  | -3.05670800 |
| H | -1.08744700 | 2.23852800  | -2.58150600 |

**TS4-t**

|    |             |             |             |
|----|-------------|-------------|-------------|
| Ni | 0.59990000  | -0.40539700 | -0.42533300 |
| C  | -5.66533700 | 4.05775700  | 0.19002600  |
| C  | -4.29869800 | 3.89331100  | 0.13848100  |
| C  | -3.72355000 | 2.80247700  | -0.56956200 |
| C  | -4.59017100 | 1.87342000  | -1.23256200 |
| C  | -5.99380000 | 2.07099500  | -1.16073100 |
| C  | -6.52146500 | 3.13854500  | -0.46532400 |
| H  | -1.66702600 | 3.32309600  | -0.15687300 |
| H  | -6.09255600 | 4.89604300  | 0.73354200  |
| H  | -3.63963600 | 4.59916200  | 0.63877000  |
| C  | -2.32113800 | 2.60309900  | -0.64594100 |
| C  | -4.00522300 | 0.77995800  | -1.93151100 |
| H  | -6.64789900 | 1.36351500  | -1.66454100 |
| H  | -7.59776600 | 3.28045700  | -0.41957800 |
| C  | -2.64420400 | 0.61343600  | -1.98820600 |
| C  | -1.76789100 | 1.54184500  | -1.34806400 |
| H  | -4.65953800 | 0.06190200  | -2.41942900 |
| H  | -2.22938700 | -0.24346100 | -2.50931200 |
| C  | -0.30304100 | 1.45073600  | -1.45569400 |
| H  | 0.24675900  | 2.20603800  | -0.89254800 |
| C  | 0.40321100  | 0.68111000  | -2.34423600 |
| H  | -0.08258200 | 0.00823100  | -3.04107200 |
| H  | 1.45253300  | 0.87461500  | -2.53196300 |
| C  | -7.05588000 | -1.68213900 | 1.37105500  |
| C  | -5.93339100 | -0.88405300 | 1.39481700  |
| C  | -4.63389700 | -1.46135400 | 1.40958800  |
| C  | -4.50670700 | -2.88856400 | 1.39654400  |
| C  | -5.68261500 | -3.68146200 | 1.37138300  |
| C  | -6.92940800 | -3.09296100 | 1.35986100  |

|              |             |             |             |   |             |             |             |
|--------------|-------------|-------------|-------------|---|-------------|-------------|-------------|
| H            | -3.55961200 | 0.41105400  | 1.44610800  | C | -2.92910600 | 6.21359200  | 0.49994200  |
| H            | -8.04471100 | -1.23160400 | 1.36048000  | C | -2.53025800 | 7.03299400  | 1.53435500  |
| H            | -6.02585100 | 0.19900600  | 1.39561500  | H | 1.12135800  | 4.00134900  | 0.45635500  |
| C            | -3.45820900 | -0.67160200 | 1.43818400  | H | -0.93451100 | 7.55159100  | 2.90965100  |
| C            | -3.20089300 | -3.45594500 | 1.40751800  | H | 0.62974600  | 5.84360100  | 2.04010900  |
| H            | -5.58431600 | -4.76432300 | 1.36006200  | C | 0.12621400  | 4.09825100  | 0.02638100  |
| H            | -7.82246400 | -3.71188800 | 1.34079400  | C | -2.42468800 | 4.36077800  | -1.08885900 |
| C            | -2.08032700 | -2.66647400 | 1.43878200  | H | -3.92142600 | 6.31599000  | 0.06725100  |
| C            | -2.19232000 | -1.24220600 | 1.46054300  | H | -3.20862700 | 7.78707000  | 1.92372400  |
| H            | -3.10112600 | -4.53820900 | 1.38338300  | C | -1.55767900 | 3.41299600  | -1.57280500 |
| H            | -1.09965900 | -3.12761700 | 1.42486600  | C | -0.25069500 | 3.25959300  | -1.01328800 |
| C            | -1.03124800 | -0.35999800 | 1.56997700  | H | -3.41286600 | 4.47020300  | -1.52955700 |
| H            | -1.27033900 | 0.70244000  | 1.58522400  | H | -1.86303400 | 2.78075200  | -2.40107500 |
| C            | 0.27548800  | -0.71628500 | 1.75585300  | C | 0.70855400  | 2.26406800  | -1.50287600 |
| H            | 0.58117700  | -1.75074000 | 1.87710100  | H | 1.69657200  | 2.31500800  | -1.04871700 |
| H            | 0.98997400  | 0.04471900  | 2.05518800  | C | 0.50199600  | 1.31844100  | -2.44782300 |
| I            | 0.38086900  | -2.77309500 | -1.56855400 | H | -0.43297100 | 1.20767800  | -2.98814800 |
| C            | 3.14163100  | 6.06976800  | -0.44376300 | H | 1.32653400  | 0.70267200  | -2.79482500 |
| C            | 3.07403300  | 4.78329400  | -0.93257800 | C | -7.58262900 | -1.67344400 | 0.28620500  |
| C            | 3.09581400  | 3.66623200  | -0.04996100 | C | -6.51326900 | -0.83533400 | 0.06075400  |
| C            | 3.19609800  | 3.90710900  | 1.36107100  | C | -5.23440200 | -1.12803500 | 0.60728500  |
| C            | 3.26478400  | 5.23999700  | 1.83113300  | C | -5.07128600 | -2.31134700 | 1.39851700  |
| C            | 3.23714100  | 6.30277300  | 0.94948500  | C | -6.19161000 | -3.15347400 | 1.61228900  |
| H            | 2.98078700  | 2.16960100  | -1.59206100 | C | -7.42022200 | -2.84242900 | 1.06900200  |
| H            | 3.12344400  | 6.91275200  | -1.12910400 | H | -4.23917500 | 0.60609600  | -0.20960600 |
| H            | 3.00281700  | 4.60360800  | -2.00276500 | H | -8.55564800 | -1.44185200 | -0.13798300 |
| C            | 3.02632700  | 2.33423600  | -0.51793600 | H | -6.63238000 | 0.06156600  | -0.54230600 |
| C            | 3.23446600  | 2.77938400  | 2.23377800  | C | -4.11322900 | -0.28933700 | 0.39525400  |
| H            | 3.34148000  | 5.41557000  | 2.90170000  | C | -3.78519100 | -2.59673100 | 1.93998000  |
| H            | 3.29101300  | 7.32177000  | 1.32230900  | H | -6.06576900 | -4.05243900 | 2.21080800  |
| C            | 3.16354300  | 1.49830500  | 1.75437100  | H | -8.27086700 | -3.49681800 | 1.23855800  |
| C            | 3.04132700  | 1.22312700  | 0.34465400  | C | -2.71966100 | -1.76323800 | 1.72014600  |
| H            | 3.33271900  | 2.95343200  | 3.30305400  | C | -2.86801500 | -0.57904300 | 0.93526000  |
| H            | 3.21857300  | 0.66900900  | 2.45206200  | H | -3.65816600 | -3.49800400 | 2.53458500  |
| C            | 2.94543300  | -0.12039600 | -0.17452600 | H | -1.75050600 | -2.01244700 | 2.14011500  |
| H            | 3.03074700  | -0.19805700 | -1.25706400 | C | -1.77463600 | 0.36308200  | 0.70958400  |
| C            | 3.45242300  | -1.32492400 | 0.58307900  | H | -2.03404900 | 1.22874700  | 0.10118600  |
| H            | 3.10500900  | -1.31033500 | 1.62395400  | C | -0.50759200 | 0.31200500  | 1.22066500  |
| H            | 3.03292800  | -2.23061700 | 0.13114000  | H | -0.20850500 | -0.45345800 | 1.92892600  |
| C            | 7.53752800  | -2.97583900 | 0.14545000  | H | 0.14361700  | 1.17684400  | 1.14238500  |
| C            | 7.12194800  | -1.82094500 | -0.77717900 | I | -1.13641700 | -2.18683000 | -2.33391800 |
| C            | 5.59529300  | -1.64057400 | -0.80858200 | C | 6.13557700  | 3.14633000  | -1.15825900 |
| C            | 5.00346400  | -1.45037700 | 0.60075200  | C | 5.31391500  | 2.08943100  | -1.48237100 |
| C            | 5.43326600  | -2.61055300 | 1.51982800  | C | 4.49640200  | 1.46995000  | -0.49518500 |
| C            | 6.95955700  | -2.79082900 | 1.55614300  | C | 4.54933200  | 1.96821200  | 0.84897000  |
| H            | 5.33878500  | -0.78629100 | -1.44738700 | C | 5.40630400  | 3.05717500  | 1.15038300  |
| H            | 7.58905500  | -0.88971400 | -0.42289700 | C | 6.18359800  | 3.63710800  | 0.16999900  |
| H            | 7.49889600  | -1.99050100 | -1.79397900 | H | 3.62616900  | 0.00183800  | -1.81417600 |
| H            | 7.17071700  | -3.92422800 | -0.27429100 | H | 6.75355600  | 3.60827200  | -1.92358100 |
| H            | 8.63145700  | -3.05522900 | 0.18920100  | H | 5.27937800  | 1.71180000  | -2.50177300 |
| H            | 5.41526800  | -0.51780500 | 1.01876400  | C | 3.63986500  | 0.38126200  | -0.79343100 |
| H            | 5.04961600  | -2.44332900 | 2.53585300  | C | 3.73786400  | 1.33168700  | 1.82993500  |
| H            | 4.96617100  | -3.54000300 | 1.16003000  | H | 5.44307400  | 3.42715700  | 2.17277800  |
| H            | 7.41775100  | -1.90510700 | 2.02122400  | H | 6.83740700  | 4.47025500  | 0.41285400  |
| H            | 7.22087600  | -3.64667600 | 2.19196500  | C | 2.91720500  | 0.27925800  | 1.50647500  |
| H            | 5.13251300  | -2.52575600 | -1.27083100 | C | 2.83123600  | -0.22894300 | 0.16761500  |
|              |             |             |             | H | 3.78411300  | 1.68942200  | 2.85659000  |
|              |             |             |             | H | 2.32315900  | -0.18662500 | 2.28674400  |
|              |             |             |             | C | 1.91756300  | -1.32699500 | -0.19987600 |
|              |             |             |             | H | 2.16501000  | -1.71320900 | -1.19620100 |
|              |             |             |             | C | 1.70136400  | -2.47204700 | 0.78875500  |
|              |             |             |             | H | 1.30780800  | -2.09115900 | 1.74211600  |
|              |             |             |             | H | 0.92674000  | -3.13891600 | 0.38725300  |
|              |             |             |             | C | 4.41637500  | -5.92535200 | 1.34432000  |
| <b>CP8-t</b> |             |             |             |   |             |             |             |
| Ni           | 0.11301000  | -0.54680500 | -0.77229700 |   |             |             |             |
| C            | -1.23669100 | 6.89898100  | 2.09529700  |   |             |             |             |
| C            | -0.36450100 | 5.94832800  | 1.61258900  |   |             |             |             |
| C            | -0.74585300 | 5.08779300  | 0.54779300  |   |             |             |             |
| C            | -2.05475100 | 5.22444800  | -0.01866500 |   |             |             |             |

|   |            |             |             |
|---|------------|-------------|-------------|
| C | 4.72972100 | -4.93077400 | 0.21692400  |
| C | 3.51168200 | -4.05700500 | -0.12494400 |
| C | 2.95961500 | -3.31991000 | 1.11011100  |
| C | 2.65722100 | -4.32731500 | 2.23703700  |
| C | 3.87283200 | -5.20097000 | 2.58482000  |
| H | 3.78228400 | -3.33723600 | -0.90691200 |
| H | 5.56278200 | -4.28300900 | 0.52864200  |
| H | 5.07040800 | -5.46571600 | -0.67904700 |
| H | 3.66638200 | -6.64851100 | 0.99056600  |
| H | 5.31209900 | -6.50496600 | 1.60302500  |
| H | 3.74385000 | -2.63632700 | 1.47266900  |
| H | 2.31055000 | -3.79198400 | 3.13227700  |
| H | 1.82475700 | -4.97509800 | 1.92070200  |
| H | 4.66518400 | -4.56552600 | 3.00797500  |
| H | 3.60543100 | -5.92615900 | 3.36464600  |
| H | 2.71550700 | -4.69017400 | -0.54619800 |

### TS5

|    |             |             |             |
|----|-------------|-------------|-------------|
| Ni | -0.44063400 | -1.21621700 | -0.29953000 |
| C  | 6.90169500  | -0.41654000 | 1.52682900  |
| C  | 5.77573000  | -1.20459300 | 1.43374300  |
| C  | 4.81984100  | -0.98584900 | 0.40501600  |
| C  | 5.04647500  | 0.06891100  | -0.53757700 |
| C  | 6.21595500  | 0.86224000  | -0.41504800 |
| C  | 7.12431200  | 0.62624100  | 0.59457200  |
| H  | 3.48739400  | -2.58079800 | 0.99409300  |
| H  | 7.62510800  | -0.59279200 | 2.31808200  |
| H  | 5.60311000  | -2.00608000 | 2.14818800  |
| C  | 3.64753400  | -1.77479300 | 0.27987800  |
| C  | 4.08293800  | 0.27844000  | -1.56465800 |
| H  | 6.38476900  | 1.66198000  | -1.13220300 |
| H  | 8.01645200  | 1.24048200  | 0.67909200  |
| C  | 2.95897800  | -0.50378500 | -1.66094900 |
| C  | 2.71792800  | -1.55882400 | -0.72700600 |
| H  | 4.25212800  | 1.07605900  | -2.28419300 |
| H  | 2.24339800  | -0.31504900 | -2.45497700 |
| C  | 1.53414000  | -2.42789800 | -0.80539300 |
| H  | 1.49013600  | -3.20315100 | -0.04199700 |
| C  | 0.59292200  | -2.44824900 | -1.79948600 |
| H  | 0.64522400  | -1.79789600 | -2.66548500 |
| H  | -0.13136300 | -3.25312300 | -1.86324200 |
| C  | -0.90692600 | 6.39779200  | -0.27345600 |
| C  | -0.18471500 | 5.22629500  | -0.32971000 |
| C  | -0.63925100 | 4.05950100  | 0.34257500  |
| C  | -1.86473300 | 4.11914400  | 1.08190400  |
| C  | -2.58532800 | 5.33996900  | 1.12033900  |
| C  | -2.11814700 | 6.45540600  | 0.45828600  |
| H  | 1.01039500  | 2.79814500  | -0.25369600 |
| H  | -0.55032400 | 7.28317800  | -0.79269000 |
| H  | 0.74458400  | 5.17757000  | -0.89242300 |
| C  | 0.08080300  | 2.83981500  | 0.31040500  |
| C  | -2.31088100 | 2.94486400  | 1.75155600  |
| H  | -3.51664700 | 5.38183400  | 1.68023700  |
| H  | -2.68005500 | 7.38476800  | 0.49422500  |
| C  | -1.58996200 | 1.77966900  | 1.70188500  |
| C  | -0.36431600 | 1.70626800  | 0.97362500  |
| H  | -3.24429700 | 2.98437100  | 2.30785400  |
| H  | -1.96100700 | 0.90105700  | 2.22000300  |
| C  | 0.47206100  | 0.50113600  | 0.94110700  |
| H  | 1.41542000  | 0.62225200  | 0.41205000  |
| C  | 0.28558100  | -0.67029700 | 1.64405700  |
| H  | -0.54638700 | -0.78782800 | 2.33210700  |
| H  | 1.11607500  | -1.35644700 | 1.77455500  |

|   |             |             |             |
|---|-------------|-------------|-------------|
| I | -2.26183300 | -0.30128600 | -1.87305500 |
| C | -4.21054500 | -3.27871700 | 2.00270200  |
| C | -2.94864000 | -2.76270800 | 2.71041000  |
| C | -1.69339800 | -3.50548900 | 2.21766600  |
| C | -1.58529300 | -3.53994000 | 0.71832200  |
| C | -2.83181000 | -3.85429800 | -0.06157600 |
| C | -4.08435900 | -3.14023300 | 0.47875300  |
| H | -0.78451800 | -3.09305700 | 2.67189100  |
| H | -2.83922500 | -1.68812000 | 2.50581400  |
| H | -3.04078700 | -2.87270500 | 3.79820400  |
| H | -4.36804500 | -4.33505900 | 2.26987600  |
| H | -5.09235100 | -2.73162900 | 2.35908400  |
| H | -0.64884600 | -3.92601200 | 0.31590900  |
| H | -2.69811200 | -3.62744600 | -1.12522300 |
| H | -2.99581400 | -4.94931300 | 0.00073400  |
| H | -4.02466700 | -2.07896200 | 0.20973900  |
| H | -4.97566700 | -3.54298000 | -0.01755700 |
| H | -1.75269800 | -4.55185500 | 2.57809500  |

### TS6-t

|    |             |             |             |
|----|-------------|-------------|-------------|
| Ni | -0.46499800 | -1.14090300 | -0.32729200 |
| C  | 6.95854600  | -0.41951200 | 1.53581500  |
| C  | 5.83319800  | -1.20464000 | 1.41444000  |
| C  | 4.87785000  | -0.95045100 | 0.39360600  |
| C  | 5.10355500  | 0.13731400  | -0.51085000 |
| C  | 6.27203300  | 0.92711500  | -0.35959000 |
| C  | 7.18032800  | 0.65586700  | 0.64127900  |
| H  | 3.54734100  | -2.56739400 | 0.92455300  |
| H  | 7.68207400  | -0.62316400 | 2.32029700  |
| H  | 5.66111100  | -2.03110100 | 2.09990800  |
| C  | 3.70717100  | -1.73672200 | 0.23925100  |
| C  | 4.14029000  | 0.38225600  | -1.53055600 |
| H  | 6.44047600  | 1.75185100  | -1.04791300 |
| H  | 8.07200700  | 1.26738400  | 0.74756300  |
| C  | 3.01880400  | -0.39895600 | -1.65672300 |
| C  | 2.78008500  | -1.48823400 | -0.76221500 |
| H  | 4.30818600  | 1.20610300  | -2.22018300 |
| H  | 2.30264200  | -0.18398000 | -2.44357500 |
| C  | 1.60255800  | -2.35969500 | -0.87745900 |
| H  | 1.54580900  | -3.14948900 | -0.12974000 |
| C  | 0.66468600  | -2.34766500 | -1.86773000 |
| H  | 0.71215600  | -1.67020700 | -2.71309600 |
| H  | -0.07186100 | -3.14069900 | -1.94430100 |
| C  | -0.99748700 | 6.36308900  | -0.19878300 |
| C  | -0.25580100 | 5.20431700  | -0.26294700 |
| C  | -0.69741600 | 4.02198400  | 0.39051900  |
| C  | -1.92986700 | 4.05285500  | 1.12006900  |
| C  | -2.67033600 | 5.26153100  | 1.16755800  |
| C  | -2.21576200 | 6.39220700  | 0.52304800  |
| H  | 0.97504700  | 2.79460700  | -0.21120700 |
| H  | -0.65105600 | 7.26039700  | -0.70422000 |
| H  | 0.67872200  | 5.17757100  | -0.81840200 |
| C  | 0.04062300  | 2.81342400  | 0.34605300  |
| C  | -2.36275200 | 2.86351000  | 1.77115400  |
| H  | -3.60681000 | 5.28128700  | 1.71993700  |
| H  | -2.79299000 | 7.31184700  | 0.56513200  |
| C  | -1.62452400 | 1.70949200  | 1.71005700  |
| C  | -0.39393100 | 1.66408900  | 0.98818900  |
| H  | -3.30019200 | 2.88152600  | 2.32170600  |
| H  | -1.98617000 | 0.81843500  | 2.21353900  |
| C  | 0.45396600  | 0.46489900  | 0.93459100  |
| H  | 1.40001200  | 0.60583700  | 0.41488800  |
| C  | 0.27847700  | -0.71547200 | 1.62826800  |

|   |             |             |             |
|---|-------------|-------------|-------------|
| H | -0.54936000 | -0.85017100 | 2.31766300  |
| H | 1.11047400  | -1.40265700 | 1.74005100  |
| I | -2.27879600 | -0.33871100 | -1.96292900 |
| C | -4.16362200 | -3.30648700 | 2.12284600  |
| C | -2.86934200 | -2.85081700 | 2.81327100  |
| C | -1.64247500 | -3.58250900 | 2.23714400  |
| C | -1.59194100 | -3.53653600 | 0.73574600  |
| C | -2.86720900 | -3.80472900 | -0.01259000 |
| C | -4.08579200 | -3.09352100 | 0.60387200  |
| H | -0.71354000 | -3.20046400 | 2.67830000  |
| H | -2.74934600 | -1.76814100 | 2.66378200  |
| H | -2.92708800 | -3.01797400 | 3.89622400  |
| H | -4.33286300 | -4.37233700 | 2.34039100  |
| H | -5.02242900 | -2.76341300 | 2.53728800  |
| H | -0.66708700 | -3.87998200 | 0.27196500  |
| H | -2.76608300 | -3.53107400 | -1.06844300 |
| H | -3.05092200 | -4.89834600 | 0.00838500  |
| H | -4.01191200 | -2.02119100 | 0.38456200  |
| H | -5.00246300 | -3.45202200 | 0.11993500  |
| H | -1.70125100 | -4.64409100 | 2.55044100  |

### CP9-t

|    |             |             |             |
|----|-------------|-------------|-------------|
| Ni | 1.89425600  | -0.85057400 | -0.20199400 |
| C  | -5.92316000 | -2.90992900 | -1.13942100 |
| C  | -4.61574500 | -3.26383400 | -1.38980700 |
| C  | -3.58511300 | -2.93427900 | -0.46800900 |
| C  | -3.92670000 | -2.22746800 | 0.73108300  |
| C  | -5.28269600 | -1.87692200 | 0.95905700  |
| C  | -6.25977500 | -2.20999900 | 0.04515700  |
| H  | -1.97395900 | -3.81960000 | -1.60374000 |
| H  | -6.70274000 | -3.16733800 | -1.85100800 |
| H  | -4.35451900 | -3.80172600 | -2.29811900 |
| C  | -2.22762300 | -3.27830800 | -0.69383900 |
| C  | -2.88680100 | -1.90008100 | 1.64726200  |
| H  | -5.53946700 | -1.34265000 | 1.87067300  |
| H  | -7.29490200 | -1.93745000 | 0.23152800  |
| C  | -1.58283100 | -2.24973900 | 1.40342900  |
| C  | -1.22673000 | -2.95720600 | 0.21367500  |
| H  | -3.14040100 | -1.35481500 | 2.55293000  |
| H  | -0.81191100 | -1.96444100 | 2.11133300  |
| C  | 0.15364500  | -3.35121700 | -0.08384900 |
| H  | 0.29463100  | -3.82066900 | -1.05784100 |
| C  | 1.24009400  | -3.20824800 | 0.70795000  |
| H  | 1.18477700  | -2.80863200 | 1.71587900  |
| H  | 2.19949100  | -3.60986500 | 0.39871900  |
| C  | -2.05589000 | 6.05238100  | -0.11196300 |
| C  | -1.08048600 | 5.22549600  | -0.62338600 |
| C  | -1.30470000 | 3.82718100  | -0.74288500 |
| C  | -2.56271100 | 3.28594900  | -0.32149300 |
| C  | -3.54670100 | 4.16416400  | 0.19917400  |
| C  | -3.29990300 | 5.51680900  | 0.30213300  |
| H  | 0.63120200  | 3.36210200  | -1.57953700 |
| H  | -1.87381600 | 7.11966000  | -0.02235700 |
| H  | -0.12261600 | 5.63126200  | -0.93956100 |
| C  | -0.32483200 | 2.94838200  | -1.26584500 |
| C  | -2.77610700 | 1.88311800  | -0.44355400 |
| H  | -4.50095000 | 3.75246600  | 0.51895500  |
| H  | -4.06140500 | 6.17915600  | 0.70475700  |
| C  | -1.80792900 | 1.05737900  | -0.95312300 |
| C  | -0.54951900 | 1.58352900  | -1.37780300 |
| H  | -3.72888700 | 1.46813500  | -0.12408800 |
| H  | -2.00381200 | -0.00650800 | -1.03348500 |
| C  | 0.49916800  | 0.74845800  | -1.95826200 |

|   |             |             |             |
|---|-------------|-------------|-------------|
| H | 1.37580000  | 1.29417200  | -2.30696100 |
| C | 0.48914700  | -0.60073400 | -2.13304900 |
| H | -0.37428800 | -1.20347800 | -1.86887300 |
| H | 1.25692800  | -1.08034600 | -2.73034900 |
| I | 1.68572600  | 0.62136200  | 1.91319700  |
| C | 5.90761200  | 0.25420100  | -0.65999600 |
| C | 4.76587700  | 0.72901800  | -1.57174500 |
| C | 4.05020900  | -0.46604800 | -2.22466600 |
| C | 3.52350100  | -1.47269200 | -1.19340000 |
| C | 4.64978200  | -1.91733800 | -0.24586600 |
| C | 5.40210700  | -0.73909500 | 0.39731900  |
| H | 3.24850600  | -0.10943700 | -2.88681600 |
| H | 4.04632500  | 1.30811800  | -0.97519700 |
| H | 5.15389500  | 1.40319400  | -2.34713700 |
| H | 6.68007100  | -0.22995300 | -1.27736700 |
| H | 6.38821800  | 1.11277200  | -0.17363200 |
| H | 3.11180700  | -2.35479800 | -1.71356800 |
| H | 4.26950800  | -2.58380700 | 0.54097600  |
| H | 5.37787800  | -2.51932300 | -0.82081600 |
| H | 4.73343000  | -0.21702000 | 1.09314400  |
| H | 6.24389600  | -1.11894600 | 0.99129400  |
| H | 4.77351700  | -0.97392300 | -2.88901600 |

### CP10

|    |             |             |             |
|----|-------------|-------------|-------------|
| Ni | 1.42943600  | -0.50270700 | 0.14151900  |
| I  | 1.81257200  | 1.53620800  | 1.75527300  |
| C  | 5.74161100  | -1.40561900 | -1.91647400 |
| C  | 5.39755700  | 0.01984600  | -1.46703900 |
| C  | 3.86839900  | 0.20736100  | -1.30063700 |
| C  | 3.32003700  | -0.83058800 | -0.32969000 |
| C  | 3.61851000  | -2.25613100 | -0.78451300 |
| C  | 5.14809900  | -2.44510400 | -0.95744200 |
| H  | 3.65763300  | 1.21784700  | -0.93946500 |
| H  | 5.89138200  | 0.23424200  | -0.50922700 |
| H  | 5.77504400  | 0.75626300  | -2.18805000 |
| H  | 5.34360500  | -1.57508500 | -2.92819900 |
| H  | 6.82981800  | -1.53221800 | -1.98371300 |
| H  | 3.73415000  | -0.65375100 | 0.66763900  |
| H  | 3.25437200  | -2.99854700 | -0.06682500 |
| H  | 3.13132700  | -2.47291700 | -1.74450100 |
| H  | 5.63289400  | -2.35436600 | 0.02479900  |
| H  | 5.34755000  | -3.46376600 | -1.31492000 |
| H  | 3.40348900  | 0.09859900  | -2.29066100 |
| C  | -5.03311400 | -4.15533400 | -1.07075400 |
| C  | -3.65643500 | -4.16141100 | -1.04136200 |
| C  | -2.94518700 | -3.33295600 | -0.13013200 |
| C  | -3.68625000 | -2.49012700 | 0.76217500  |
| C  | -5.10432600 | -2.50760100 | 0.70641600  |
| C  | -5.76437700 | -3.32083600 | -0.18937900 |
| H  | -0.97244700 | -3.96185200 | -0.74553600 |
| H  | -5.56524600 | -4.79264000 | -1.77159200 |
| H  | -3.09348900 | -4.80186800 | -1.71633200 |
| C  | -1.52890500 | -3.31133800 | -0.07285400 |
| C  | -2.96563100 | -1.66615400 | 1.67109400  |
| H  | -5.66294000 | -1.86833000 | 1.38596700  |
| H  | -6.85034000 | -3.32620000 | -0.22243400 |
| C  | -1.59340200 | -1.66893700 | 1.70574600  |
| C  | -0.83955400 | -2.50511500 | 0.82470800  |
| H  | -3.52230900 | -1.02107700 | 2.34635000  |
| H  | -1.07736000 | -1.01762000 | 2.40352200  |
| C  | 0.62954600  | -2.55297400 | 0.85342100  |
| H  | 1.08143900  | -3.24222400 | 0.14489600  |
| C  | 1.43007100  | -1.94137000 | 1.78957600  |



|   |             |             |             |
|---|-------------|-------------|-------------|
| H | 1.02099600  | -1.39333100 | 2.62974600  |
| H | 2.47949500  | -2.19897200 | 1.87211100  |
| C | -2.61611600 | 5.71416200  | -0.61612500 |
| C | -1.50465300 | 4.94431000  | -0.87593900 |
| C | -1.60529800 | 3.52842200  | -0.96165800 |
| C | -2.88462700 | 2.91144500  | -0.76933100 |
| C | -4.01081100 | 3.73298600  | -0.50529900 |
| C | -3.88109100 | 5.10308600  | -0.43049700 |
| H | 0.48673600  | 3.18230900  | -1.36330900 |
| H | -2.52705100 | 6.79501500  | -0.55006300 |
| H | -0.53115400 | 5.40820600  | -1.01401400 |
| C | -0.48287600 | 2.70915500  | -1.23062600 |
| C | -2.97216300 | 1.49435500  | -0.85458400 |
| H | -4.98076500 | 3.26263600  | -0.36112200 |
| H | -4.75088800 | 5.72169200  | -0.22629800 |
| C | -1.86497800 | 0.72651400  | -1.11634200 |
| C | -0.58463400 | 1.32722700  | -1.31165400 |
| H | -3.93964600 | 1.01876900  | -0.71236300 |
| H | -1.97235000 | -0.35094800 | -1.18011800 |
| C | 0.61616600  | 0.54694400  | -1.64843000 |
| H | 1.47152900  | 1.14458700  | -1.94659200 |
| C | 0.67404000  | -0.82293000 | -1.82931600 |
| H | -0.21288500 | -1.44358400 | -1.74850200 |
| H | 1.50923400  | -1.26181800 | -2.36153100 |

### TS7

|    |             |             |             |
|----|-------------|-------------|-------------|
| Ni | -0.39794700 | -1.58764000 | 0.81065900  |
| C  | -4.39190400 | -3.01905600 | -1.10358800 |
| C  | -3.93875500 | -1.85267300 | -0.21453800 |
| C  | -2.56677600 | -2.18341600 | 0.43367100  |
| C  | -1.53251600 | -2.43923500 | -0.66975200 |
| C  | -1.94507800 | -3.65213200 | -1.49960700 |
| C  | -3.32584700 | -3.38248800 | -2.14432700 |
| H  | -2.32798900 | -1.31614100 | 1.09435300  |
| H  | -3.84687800 | -0.93213500 | -0.80476200 |
| H  | -4.66837500 | -1.65570900 | 0.57851400  |
| H  | -4.60515300 | -3.89311500 | -0.47287500 |
| H  | -5.33192400 | -2.75738800 | -1.60260000 |
| H  | -1.41669300 | -1.56143000 | -1.32046500 |
| H  | -1.21599200 | -3.86978900 | -2.28630100 |
| H  | -2.00801300 | -4.54003900 | -0.85650900 |
| H  | -3.22661200 | -2.56684600 | -2.87365500 |
| H  | -3.62814600 | -4.27163000 | -2.70888600 |
| H  | -2.66694600 | -3.06929700 | 1.07187300  |
| C  | 6.52224200  | 1.09338000  | 0.51059600  |
| C  | 5.59640700  | 0.18499200  | 0.97339100  |
| C  | 4.43753200  | -0.11784400 | 0.20800000  |
| C  | 4.24678900  | 0.53523000  | -1.05455200 |
| C  | 5.21873600  | 1.46490300  | -1.50254300 |
| C  | 6.33223300  | 1.73798900  | -0.73650800 |
| H  | 3.62227400  | -1.54855300 | 1.60382100  |
| H  | 7.40578100  | 1.31801300  | 1.10056600  |
| H  | 5.74249800  | -0.31350600 | 1.92826600  |
| C  | 3.46406800  | -1.04774800 | 0.65042500  |
| C  | 3.08467100  | 0.21967400  | -1.81424600 |
| H  | 5.07546700  | 1.95701400  | -2.46102100 |
| H  | 7.07262800  | 2.44988400  | -1.08912900 |
| C  | 2.16019100  | -0.68897300 | -1.36104200 |
| C  | 2.33802600  | -1.34975100 | -0.10597400 |
| H  | 2.94070400  | 0.70857800  | -2.77451400 |
| H  | 1.28714300  | -0.90751500 | -1.96978000 |
| C  | 1.37250000  | -2.33220700 | 0.41222800  |
| H  | 1.67243900  | -2.81300800 | 1.34381900  |

|   |             |             |             |
|---|-------------|-------------|-------------|
| C | 0.45585600  | -3.07319800 | -0.41228400 |
| H | 0.57477700  | -2.98056500 | -1.48680500 |
| H | 0.20421900  | -4.07670300 | -0.08100300 |
| C | -2.35581400 | 4.79184800  | -1.60306600 |
| C | -1.39869500 | 3.89202600  | -1.18995300 |
| C | -1.66252400 | 3.00127300  | -0.11375200 |
| C | -2.93984700 | 3.05280300  | 0.53784600  |
| C | -3.90218300 | 3.99132300  | 0.08929300  |
| C | -3.61632600 | 4.84142900  | -0.95867500 |
| H | 0.26923100  | 2.03228400  | -0.14822400 |
| H | -2.14664300 | 5.47135800  | -2.42380400 |
| H | -0.42822000 | 3.85500000  | -1.67821600 |
| C | -0.70191200 | 2.06671700  | 0.34174000  |
| C | -3.18869300 | 2.16618000  | 1.62523800  |
| H | -4.86798200 | 4.03496200  | 0.58567800  |
| H | -4.36001700 | 5.55854300  | -1.29336800 |
| C | -2.23992600 | 1.26825900  | 2.04537800  |
| C | -0.96686900 | 1.19810400  | 1.39677900  |
| H | -4.14572700 | 2.22530600  | 2.13713200  |
| H | -2.44587500 | 0.63432600  | 2.90296400  |
| C | 0.08154700  | 0.25871000  | 1.80653800  |
| H | 1.07426100  | 0.48142200  | 1.42132300  |
| C | -0.03341000 | -0.78741100 | 2.70383500  |
| H | -0.94404500 | -0.96291900 | 3.27264400  |
| H | 0.85998200  | -1.26873100 | 3.08919200  |

### I-

|   |            |            |            |
|---|------------|------------|------------|
| I | 0.00000000 | 0.00000000 | 0.00000000 |
|---|------------|------------|------------|

### PhZnI

|    |             |             |             |
|----|-------------|-------------|-------------|
| Zn | -0.05341300 | -0.00008600 | -0.00000600 |
| C  | 1.94667900  | -0.00007800 | 0.00016300  |
| C  | 2.66933200  | 1.20648000  | 0.00023500  |
| C  | 2.66950000  | -1.20653000 | 0.00023500  |
| C  | 4.06684200  | 1.20779100  | 0.00037300  |
| H  | 2.15004700  | 2.16305400  | 0.00018100  |
| C  | 4.06701000  | -1.20764300 | 0.00037400  |
| H  | 2.15034600  | -2.16317500 | 0.00018100  |
| C  | 4.76714300  | 0.00012300  | 0.00044400  |
| H  | 4.60708200  | 2.15132200  | 0.00042700  |
| H  | 4.60738100  | -2.15109900 | 0.00042700  |
| H  | 5.85404000  | 0.00019800  | 0.00055300  |
| I  | -2.62048200 | 0.00002700  | -0.00023700 |

### TS8

|    |             |             |             |
|----|-------------|-------------|-------------|
| Ni | -0.13722700 | 0.15052900  | -0.84924400 |
| I  | -0.35377500 | -2.04597400 | 0.99831100  |
| C  | -2.55335100 | 4.38237800  | -3.61014200 |
| C  | -1.47906500 | 3.60021700  | -3.23225200 |
| C  | -1.29267900 | 3.23579400  | -1.87596600 |
| C  | -2.22888300 | 3.69348100  | -0.89596100 |
| C  | -3.31770800 | 4.49471200  | -1.31175400 |
| C  | -3.47825000 | 4.83211700  | -2.64292800 |
| H  | 0.62157300  | 2.27099000  | -2.16709800 |
| H  | -2.68702500 | 4.65622700  | -4.65264100 |
| H  | -0.76009500 | 3.25710000  | -3.97236500 |
| C  | -0.17218500 | 2.45632100  | -1.45033900 |
| C  | -2.02854700 | 3.32240500  | 0.47496200  |
| H  | -4.02922000 | 4.84366700  | -0.56737600 |
| H  | -4.31921300 | 5.44818400  | -2.94844100 |
| C  | -0.96883000 | 2.55241400  | 0.86347200  |
| C  | 0.02790700  | 2.12887400  | -0.09067300 |
| H  | -2.74820600 | 3.66770100  | 1.21353200  |

|             |             |             |             |   |             |             |             |
|-------------|-------------|-------------|-------------|---|-------------|-------------|-------------|
| H           | -0.84875100 | 2.27690500  | 1.90504700  | C | 0.11659300  | -3.20760900 | -0.96652200 |
| C           | 1.16620100  | 1.28747100  | 0.22412600  | C | 0.54149000  | -3.49113400 | 0.36745000  |
| H           | 2.00774900  | 1.44032900  | -0.45461800 | C | 1.43815500  | -4.56025000 | 0.59475900  |
| C           | 1.58649000  | 1.05419100  | 1.66359400  | C | 1.90315100  | -5.33104100 | -0.45574500 |
| H           | 0.72473700  | 0.74553900  | 2.26449500  | H | -1.22394700 | -2.01697500 | -2.18485000 |
| H           | 2.29434000  | 0.21736300  | 1.71599600  | H | 1.84423600  | -5.66652700 | -2.59468400 |
| C           | 4.49740600  | 3.56305600  | 3.85675900  | H | 0.27310500  | -3.80945200 | -3.03803300 |
| C           | 4.27584200  | 3.85590400  | 2.36582200  | C | -0.79024100 | -2.12053300 | -1.19076500 |
| C           | 3.59092800  | 2.67927600  | 1.65084900  | C | 0.02503100  | -2.68314000 | 1.43379600  |
| C           | 2.26561200  | 2.28097800  | 2.33013000  | H | 1.75492600  | -4.77203000 | 1.61354900  |
| C           | 2.49932200  | 1.99756900  | 3.82773500  | H | 2.59104300  | -6.15073700 | -0.26837800 |
| C           | 3.18054400  | 3.17380000  | 4.54434700  | C | -0.84899300 | -1.66051200 | 1.20679600  |
| H           | 3.41943700  | 2.94230800  | 0.59902400  | C | -1.31810800 | -1.35537000 | -0.12723500 |
| H           | 3.64987900  | 4.75533600  | 2.26346700  | H | 0.34445900  | -2.90695300 | 2.44942500  |
| H           | 5.23086100  | 4.08415800  | 1.87570500  | H | -1.22100300 | -1.07249000 | 2.03902800  |
| H           | 5.21703000  | 2.73780000  | 3.96012400  | C | -2.09430500 | -0.17779100 | -0.46197400 |
| H           | 4.94483600  | 4.43343700  | 4.35377300  | H | -2.66729000 | -0.27985500 | -1.38830000 |
| H           | 1.57707900  | 3.13831100  | 2.25286800  | C | -2.79251000 | 0.65825600  | 0.59076200  |
| H           | 1.54406300  | 1.75973300  | 4.31526100  | H | -2.10376700 | 0.88343300  | 1.41536700  |
| H           | 3.12816800  | 1.09995500  | 3.92414600  | H | -3.04562400 | 1.62991700  | 0.15070100  |
| H           | 2.50245400  | 4.04060600  | 4.54520600  | C | -6.98280000 | 0.08337700  | 1.90138900  |
| H           | 3.35935400  | 2.91748700  | 5.59642900  | C | -6.47761700 | -0.73114800 | 0.70098000  |
| H           | 4.26485100  | 1.80960300  | 1.64923300  | C | -5.19016400 | -0.13245800 | 0.11270700  |
| Zn          | 1.92064900  | -1.44023500 | -0.43294600 | C | -4.07915600 | 0.02024700  | 1.17005200  |
| C           | 1.29031200  | -0.80602100 | -2.35734700 | C | -4.60266100 | 0.83390700  | 2.37055600  |
| C           | 2.05734400  | 0.12725700  | -3.08869400 | C | -5.88694700 | 0.23667900  | 2.96648900  |
| C           | 0.83327500  | -1.93576700 | -3.07618300 | H | -4.84038400 | -0.75590500 | -0.71967500 |
| C           | 2.30272400  | -0.01801100 | -4.45603500 | H | -6.28059900 | -1.76465300 | 1.02327800  |
| H           | 2.49153800  | 0.98927700  | -2.58301300 | H | -7.25340600 | -0.78982100 | -0.07358000 |
| C           | 1.08333700  | -2.10266600 | -4.44091000 | H | -7.29243400 | 1.08115200  | 1.55609000  |
| H           | 0.26198500  | -2.70532200 | -2.55755100 | H | -7.87419200 | -0.38789000 | 2.33559200  |
| C           | 1.80965200  | -1.13435500 | -5.13736600 | H | -3.82753200 | -0.98885300 | 1.53617700  |
| H           | 2.89031700  | 0.72758400  | -4.98682300 | H | -3.82406700 | 0.90128100  | 3.14294900  |
| H           | 0.71698200  | -2.98629500 | -4.95823500 | H | -4.80077700 | 1.86563800  | 2.04115100  |
| H           | 2.00521000  | -1.25618200 | -6.19965100 | H | -5.66123600 | -0.75050200 | 3.39713200  |
| I           | 4.36025600  | -1.99826500 | 0.31680700  | H | -6.24490100 | 0.86235500  | 3.79454600  |
| C           | -6.98762500 | -0.67878200 | 3.01755900  | H | -5.41182100 | 0.85929700  | -0.31186000 |
| C           | -6.07235100 | 0.00137800  | 2.24560900  | C | -0.64529800 | 2.03176300  | -1.24338200 |
| C           | -5.27026900 | -0.68669500 | 1.29479500  | C | -1.34296600 | 2.67046800  | -2.28502900 |
| C           | -5.42869800 | -2.10322000 | 1.14784100  | C | -0.17762900 | 2.83945600  | -0.19196700 |
| C           | -6.38054500 | -2.77442300 | 1.95725100  | C | -1.55163300 | 4.05363700  | -2.28632000 |
| C           | -7.14252100 | -2.07933700 | 2.87199900  | H | -1.73534900 | 2.08506100  | -3.11580100 |
| H           | -4.20720300 | 1.05701400  | 0.59207300  | C | -0.38115800 | 4.22468700  | -0.18872300 |
| H           | -7.59446400 | -0.14371800 | 3.74271200  | H | 0.35656300  | 2.39165100  | 0.64376700  |
| H           | -5.94948500 | 1.07645200  | 2.35461900  | C | -1.06905900 | 4.83893200  | -1.23654800 |
| C           | -4.32139000 | -0.01917300 | 0.48254900  | H | -2.09504300 | 4.51699900  | -3.10781300 |
| C           | -4.62385400 | -2.78221300 | 0.19000800  | H | -0.00256600 | 4.82252200  | 0.63835700  |
| H           | -6.49811400 | -3.84958500 | 1.84628700  | H | -1.23087100 | 5.91413100  | -1.23400800 |
| H           | -7.86677400 | -2.60551600 | 3.48774300  | C | 5.89002000  | 0.22421400  | 2.87280600  |
| C           | -3.70961500 | -2.10820400 | -0.57808800 | C | 4.99396400  | -0.38963100 | 2.02612900  |
| C           | -3.53956700 | -0.69660400 | -0.44326200 | C | 4.30935500  | 0.35523400  | 1.02689500  |
| H           | -4.74187900 | -3.85697900 | 0.07734100  | C | 4.56786400  | 1.76020000  | 0.91248700  |
| H           | -3.10814900 | -2.65399200 | -1.29644700 | C | 5.49696000  | 2.36256500  | 1.79987600  |
| C           | -2.63634900 | 0.08044200  | -1.29298600 | C | 6.14397000  | 1.61345800  | 2.75899800  |
| H           | -2.73882800 | 1.15597600  | -1.18268800 | H | 3.19507100  | -1.31300900 | 0.22416000  |
| C           | -1.79536500 | -0.37936200 | -2.26748500 | H | 6.40703200  | -0.35573400 | 3.63252900  |
| H           | -1.72078300 | -1.43336300 | -2.50511900 | H | 4.79731700  | -1.45600300 | 2.10989800  |
| H           | -1.39030700 | 0.30759000  | -3.00331000 | C | 3.38441000  | -0.24491100 | 0.13676700  |
|             |             |             |             | C | 3.88079100  | 2.49572600  | -0.09318800 |
|             |             |             |             | H | 5.69081200  | 3.42892300  | 1.71031300  |
|             |             |             |             | H | 6.85335900  | 2.08663400  | 3.43254500  |
|             |             |             |             | C | 2.98822800  | 1.88663700  | -0.93946200 |
|             |             |             |             | C | 2.72092600  | 0.48747500  | -0.83856900 |
|             |             |             |             | H | 4.07365700  | 3.56203000  | -0.18433700 |
| <b>CP11</b> |             |             |             |   |             |             |             |
| Ni          | -0.30845000 | 0.15879600  | -1.25904700 |   |             |             |             |
| C           | 1.48090400  | -5.05559200 | -1.77283100 |   |             |             |             |
| C           | 0.60360500  | -4.01529500 | -2.02230100 |   |             |             |             |

|   |            |             |             |
|---|------------|-------------|-------------|
| H | 2.47507200 | 2.47653300  | -1.69030700 |
| C | 1.80872800 | -0.21831900 | -1.75028200 |
| H | 1.83853500 | -1.30105600 | -1.65890000 |
| C | 1.09519200 | 0.31681000  | -2.80322500 |
| H | 1.17573100 | 1.35802100  | -3.09260200 |
| H | 0.65396600 | -0.34738800 | -3.54386600 |

### ZnI<sub>2</sub>

|    |            |            |             |
|----|------------|------------|-------------|
| I  | 0.00000000 | 0.00000000 | -2.52895000 |
| Zn | 0.00000000 | 0.00000000 | -0.00000800 |
| I  | 0.00000000 | 0.00000000 | 2.52895400  |

### TS9

|    |             |             |             |
|----|-------------|-------------|-------------|
| Ni | -0.24177900 | 0.84283200  | -1.16622600 |
| C  | 2.32823200  | -3.76923400 | -2.13398200 |
| C  | 1.27314000  | -2.89060800 | -2.30210400 |
| C  | 0.66829500  | -2.26117800 | -1.18812600 |
| C  | 1.15745100  | -2.55728200 | 0.11966400  |
| C  | 2.23786600  | -3.45878400 | 0.26412200  |
| C  | 2.81659300  | -4.05522600 | -0.84107400 |
| H  | -0.89958800 | -1.28138800 | -2.31423500 |
| H  | 2.78020100  | -4.24606400 | -2.99965800 |
| H  | 0.89324200  | -2.67473700 | -3.29842600 |
| C  | -0.42376900 | -1.34087200 | -1.33621800 |
| C  | 0.52151800  | -1.93956900 | 1.24453900  |
| H  | 2.60965900  | -3.67537600 | 1.26273800  |
| H  | 3.64378500  | -4.74864600 | -0.71626400 |
| C  | -0.53310800 | -1.08422300 | 1.09446600  |
| C  | -1.07029700 | -0.77472700 | -0.20920300 |
| H  | 0.89808800  | -2.16683400 | 2.23912000  |
| H  | -0.98821100 | -0.63581700 | 1.97190800  |
| C  | -2.12910500 | 0.23457800  | -0.42041900 |
| H  | -2.59228300 | 0.13197300  | -1.40411200 |
| C  | -3.19671800 | 0.38593400  | 0.66763200  |
| H  | -2.72890000 | 0.66953100  | 1.61736700  |
| H  | -3.85595200 | 1.21960100  | 0.39997800  |
| C  | -6.67945500 | -2.30024100 | 1.11806900  |
| C  | -5.76087200 | -2.50906300 | -0.09456300 |
| C  | -4.87267100 | -1.28101400 | -0.35365200 |
| C  | -4.05047300 | -0.88390600 | 0.88866200  |
| C  | -4.98424900 | -0.68561500 | 2.10020700  |
| C  | -5.86951900 | -1.91341200 | 2.36422800  |
| H  | -4.20849800 | -1.48397200 | -1.20315500 |
| H  | -5.11985500 | -3.38501700 | 0.08454000  |
| H  | -6.35517400 | -2.73666200 | -0.98891700 |
| H  | -7.40075400 | -1.50047300 | 0.89266400  |
| H  | -7.26785800 | -3.20645300 | 1.31122900  |
| H  | -3.37341900 | -1.71986600 | 1.12300000  |
| H  | -4.38912900 | -0.45088400 | 2.99326300  |
| H  | -5.62533800 | 0.19044400  | 1.91638100  |
| H  | -5.23358300 | -2.76122700 | 2.65944500  |
| H  | -6.54043500 | -1.71782500 | 3.21069900  |
| H  | -5.50637700 | -0.42924300 | -0.64731000 |
| C  | -1.55433200 | 2.14850900  | -0.47881100 |
| C  | -2.37116300 | 2.90664600  | -1.34015400 |
| C  | -1.17125500 | 2.73261800  | 0.74587700  |
| C  | -2.74932700 | 4.20966500  | -1.01413500 |
| H  | -2.70512900 | 2.47681700  | -2.28258600 |
| C  | -1.54005700 | 4.04091600  | 1.06605000  |
| H  | -0.56729300 | 2.16460200  | 1.45052000  |
| C  | -2.33123400 | 4.78732700  | 0.18850000  |
| H  | -3.37171500 | 4.77730900  | -1.70249700 |
| H  | -1.21341200 | 4.47627400  | 2.00800200  |

|   |             |             |             |
|---|-------------|-------------|-------------|
| H | -2.62701100 | 5.80153500  | 0.44282700  |
| C | 6.33235300  | -0.96540200 | 1.50574200  |
| C | 5.40690800  | -0.97108600 | 0.48523300  |
| C | 4.47033700  | 0.08980300  | 0.34466500  |
| C | 4.50392200  | 1.16749100  | 1.28825000  |
| C | 5.47008600  | 1.14467600  | 2.32727700  |
| C | 6.36616300  | 0.10282700  | 2.43576200  |
| H | 3.49185300  | -0.70814700 | -1.40724700 |
| H | 7.04279100  | -1.78250800 | 1.60101900  |
| H | 5.37468200  | -1.79162800 | -0.22739600 |
| C | 3.50794400  | 0.11493300  | -0.69655400 |
| C | 3.55995100  | 2.22156200  | 1.13990500  |
| H | 5.49223700  | 1.96648600  | 3.03971200  |
| H | 7.10223500  | 0.09723600  | 3.23528900  |
| C | 2.63793700  | 2.21598200  | 0.12258700  |
| C | 2.59324600  | 1.15030800  | -0.83006100 |
| H | 3.58025600  | 3.04468000  | 1.85101700  |
| H | 1.92813500  | 3.03301600  | 0.04173300  |
| C | 1.61877200  | 1.12485600  | -1.93816000 |
| H | 1.77573100  | 0.31959600  | -2.65423600 |
| C | 0.75618800  | 2.16762800  | -2.29465500 |
| H | 0.78958600  | 3.13629900  | -1.80585300 |
| H | 0.30145400  | 2.16917800  | -3.28363200 |

### 3

|   |             |             |             |
|---|-------------|-------------|-------------|
| C | 4.78758300  | -1.69478200 | -1.00989900 |
| C | 3.50653800  | -1.34342000 | -1.37526800 |
| C | 2.66747800  | -0.62082200 | -0.48496100 |
| C | 3.17681000  | -0.26120300 | 0.80407400  |
| C | 4.50161900  | -0.63730700 | 1.15087900  |
| C | 5.29067400  | -1.33846300 | 0.26551700  |
| H | 0.96388600  | -0.52280400 | -1.81196900 |
| H | 5.41841900  | -2.24769000 | -1.70084200 |
| H | 3.11903500  | -1.61621400 | -2.35434200 |
| C | 1.34046500  | -0.24306800 | -0.82951600 |
| C | 2.33057100  | 0.46531900  | 1.68600200  |
| H | 4.88440300  | -0.36120300 | 2.13084600  |
| H | 6.30283000  | -1.62094100 | 0.54234500  |
| C | 1.05359100  | 0.81492700  | 1.31701100  |
| C | 0.53055000  | 0.45827000  | 0.04102800  |
| H | 2.71405100  | 0.74903500  | 2.66360200  |
| H | 0.43355800  | 1.38800500  | 2.00123100  |
| C | -0.89855400 | 0.84067300  | -0.34242500 |
| H | -1.02588900 | 0.56178300  | -1.39579000 |
| C | -1.94416600 | 0.04794100  | 0.47995900  |
| H | -1.77098500 | 0.23127800  | 1.54912700  |
| H | -2.94256100 | 0.44968100  | 0.25589300  |
| C | -3.35442200 | -4.07100900 | -0.29211200 |
| C | -2.48908200 | -3.38896100 | -1.36163400 |
| C | -2.43923900 | -1.86504700 | -1.16348800 |
| C | -1.95658000 | -1.47547300 | 0.24868200  |
| C | -2.83087100 | -2.17263700 | 1.31115900  |
| C | -2.88326100 | -3.69635700 | 1.12066600  |
| H | -1.79348300 | -1.41833900 | -1.93006900 |
| H | -1.46698000 | -3.79268700 | -1.31054500 |
| H | -2.86685700 | -3.62438200 | -2.36509500 |
| H | -4.40135100 | -3.75720900 | -0.41983000 |
| H | -3.33640100 | -5.16051300 | -0.42452600 |
| H | -0.92849800 | -1.84967000 | 0.36842800  |
| H | -2.45478500 | -1.93221500 | 2.31482600  |
| H | -3.85285900 | -1.76551800 | 1.25669100  |
| H | -1.88034600 | -4.11558400 | 1.28992800  |
| H | -3.54081700 | -4.14777600 | 1.87489500  |

|   |             |             |             |
|---|-------------|-------------|-------------|
| H | -3.44506900 | -1.44535100 | -1.32271500 |
| C | -1.09189600 | 2.35936500  | -0.27728100 |
| C | -0.51612000 | 3.15549900  | -1.28028800 |
| C | -1.80317100 | 3.00162300  | 0.74441100  |
| C | -0.64597500 | 4.54261500  | -1.26690300 |
| H | 0.04587800  | 2.67590300  | -2.07886700 |
| C | -1.93428400 | 4.39381100  | 0.76362000  |
| H | -2.26958700 | 2.41980200  | 1.53336800  |
| C | -1.35778900 | 5.16983700  | -0.24057700 |
| H | -0.19335600 | 5.13480900  | -2.05818000 |
| H | -2.49270400 | 4.86836700  | 1.56662900  |
| H | -1.46234700 | 6.25144500  | -0.22697000 |

### TS10

|    |             |             |             |
|----|-------------|-------------|-------------|
| Ni | -0.95017200 | -0.67207400 | -0.27131000 |
| I  | -2.56230900 | 0.90577100  | -1.50533900 |
| C  | -4.99933600 | -2.63412800 | 2.14257700  |
| C  | -5.19659500 | -1.11338000 | 2.09258000  |
| C  | -3.96012300 | -0.40230100 | 1.46463500  |
| C  | -3.72486000 | -1.02083800 | 0.11571600  |
| C  | -3.43324800 | -2.49814200 | 0.12400400  |
| C  | -4.67892700 | -3.19868700 | 0.75251400  |
| H  | -4.14525000 | 0.67205300  | 1.38666700  |
| H  | -6.09156300 | -0.87361600 | 1.50267300  |
| H  | -5.35930500 | -0.70432700 | 3.09738000  |
| H  | -4.17650700 | -2.87287200 | 2.83173400  |
| H  | -5.89715600 | -3.11785700 | 2.54714100  |
| H  | -4.50641700 | -0.77445400 | -0.59632000 |
| H  | -3.27405000 | -2.88687700 | -0.88412400 |
| H  | -2.55067900 | -2.73275600 | 0.72596500  |
| H  | -5.54361600 | -3.06390900 | 0.08852600  |
| H  | -4.47980500 | -4.27660200 | 0.80018300  |
| H  | -3.10295100 | -0.55487500 | 2.12673400  |
| C  | 5.82567300  | -3.57757600 | 1.24730000  |
| C  | 4.45347600  | -3.67701400 | 1.17463700  |
| C  | 3.71593400  | -2.90894400 | 0.23280300  |
| C  | 4.42763000  | -2.02760000 | -0.64413800 |
| C  | 5.84075600  | -1.94778600 | -0.54489000 |
| C  | 6.52743000  | -2.70484500 | 0.38002800  |
| H  | 1.77415700  | -3.67337400 | 0.78893100  |
| H  | 6.37618300  | -4.17073400 | 1.97269800  |
| H  | 3.91423100  | -4.34755800 | 1.84002700  |
| C  | 2.30273800  | -2.98832800 | 0.12789000  |
| C  | 3.67878800  | -1.26642100 | -1.58486900 |
| H  | 6.37541700  | -1.27719400 | -1.21394700 |
| H  | 7.60977800  | -2.63552300 | 0.44672900  |
| C  | 2.31139200  | -1.36486400 | -1.65810000 |
| C  | 1.58392300  | -2.24106500 | -0.79443800 |
| H  | 4.21065300  | -0.59515200 | -2.25547000 |
| H  | 1.77370400  | -0.76292400 | -2.38361100 |
| C  | 0.11803000  | -2.39667900 | -0.87729600 |
| H  | -0.27288500 | -3.20471100 | -0.26042100 |
| C  | -0.70203500 | -1.88727300 | -1.88397700 |
| H  | -0.29387000 | -1.29570600 | -2.69905000 |
| H  | -1.65265600 | -2.36124800 | -2.10608400 |
| C  | 1.30870500  | 6.34528800  | 0.55201500  |
| C  | 0.42320700  | 5.32761400  | 0.82914800  |
| C  | 0.84665100  | 3.96988800  | 0.82078900  |
| C  | 2.21634800  | 3.67716800  | 0.51697800  |
| C  | 3.10400500  | 4.74841400  | 0.23634900  |
| C  | 2.66285700  | 6.05393700  | 0.25303200  |
| H  | -1.07631300 | 3.13202900  | 1.32958200  |
| H  | 0.97105700  | 7.37829500  | 0.56095000  |

|   |             |             |            |
|---|-------------|-------------|------------|
| H | -0.61696800 | 5.54896500  | 1.05715400 |
| C | -0.03765000 | 2.89959600  | 1.10395500 |
| C | 2.62852800  | 2.31634000  | 0.51254600 |
| H | 4.14267800  | 4.52078200  | 0.00696100 |
| H | 3.35229600  | 6.86559200  | 0.03639000 |
| C | 1.74627700  | 1.30155600  | 0.79175900 |
| C | 0.37850600  | 1.57609600  | 1.09684300 |
| H | 3.66608600  | 2.08347200  | 0.28386200 |
| H | 2.09774600  | 0.27587800  | 0.77775300 |
| C | -0.59030800 | 0.51168500  | 1.42361700 |
| H | -1.55978000 | 0.88456800  | 1.74292000 |
| C | -0.28030700 | -0.82667500 | 1.65645100 |
| H | 0.74501600  | -1.18326200 | 1.66792100 |
| H | -0.98681900 | -1.45413400 | 2.19705800 |

### TS11

|    |             |             |             |
|----|-------------|-------------|-------------|
| Ni | -0.09674900 | -0.66232600 | 1.24343800  |
| I  | -0.41825400 | -0.07233400 | 3.69418100  |
| C  | 6.57099100  | -2.52825500 | -0.90865100 |
| C  | 5.66386900  | -1.83705900 | -0.13663300 |
| C  | 4.49520600  | -1.27321600 | -0.71878700 |
| C  | 4.27613600  | -1.43703000 | -2.12606900 |
| C  | 5.23020700  | -2.15323400 | -2.89350800 |
| C  | 6.35315700  | -2.68807700 | -2.29943400 |
| H  | 3.71306400  | -0.43668600 | 1.11400100  |
| H  | 7.45994300  | -2.95482000 | -0.45231500 |
| H  | 5.82888000  | -1.71328200 | 0.93091700  |
| C  | 3.54230800  | -0.55536000 | 0.04586500  |
| C  | 3.10735200  | -0.86294500 | -2.69963200 |
| H  | 5.06098700  | -2.27410300 | -3.96093700 |
| H  | 7.07689600  | -3.23555100 | -2.89684800 |
| C  | 2.20101200  | -0.17408800 | -1.93158600 |
| C  | 2.39813600  | -0.01043000 | -0.52494900 |
| H  | 2.94444400  | -0.96991800 | -3.76963000 |
| H  | 1.33156800  | 0.27255800  | -2.40496600 |
| C  | 1.45211400  | 0.71956700  | 0.32604500  |
| H  | 1.83131500  | 0.99189200  | 1.30977100  |
| C  | 0.25233700  | 1.28027600  | -0.06646500 |
| H  | -0.21674000 | 1.04975400  | -1.01627500 |
| H  | -0.34708200 | 1.83026000  | 0.65081900  |
| C  | 0.02609100  | 6.33092500  | -0.70787000 |
| C  | 1.40859000  | 5.79235600  | -0.30614000 |
| C  | 1.33058000  | 4.29199200  | 0.08647800  |
| C  | 0.67677200  | 3.51295100  | -1.01662400 |
| C  | -0.68011500 | 3.99451400  | -1.44158400 |
| C  | -0.60811500 | 5.49662300  | -1.83231100 |
| H  | 2.32925000  | 3.90326100  | 0.31500400  |
| H  | 2.10596200  | 5.90954900  | -1.14749400 |
| H  | 1.81968400  | 6.37211700  | 0.53017300  |
| H  | -0.63648300 | 6.31798100  | 0.17012700  |
| H  | 0.10784000  | 7.37971200  | -1.02071300 |
| H  | 1.32928900  | 3.11577300  | -1.79367500 |
| H  | -1.07678700 | 3.40455700  | -2.27659400 |
| H  | -1.39295500 | 3.89468600  | -0.60823400 |
| H  | -0.00911000 | 5.60067800  | -2.74775700 |
| H  | -1.61478800 | 5.86582900  | -2.06700200 |
| H  | 0.73368000  | 4.21303200  | 1.00804900  |
| C  | -5.81995400 | -0.71597200 | -3.40181500 |
| C  | -4.46111500 | -0.83933200 | -3.21437700 |
| C  | -3.93673200 | -1.29857200 | -1.97525800 |
| C  | -4.84744400 | -1.63521600 | -0.92125600 |
| C  | -6.24154500 | -1.49570600 | -1.14565200 |
| C  | -6.71898400 | -1.04625500 | -2.35791000 |

|   |             |             |             |
|---|-------------|-------------|-------------|
| H | -1.85874600 | -1.18388100 | -2.55314700 |
| H | -6.20850800 | -0.36397500 | -4.35359300 |
| H | -3.76927500 | -0.58680200 | -4.01475800 |
| C | -2.54472800 | -1.43464200 | -1.74571700 |
| C | -4.31368400 | -2.09753500 | 0.31389500  |
| H | -6.92913100 | -1.75012700 | -0.34257400 |
| H | -7.78877100 | -0.94399100 | -2.51799900 |
| C | -2.96037800 | -2.22582100 | 0.50405800  |
| C | -2.03908200 | -1.89252700 | -0.53695700 |
| H | -4.99995100 | -2.34861500 | 1.11891900  |
| H | -2.58724200 | -2.56965000 | 1.46360300  |
| C | -0.58136200 | -2.01166700 | -0.36889800 |
| H | 0.00988300  | -1.69050000 | -1.22431000 |
| C | 0.08711500  | -2.65281000 | 0.65776800  |
| H | -0.43555700 | -3.19598800 | 1.44055000  |
| H | 1.15246700  | -2.84566600 | 0.57289300  |

### TS2-*t*Bu

|   |             |             |             |
|---|-------------|-------------|-------------|
| C | -4.59446400 | 0.95772000  | 0.56827300  |
| C | -3.36452400 | 1.48191700  | 0.23551100  |
| C | -2.27602400 | 0.63113400  | -0.10238000 |
| C | -2.48295400 | -0.78716700 | -0.09035900 |
| C | -3.76010000 | -1.29547800 | 0.25586300  |
| C | -4.79606800 | -0.44398300 | 0.57902800  |
| H | -0.85221900 | 2.21454500  | -0.45430700 |
| H | -5.41686300 | 1.62050800  | 0.82426800  |
| H | -3.20889100 | 2.55835500  | 0.22667200  |
| C | -0.99835700 | 1.13586600  | -0.44798700 |
| C | -1.38682700 | -1.63019600 | -0.43198500 |
| H | -3.91084000 | -2.37275400 | 0.26254600  |
| H | -5.77061900 | -0.84575500 | 0.84283800  |
| C | -0.16200500 | -1.11027600 | -0.76235800 |
| C | 0.06863500  | 0.30370200  | -0.77689700 |
| H | -1.53799100 | -2.70752300 | -0.42949100 |
| H | 0.64875800  | -1.78374600 | -1.02247700 |
| C | 1.35322100  | 0.88799000  | -1.13566400 |
| H | 1.37396800  | 1.97752600  | -1.14019100 |
| C | 2.51745800  | 0.23059600  | -1.41477100 |
| H | 2.54886600  | -0.84541900 | -1.55602200 |
| H | 3.35868800  | 0.78100000  | -1.82263900 |
| C | 3.85829000  | -0.05505500 | 0.56387200  |
| C | 2.97810800  | -0.93715500 | 1.40365500  |
| H | 2.82458400  | -1.92062700 | 0.94349200  |
| H | 3.42909200  | -1.11548500 | 2.39666400  |
| H | 1.99590800  | -0.48207000 | 1.57414600  |
| C | 5.07463200  | -0.69346000 | -0.04802900 |
| H | 5.55037500  | -0.04101500 | -0.79059400 |
| H | 5.83916000  | -0.91025800 | 0.71987000  |
| H | 4.83575900  | -1.64823400 | -0.53265600 |
| C | 3.99892000  | 1.37007700  | 1.02085600  |
| H | 4.58362600  | 1.43075500  | 1.95619900  |
| H | 4.51911400  | 1.98865200  | 0.27930400  |
| H | 3.02187300  | 1.82416100  | 1.22260700  |

### TS7-*t*Bu-1

|    |             |             |             |
|----|-------------|-------------|-------------|
| Ni | 0.22305400  | 1.98553100  | 0.55651200  |
| C  | 0.93359500  | 3.13361300  | -1.10885300 |
| C  | -5.63638100 | -2.54904700 | 0.95636500  |
| C  | -4.96912800 | -1.39118600 | 1.28832200  |
| C  | -4.00766700 | -0.83295000 | 0.40218200  |
| C  | -3.74380600 | -1.49227000 | -0.84395500 |
| C  | -4.44846500 | -2.68215800 | -1.15602800 |
| C  | -5.37430200 | -3.19933700 | -0.27484000 |

|   |             |             |             |
|---|-------------|-------------|-------------|
| H | -3.51941800 | 0.85871700  | 1.64935800  |
| H | -6.37039500 | -2.96838300 | 1.63793300  |
| H | -5.17169600 | -0.88869800 | 2.23071200  |
| C | -3.30315400 | 0.35731900  | 0.70772000  |
| C | -2.78419600 | -0.91909800 | -1.72540500 |
| H | -4.25084900 | -3.17946900 | -2.10206400 |
| H | -5.91062400 | -4.11032100 | -0.52341600 |
| C | -2.11808800 | 0.23755000  | -1.40240100 |
| C | -2.36930400 | 0.90634500  | -0.16459000 |
| H | -2.58903500 | -1.41117700 | -2.67496400 |
| H | -1.39870800 | 0.64863500  | -2.10363700 |
| C | -1.67986100 | 2.14640900  | 0.22546600  |
| H | -2.06852400 | 2.59677500  | 1.13993800  |
| C | -1.07237300 | 3.08140600  | -0.70743300 |
| H | -1.26741100 | 2.90192600  | -1.76031700 |
| H | -1.16948700 | 4.12561400  | -0.42502400 |
| C | 3.89529900  | -3.86362500 | -1.38631800 |
| C | 2.73158100  | -3.23838700 | -0.99773900 |
| C | 2.76441200  | -2.17495500 | -0.05459700 |
| C | 4.02687800  | -1.76236500 | 0.48866900  |
| C | 5.20562100  | -2.42741400 | 0.06866900  |
| C | 5.14085600  | -3.45486000 | -0.84924900 |
| H | 0.63157100  | -1.82825300 | -0.03640300 |
| H | 3.86293100  | -4.67699200 | -2.10497200 |
| H | 1.77351100  | -3.55312800 | -1.40349900 |
| C | 1.58943100  | -1.51056100 | 0.37116500  |
| C | 4.04710900  | -0.70577700 | 1.44419000  |
| H | 6.16170500  | -2.11888300 | 0.48305300  |
| H | 6.04979500  | -3.95942200 | -1.16319200 |
| C | 2.89227200  | -0.07875900 | 1.83961400  |
| C | 1.62848700  | -0.47156900 | 1.29684800  |
| H | 5.00038000  | -0.41158400 | 1.87560800  |
| H | 2.93897900  | 0.69608400  | 2.59936500  |
| C | 0.36560700  | 0.16203500  | 1.68675200  |
| H | -0.53101800 | -0.37269700 | 1.38057600  |
| C | 0.19858700  | 1.27013700  | 2.50042100  |
| H | 1.03644800  | 1.74555700  | 3.00595800  |
| H | -0.78243800 | 1.49774000  | 2.90554300  |
| C | 1.22498200  | 1.98957900  | -2.08482800 |
| H | 1.27955700  | 1.00851800  | -1.60026900 |
| H | 0.47666300  | 1.94111600  | -2.88128400 |
| H | 2.19802900  | 2.16814100  | -2.56240700 |
| C | 0.84233000  | 4.47887400  | -1.83132200 |
| H | 0.09004000  | 4.47426000  | -2.62513900 |
| H | 0.62526700  | 5.30447500  | -1.14697900 |
| H | 1.81333500  | 4.68446000  | -2.29969600 |
| C | 1.99796400  | 3.23862400  | -0.00184100 |
| H | 1.89278600  | 4.14159900  | 0.60462000  |
| H | 2.09888500  | 2.35663000  | 0.68000600  |
| H | 2.98451100  | 3.24847400  | -0.48364500 |

### TS7-*t*Bu-2

|    |             |             |             |
|----|-------------|-------------|-------------|
| Ni | -0.89332700 | 1.57474000  | -0.24785800 |
| C  | -1.20550800 | 3.69174500  | -0.13678000 |
| C  | 6.18381800  | -1.30030000 | -0.72598700 |
| C  | 4.95512700  | -1.00553200 | -1.27477100 |
| C  | 4.11207900  | -0.02830900 | -0.67846300 |
| C  | 4.56152300  | 0.64888900  | 0.50160100  |
| C  | 5.83144800  | 0.32245500  | 1.04233400  |
| C  | 6.62538000  | -0.63153500 | 0.44226000  |
| H  | 2.51153600  | -0.21858600 | -2.11309900 |
| H  | 6.82301200  | -2.04560100 | -1.19042100 |
| H  | 4.61613000  | -1.51272600 | -2.17457200 |

|             |             |             |             |    |             |             |             |
|-------------|-------------|-------------|-------------|----|-------------|-------------|-------------|
| C           | 2.84066900  | 0.29722400  | -1.21466200 | Zn | 3.03040800  | 0.82879200  | 0.43519900  |
| C           | 3.71234700  | 1.63193000  | 1.08256600  | C  | 1.42294100  | 0.38879400  | 1.67842500  |
| H           | 6.17132300  | 0.83833400  | 1.93675600  | C  | 1.66480100  | -0.06818400 | 2.99400200  |
| H           | 7.59737700  | -0.87259100 | 0.86256400  | C  | 0.09817100  | 0.79054700  | 1.38849100  |
| C           | 2.48994500  | 1.93169300  | 0.53345800  | C  | 0.66446500  | -0.08154900 | 3.96981100  |
| C           | 2.02348700  | 1.26043300  | -0.63812400 | H  | 2.66960000  | -0.38105100 | 3.27420200  |
| H           | 4.05030700  | 2.15235000  | 1.97528000  | C  | -0.92191300 | 0.76816300  | 2.35961600  |
| H           | 1.87177300  | 2.69090200  | 1.00036200  | H  | -0.11857700 | 1.25717300  | 0.43143400  |
| C           | 0.73682400  | 1.58524200  | -1.28582600 | C  | -0.63459200 | 0.34052500  | 3.65559800  |
| H           | 0.52299900  | 0.96273900  | -2.15566100 | H  | 0.89798400  | -0.40041600 | 4.98352500  |
| C           | 0.22081400  | 2.95031500  | -1.36703800 | H  | -1.91784600 | 1.12149800  | 2.10391000  |
| H           | 0.89960400  | 3.72694600  | -1.02636100 | H  | -1.40546200 | 0.35484000  | 4.42288300  |
| H           | -0.26525300 | 3.19166600  | -2.30859700 | I  | 5.50457300  | 0.23772300  | 1.21963200  |
| C           | -0.49678800 | 4.06948900  | 1.16625300  | C  | -7.11372100 | -3.17280800 | -1.20469200 |
| H           | -0.27868500 | 3.20114600  | 1.79831200  | C  | -5.77347600 | -3.48660700 | -1.18255100 |
| H           | 0.44185400  | 4.59866400  | 0.97768500  | C  | -4.92056300 | -2.95386800 | -0.17667800 |
| H           | -1.13994200 | 4.74357400  | 1.74736600  | C  | -5.47872000 | -2.08459200 | 0.81818400  |
| C           | -2.53583700 | 2.97160700  | 0.13442200  | C  | -6.86461900 | -1.78323800 | 0.76822800  |
| H           | -3.18562900 | 2.92338200  | -0.74179700 | C  | -7.66421600 | -2.31409200 | -0.22082100 |
| H           | -2.47808500 | 1.92907600  | 0.57116800  | H  | -3.12186900 | -3.92284800 | -0.87371900 |
| H           | -3.05931900 | 3.49450300  | 0.94441100  | H  | -7.75643200 | -3.58428200 | -1.97765100 |
| C           | -1.47402500 | 4.92069100  | -1.00797900 | H  | -5.34888700 | -4.14658900 | -1.93508900 |
| H           | -0.55622800 | 5.46932400  | -1.23922600 | C  | -3.53731400 | -3.25399900 | -0.12207700 |
| H           | -1.97156800 | 4.66052700  | -1.94728600 | C  | -4.61715400 | -1.56460600 | 1.82461300  |
| H           | -2.13649400 | 5.60227800  | -0.45931400 | H  | -7.28716400 | -1.12836700 | 1.52640300  |
| P           | -1.28499300 | -0.60395800 | 0.05916800  | H  | -8.72395800 | -2.07697000 | -0.24908500 |
| C           | -3.02180400 | -0.86765000 | -0.49757600 | C  | -3.27855700 | -1.87048900 | 1.84908200  |
| C           | -3.94327800 | -1.63815300 | 0.22704400  | C  | -2.70631200 | -2.72643700 | 0.85949800  |
| C           | -3.43574600 | -0.25535200 | -1.69495700 | H  | -5.03997400 | -0.91932700 | 2.59097000  |
| C           | -5.24850900 | -1.79838800 | -0.24297100 | H  | -2.64935700 | -1.46226100 | 2.63139100  |
| H           | -3.64942100 | -2.11063100 | 1.15832400  | C  | -1.28451300 | -3.10362700 | 0.85534800  |
| C           | -4.73729800 | -0.42688500 | -2.16663000 | H  | -1.05911700 | -3.94200300 | 0.19978900  |
| H           | -2.73520100 | 0.35070100  | -2.26593000 | C  | -0.30242700 | -2.71904800 | 1.77736300  |
| C           | -5.64686800 | -1.19787300 | -1.43844100 | H  | -0.52534300 | -2.05206500 | 2.60561700  |
| H           | -5.95368400 | -2.39538900 | 0.32794200  | H  | 0.59389200  | -3.31943700 | 1.89706800  |
| H           | -5.04129900 | 0.04269500  | -3.09778600 | C  | 3.22753800  | -3.49675100 | -2.65545800 |
| H           | -6.66258300 | -1.32682300 | -1.80053900 | C  | 3.56831300  | -3.13951400 | -1.20478100 |
| C           | -1.22170400 | -1.10465800 | 1.82312600  | C  | 2.50269100  | -2.18806500 | -0.58879700 |
| C           | -1.19881600 | -2.45858300 | 2.20216800  | C  | 1.12186100  | -2.80959000 | -0.71953200 |
| C           | -1.23063400 | -0.11885600 | 2.82208300  | C  | 0.76031400  | -3.10938100 | -2.16923200 |
| C           | -1.19363900 | -2.81069100 | 3.55189800  | C  | 1.81250600  | -4.07808500 | -2.77151500 |
| H           | -1.17586700 | -3.23677500 | 1.44559000  | H  | 2.76391200  | -1.99520800 | 0.45637800  |
| C           | -1.22484700 | -0.47369200 | 4.17159600  | H  | 3.62141900  | -4.05377500 | -0.59712700 |
| H           | -1.23540500 | 0.93271600  | 2.54735900  | H  | 4.54570600  | -2.64937000 | -1.13366400 |
| C           | -1.20734000 | -1.82050200 | 4.53753400  | H  | 3.30382700  | -2.59568000 | -3.27972300 |
| H           | -1.17528300 | -3.85952400 | 3.83319500  | H  | 3.96089700  | -4.21303700 | -3.04701000 |
| H           | -1.22790400 | 0.29963600  | 4.93416900  | H  | 1.07058200  | -3.73399600 | -0.13395700 |
| H           | -1.19909600 | -2.09862400 | 5.58730400  | H  | -0.23844100 | -3.55792300 | -2.25194500 |
| C           | -0.28428900 | -1.86690200 | -0.82377100 | H  | 0.76511400  | -2.19068800 | -2.76699400 |
| C           | -0.73390300 | -2.45517200 | -2.01647400 | H  | 1.76159900  | -5.04196900 | -2.24508800 |
| C           | 0.97074500  | -2.23346000 | -0.30781900 | H  | 1.55536200  | -4.27467500 | -3.81997700 |
| C           | 0.05644300  | -3.39764600 | -2.67667800 | H  | 2.54201100  | -1.23871200 | -1.14125900 |
| H           | -1.70583700 | -2.19752900 | -2.42402400 | C  | -5.67138800 | 4.93167800  | 0.53983600  |
| C           | 1.75087600  | -3.18426400 | -0.96674800 | C  | -5.36132200 | 3.60980500  | 0.31165000  |
| H           | 1.33577300  | -1.79262900 | 0.61434300  | C  | -4.10252500 | 3.24486500  | -0.24019300 |
| C           | 1.29689700  | -3.76609100 | -2.15253400 | C  | -3.15728200 | 4.27486700  | -0.55968600 |
| H           | -0.30599600 | -3.85238800 | -3.59402200 | C  | -3.50805400 | 5.62676600  | -0.31236900 |
| H           | 2.71504500  | -3.46420100 | -0.55285300 | C  | -4.73591400 | 5.94845700  | 0.22563700  |
| H           | 1.90456800  | -4.50782400 | -2.66282400 | H  | -4.46727800 | 1.11512400  | -0.24562600 |
|             |             |             |             | H  | -6.63568200 | 5.20109700  | 0.96153300  |
|             |             |             |             | H  | -6.07636800 | 2.82563000  | 0.54922600  |
|             |             |             |             | C  | -3.74910400 | 1.89642200  | -0.48705900 |
|             |             |             |             | C  | -1.90218300 | 3.90147400  | -1.11933100 |
|             |             |             |             | H  | -2.79065800 | 6.40684600  | -0.55408300 |
| <b>TS12</b> |             |             |             |    |             |             |             |
| Ni          | -0.05766800 | -1.53120600 | 0.18334600  |    |             |             |             |
| I           | 2.49837100  | 1.89674200  | -2.00426700 |    |             |             |             |

|   |             |             |             |
|---|-------------|-------------|-------------|
| H | -4.99205300 | 6.98786200  | 0.41111000  |
| C | -1.58601700 | 2.58698900  | -1.35151100 |
| C | -2.51443000 | 1.54870900  | -1.02660400 |
| H | -1.18573600 | 4.67995300  | -1.36829000 |
| H | -0.62232900 | 2.33957200  | -1.78606900 |
| C | -2.23289600 | 0.13799400  | -1.25966000 |
| H | -3.07423700 | -0.52649600 | -1.06673500 |
| C | -1.07947900 | -0.43647000 | -1.69664500 |
| H | -0.21137200 | 0.14475300  | -2.00431600 |
| H | -1.12679600 | -1.47416700 | -2.00915500 |

### CP12

|    |             |             |             |
|----|-------------|-------------|-------------|
| Ni | -0.24483300 | -1.25488200 | 0.29355500  |
| C  | 1.24752900  | -2.06016200 | -0.55317400 |
| C  | 1.28275500  | -2.54350900 | -1.87320000 |
| C  | 2.45319700  | -2.08697300 | 0.17121600  |
| C  | 2.46591400  | -3.02058300 | -2.44907100 |
| H  | 0.37574400  | -2.55236000 | -2.47574600 |
| C  | 3.64054500  | -2.56008700 | -0.39776900 |
| H  | 2.47625400  | -1.73846600 | 1.20247100  |
| C  | 3.65262300  | -3.03065100 | -1.71238100 |
| H  | 2.45779700  | -3.38800600 | -3.47366800 |
| H  | 4.55628000  | -2.56252500 | 0.19014400  |
| H  | 4.57254300  | -3.40433500 | -2.15547600 |
| C  | -6.28287000 | 2.93722800  | -1.66527900 |
| C  | -5.62540300 | 1.81736900  | -1.20737600 |
| C  | -4.53125900 | 1.93464900  | -0.30663900 |
| C  | -4.12349600 | 3.24108600  | 0.11961200  |
| C  | -4.82347900 | 4.37479200  | -0.36875400 |
| C  | -5.87874700 | 4.22794400  | -1.24262900 |
| H  | -4.15118700 | -0.18526400 | -0.13906900 |
| H  | -7.11681100 | 2.83491200  | -2.35416700 |
| H  | -5.93423800 | 0.82590900  | -1.53002400 |
| C  | -3.83180800 | 0.80391000  | 0.18424800  |
| C  | -3.03741000 | 3.34648200  | 1.03175300  |
| H  | -4.51211200 | 5.36408100  | -0.04185800 |
| H  | -6.40619800 | 5.10320400  | -1.61160500 |
| C  | -2.37868200 | 2.23043800  | 1.48708100  |
| C  | -2.75627400 | 0.92178300  | 1.05506100  |
| H  | -2.74181200 | 4.33330700  | 1.38020400  |
| H  | -1.57935800 | 2.33908100  | 2.21442600  |
| C  | -2.09062600 | -0.29297700 | 1.54824900  |
| H  | -2.70076900 | -1.19074400 | 1.48345600  |
| C  | -0.88294300 | -0.38095100 | 2.19041800  |
| H  | -0.26978600 | 0.49886500  | 2.36902600  |
| H  | -0.61959200 | -1.26069200 | 2.76675500  |
| C  | -1.61592200 | -5.93280100 | 0.51985400  |
| C  | -0.71626600 | -5.42946400 | 1.65905500  |
| C  | 0.07155900  | -4.17237900 | 1.23332400  |
| C  | -0.87632600 | -3.06322300 | 0.76534800  |
| C  | -1.76807000 | -3.55696800 | -0.38380900 |
| C  | -2.55461700 | -4.82636000 | 0.01606600  |
| H  | 0.69349400  | -3.82281400 | 2.06837700  |
| H  | -1.33908300 | -5.19497700 | 2.53606800  |
| H  | -0.02132500 | -6.22078000 | 1.97181700  |
| H  | -0.98252900 | -6.27341200 | -0.31283800 |
| H  | -2.19819500 | -6.80506000 | 0.84609400  |
| H  | -1.53328800 | -2.83456400 | 1.62092700  |
| H  | -2.47816000 | -2.77814100 | -0.70041500 |
| H  | -1.14575000 | -3.78905200 | -1.25798500 |
| H  | -3.27160700 | -4.57099700 | 0.81114800  |
| H  | -3.14751200 | -5.18582400 | -0.83649200 |
| H  | 0.76289800  | -4.44557000 | 0.42840200  |

|   |             |             |             |
|---|-------------|-------------|-------------|
| C | 5.44205000  | 4.18184000  | 1.44138000  |
| C | 4.11541300  | 3.81221800  | 1.42624300  |
| C | 3.63765200  | 2.85479100  | 0.49014200  |
| C | 4.55955800  | 2.27831100  | -0.44311300 |
| C | 5.91970500  | 2.68019800  | -0.40136700 |
| C | 6.35302700  | 3.61020100  | 0.51920200  |
| H | 1.58194700  | 2.90366900  | 1.14635900  |
| H | 5.79556900  | 4.91432500  | 2.16198600  |
| H | 3.41347500  | 4.24927900  | 2.13291900  |
| C | 2.27995900  | 2.45197800  | 0.44335300  |
| C | 4.07084500  | 1.32158300  | -1.37633200 |
| H | 6.61744800  | 2.24015500  | -1.11000000 |
| H | 7.39752600  | 3.90911800  | 0.54099400  |
| C | 2.74993000  | 0.95156000  | -1.39684100 |
| C | 1.81688200  | 1.52037900  | -0.47672200 |
| H | 4.76892000  | 0.87334700  | -2.07902600 |
| H | 2.41452700  | 0.20545500  | -2.10821000 |
| C | 0.38797300  | 1.19956600  | -0.48597700 |
| H | -0.19915400 | 1.75646400  | 0.23984000  |
| C | -0.28929200 | 0.37893200  | -1.33488200 |
| H | 0.19345600  | -0.11604000 | -2.16876200 |
| H | -1.37585900 | 0.38425200  | -1.33334900 |

### TS13

|   |             |             |             |
|---|-------------|-------------|-------------|
| C | -7.34871400 | -1.66030600 | 1.25742000  |
| C | -6.40074200 | -0.66215100 | 1.21202200  |
| C | -5.45421600 | -0.60595600 | 0.15279200  |
| C | -5.50235000 | -1.60694100 | -0.87118500 |
| C | -6.49076700 | -2.62163800 | -0.79595200 |
| C | -7.39458700 | -2.64949700 | 0.24450500  |
| H | -4.43676600 | 1.16337100  | 0.85563300  |
| H | -8.06643300 | -1.69282100 | 2.07259400  |
| H | -6.36329300 | 0.09822200  | 1.98865900  |
| C | -4.46473500 | 0.40564300  | 0.07461600  |
| C | -4.55193700 | -1.53913700 | -1.92848100 |
| H | -6.52370800 | -3.38004500 | -1.57468400 |
| H | -8.14693500 | -3.43204200 | 0.29165600  |
| C | -3.60827000 | -0.54425200 | -1.97641200 |
| C | -3.54311600 | 0.45947300  | -0.96184700 |
| H | -4.58519900 | -2.29550500 | -2.70922900 |
| H | -2.90013200 | -0.52079000 | -2.79788900 |
| C | -2.56282600 | 1.54880800  | -0.98569900 |
| H | -2.62738400 | 2.23458700  | -0.14359300 |
| C | -1.64640200 | 1.81745500  | -1.94862900 |
| H | -1.60327800 | 1.26253300  | -2.87845100 |
| H | -1.07054200 | 2.73608200  | -1.91850100 |
| C | 7.30945900  | -1.56068800 | -0.25306100 |
| C | 6.26236100  | -0.87193700 | -0.82475100 |
| C | 4.92598000  | -1.34186300 | -0.70076600 |
| C | 4.68670800  | -2.55129200 | 0.02975400  |
| C | 5.78666800  | -3.23822000 | 0.60546200  |
| C | 7.07070800  | -2.75554400 | 0.46963000  |
| H | 4.02144400  | 0.24333500  | -1.85351200 |
| H | 8.32558300  | -1.18894900 | -0.35545900 |
| H | 6.44492000  | 0.04485200  | -1.38104000 |
| C | 3.82477900  | -0.66137200 | -1.28043200 |
| C | 3.34622800  | -3.01453300 | 0.14274800  |
| H | 5.59897700  | -4.15603600 | 1.15833100  |
| H | 7.90489700  | -3.29037700 | 0.91566100  |
| C | 2.30190200  | -2.32630300 | -0.42267600 |
| C | 2.51966700  | -1.11994600 | -1.15695800 |
| H | 3.15623500  | -3.93385300 | 0.69232600  |
| H | 1.29130600  | -2.70490400 | -0.31124800 |

|    |             |             |             |
|----|-------------|-------------|-------------|
| C  | 1.42540200  | -0.38874700 | -1.81718400 |
| H  | 1.77781400  | 0.35620500  | -2.53359500 |
| C  | 0.08993600  | -0.80434100 | -1.95176000 |
| H  | -0.26605200 | -1.71382200 | -1.47138100 |
| H  | -0.45864900 | -0.52625800 | -2.84733600 |
| Ni | 0.11188400  | 0.70551900  | -0.61987500 |
| C  | 0.34800600  | 0.54152300  | 1.24225600  |
| C  | 1.44861800  | -0.12539600 | 1.82502800  |
| C  | -0.89158400 | 0.46868700  | 1.91095700  |
| C  | 1.28849200  | -0.90989300 | 2.96352400  |
| H  | 2.43262900  | -0.03188400 | 1.37644700  |
| C  | -1.04963600 | -0.33580200 | 3.04555800  |
| H  | -1.74848100 | 1.01849600  | 1.53820900  |
| C  | 0.03572400  | -1.02960800 | 3.57778600  |
| H  | 2.14985300  | -1.42980900 | 3.37652500  |
| H  | -2.02634700 | -0.40139200 | 3.51985000  |
| H  | -0.08335800 | -1.63728200 | 4.47077400  |
| C  | 1.39611600  | 5.24978200  | 0.01768600  |
| C  | 0.49328300  | 4.79500700  | 1.17301900  |
| C  | -0.17910500 | 3.44180900  | 0.86087800  |
| C  | 0.86978800  | 2.37255100  | 0.53169800  |
| C  | 1.77960500  | 2.80976700  | -0.64379200 |
| C  | 2.43578500  | 4.17570400  | -0.32825900 |
| H  | -0.78593300 | 3.12835400  | 1.71773200  |
| H  | 1.09412200  | 4.69693900  | 2.08883300  |
| H  | -0.27422500 | 5.55240900  | 1.38085700  |
| H  | 0.77543900  | 5.45350600  | -0.86835200 |
| H  | 1.89552500  | 6.19396900  | 0.27068700  |
| H  | 1.54168700  | 2.32485600  | 1.39071800  |
| H  | 2.56508900  | 2.06705700  | -0.81460100 |
| H  | 1.21699600  | 2.90509400  | -1.58316500 |
| H  | 3.12362000  | 4.05047800  | 0.52057300  |
| H  | 3.04686500  | 4.49359200  | -1.18370300 |
| H  | -0.86640600 | 3.59221600  | 0.01919200  |

**4**

|   |             |             |             |
|---|-------------|-------------|-------------|
| C | -0.92064000 | -0.19367400 | 0.00087000  |
| C | -1.82089100 | -1.26771900 | 0.00527600  |
| C | -1.44870700 | 1.10711900  | -0.00453700 |
| C | -3.20137700 | -1.05642600 | 0.00434100  |
| H | -1.43361500 | -2.28457900 | 0.00949500  |
| C | -2.82672600 | 1.32475100  | -0.00549100 |
| H | -0.77687000 | 1.96204600  | -0.00805700 |
| C | -3.71019900 | 0.24272400  | -0.00105300 |
| H | -3.87754400 | -1.90770000 | 0.00782800  |
| H | -3.21150600 | 2.34156100  | -0.00971700 |
| H | -4.78376000 | 0.41182000  | -0.00180000 |
| C | 3.45726500  | 0.36665000  | -0.00162700 |
| C | 2.78012600  | -0.17010800 | 1.26846700  |
| C | 1.27002800  | 0.11503400  | 1.26837400  |
| C | 0.57908400  | -0.44236300 | 0.00193600  |
| C | 1.26997300  | 0.10407900  | -1.26930300 |
| C | 2.78006800  | -0.18105600 | -1.26700600 |
| H | 0.79944700  | -0.31282500 | 2.16252700  |
| H | 2.94287300  | -1.25638200 | 1.33321800  |
| H | 3.24371300  | 0.26714900  | 2.16218400  |
| H | 3.39725600  | 1.46536300  | -0.00636900 |
| H | 4.52500700  | 0.11246300  | -0.00055400 |
| H | 0.72869600  | -1.53283900 | 0.00663800  |
| H | 0.79934600  | -0.33148000 | -2.15970600 |
| H | 1.10622400  | 1.18963400  | -1.33136500 |
| H | 2.94281100  | -1.26785000 | -1.32238200 |
| H | 3.24361400  | 0.24846700  | -2.16448700 |

|   |            |            |            |
|---|------------|------------|------------|
| H | 1.10628900 | 1.20108400 | 1.32107500 |
|---|------------|------------|------------|

**CP1'**

|    |             |             |             |
|----|-------------|-------------|-------------|
| Ni | 0.00000100  | -0.00008100 | -0.00055500 |
| C  | 2.71043600  | -0.68529900 | -0.22799700 |
| C  | 1.37146500  | -2.45213300 | -0.94630500 |
| C  | 2.46710900  | -3.27227800 | -1.13207300 |
| C  | 3.77070900  | -2.79977000 | -0.84001900 |
| C  | 3.85216500  | -1.48886400 | -0.38147700 |
| C  | 2.71024600  | 0.68556400  | 0.22768200  |
| C  | 1.37070000  | 2.45219100  | 0.94545400  |
| C  | 2.46613900  | 3.27250600  | 1.13167600  |
| C  | 3.76993000  | 2.80020400  | 0.84012900  |
| C  | 3.85178400  | 1.48931800  | 0.38160500  |
| H  | 0.37159800  | -2.80656300 | -1.17699500 |
| H  | 2.30239500  | -4.27077600 | -1.51906200 |
| H  | 4.81687500  | -1.06724500 | -0.11813500 |
| H  | 0.37066800  | 2.80647400  | 1.17566600  |
| H  | 2.30111700  | 4.27097400  | 1.51860600  |
| H  | 4.81666400  | 1.06787100  | 0.11861100  |
| N  | 1.44964800  | 1.17538100  | 0.50106100  |
| N  | 1.45001900  | -1.17530900 | -0.50187800 |
| C  | 5.03534300  | -3.65891800 | -0.99891900 |
| C  | 5.03435200  | 3.65959200  | 0.99943900  |
| C  | 4.71622600  | -5.06486900 | -1.54265700 |
| H  | 5.64287700  | -5.64117100 | -1.64393400 |
| H  | 4.05340800  | -5.62132200 | -0.87012100 |
| H  | 4.24394500  | -5.02207500 | -2.53081200 |
| C  | 5.72722400  | -3.81775000 | 0.37639800  |
| H  | 6.63553400  | -4.42567700 | 0.27981500  |
| H  | 6.01658600  | -2.84988300 | 0.79949400  |
| H  | 5.06250500  | -4.31062500 | 1.09502200  |
| C  | 6.00959200  | -2.97002000 | -1.98442100 |
| H  | 6.92043800  | -3.56984800 | -2.10379600 |
| H  | 5.54899900  | -2.84999300 | -2.97161700 |
| H  | 6.30895300  | -1.97689500 | -1.63293200 |
| C  | 6.00855300  | 2.97078300  | 1.98504400  |
| H  | 6.30820900  | 1.97776600  | 1.63350300  |
| H  | 6.91924500  | 3.57079500  | 2.10466400  |
| H  | 5.54779800  | 2.85054100  | 2.97213900  |
| C  | 5.72647200  | 3.81874700  | -0.37572300 |
| H  | 6.63463200  | 4.42686100  | -0.27889600 |
| H  | 6.01611800  | 2.85098700  | -0.79887200 |
| H  | 5.06178300  | 4.31156000  | -1.09441800 |
| C  | 4.71482500  | 5.06540100  | 1.54330500  |
| H  | 4.05211100  | 5.62184900  | 0.87066600  |
| H  | 4.24225900  | 5.02236100  | 2.53131500  |
| H  | 5.64134500  | 5.64184900  | 1.64494500  |
| C  | -2.71026800 | -0.68566600 | 0.22761100  |
| C  | -1.37083600 | -2.45242600 | 0.94524200  |
| C  | -2.46634300 | -3.27264500 | 1.13153700  |
| C  | -3.77010700 | -2.80020500 | 0.84013300  |
| C  | -3.85187400 | -1.48930500 | 0.38162700  |
| C  | -2.71037700 | 0.68523000  | -0.22800500 |
| C  | -1.37128700 | 2.45202200  | -0.94621000 |
| C  | -2.46688800 | 3.27222200  | -1.13202200 |
| C  | -3.77051600 | 2.79976200  | -0.84004100 |
| C  | -3.85206000 | 1.48885100  | -0.38152000 |
| H  | -0.37083000 | -2.80680900 | 1.17539900  |
| H  | -2.30137700 | -4.27113600 | 1.51843200  |
| H  | -4.81674100 | -1.06775700 | 0.11875500  |
| H  | -0.37137900 | 2.80643100  | -1.17676900 |
| H  | -2.30211200 | 4.27072200  | -1.51897600 |



|   |             |             |             |
|---|-------------|-------------|-------------|
| H | -4.81680700 | 1.06728200  | -0.11823900 |
| N | -1.44992900 | 1.17520200  | -0.50181100 |
| N | -1.44970300 | -1.17561100 | 0.50087600  |
| C | -5.03461600 | -3.65944200 | 0.99961100  |
| C | -5.03510600 | 3.65898000  | -0.99895900 |
| C | -4.71510800 | -5.06550900 | 1.54281700  |
| H | -5.64169300 | -5.64181100 | 1.64469800  |
| H | -4.05282800 | -5.62184300 | 0.86965400  |
| H | -4.24205700 | -5.02292500 | 2.53061400  |
| C | -5.72732400 | -3.81797400 | -0.37532100 |
| H | -6.63558100 | -4.42591300 | -0.27832200 |
| H | -6.01692900 | -2.85001300 | -0.79803600 |
| H | -5.06304200 | -4.31070100 | -1.09445100 |
| C | -6.00828800 | -2.97081900 | 1.98587200  |
| H | -6.91900900 | -3.57074800 | 2.10571300  |
| H | -5.54707400 | -2.85095200 | 2.97279700  |
| H | -6.30796300 | -1.97765200 | 1.63477600  |
| C | -6.00935700 | 2.97016100  | -1.98451100 |
| H | -6.30877800 | 1.97703900  | -1.63306400 |
| H | -6.92017200 | 3.57003600  | -2.10389600 |
| H | -5.54874200 | 2.85014200  | -2.97169800 |
| C | -5.72701700 | 3.81781000  | 0.37634200  |
| H | -6.63528800 | 4.42579400  | 0.27975300  |
| H | -6.01645000 | 2.84994900  | 0.79940200  |
| H | -5.06228900 | 4.31062300  | 1.09500000  |
| C | -4.71589800 | 5.06493100  | -1.54264500 |
| H | -4.05305500 | 5.62132000  | -0.87008200 |
| H | -4.24361000 | 5.02214400  | -2.53079700 |
| H | -5.64251400 | 5.64128900  | -1.64391300 |

bipyridyl

|   |             |             |             |
|---|-------------|-------------|-------------|
| C | 0.73710500  | 1.23698300  | -0.12418900 |
| C | 2.58531200  | 2.37364400  | -0.83090100 |
| C | 3.42785500  | 1.28225100  | -0.59969800 |
| C | 2.89000900  | 0.09538200  | -0.09161500 |
| C | 1.50686600  | 0.09837300  | 0.14377100  |
| C | -0.73710100 | 1.23698500  | 0.12417500  |
| C | -2.58530500 | 2.37364900  | 0.83088400  |
| C | -3.42786200 | 1.28227800  | 0.59961800  |
| C | -2.89002000 | 0.09541200  | 0.09152700  |
| C | -1.50687400 | 0.09839800  | -0.14384900 |
| H | 2.99989000  | 3.30119500  | -1.22504100 |
| H | 4.48576900  | 1.37969700  | -0.81473100 |
| H | 1.02184600  | -0.77782100 | 0.56217900  |
| H | -2.99989000 | 3.30121400  | 1.22498400  |
| H | -4.48579700 | 1.37976600  | 0.81452800  |
| H | -1.02185300 | -0.77779700 | -0.56225600 |
| N | -1.27254200 | 2.37364600  | 0.60499500  |
| N | 1.27255200  | 2.37365000  | -0.60499000 |
| C | 3.73136600  | -1.15394700 | 0.21584700  |
| C | -3.73137100 | -1.15393700 | -0.21586500 |
| C | 5.21967300  | -0.95060200 | -0.12526100 |
| H | 5.77881700  | -1.86442300 | 0.10489100  |
| H | 5.36808300  | -0.73126200 | -1.18879000 |
| H | 5.66405700  | -0.13617200 | 0.45800400  |
| C | 3.20057700  | -2.34607700 | -0.61557300 |
| H | 3.78804200  | -3.24744500 | -0.40320400 |
| H | 2.15342200  | -2.56949200 | -0.38573300 |
| H | 3.27172200  | -2.13926400 | -1.68952900 |
| C | 3.61787300  | -1.48711900 | 1.72269300  |
| H | 4.20849500  | -2.38068600 | 1.95840400  |
| H | 3.99188400  | -0.66028000 | 2.33698000  |
| H | 2.58246800  | -1.68296600 | 2.02036600  |

|   |             |             |             |
|---|-------------|-------------|-------------|
| C | -3.61777000 | -1.48750700 | -1.72260500 |
| H | -2.58237700 | -1.68354400 | -2.02018700 |
| H | -4.20844200 | -2.38108800 | -1.95813400 |
| H | -3.99166900 | -0.66081000 | -2.33715200 |
| C | -3.20063600 | -2.34585100 | 0.61592100  |
| H | -3.78804700 | -3.24729500 | 0.40372000  |
| H | -2.15344200 | -2.56923100 | 0.38622400  |
| H | -3.27189500 | -2.13875100 | 1.68981300  |
| C | -5.21970800 | -0.95050300 | 0.12504500  |
| H | -5.36828800 | -0.73133100 | 1.18858200  |
| H | -5.66389400 | -0.13591800 | -0.45816200 |
| H | -5.77890400 | -1.86423400 | -0.10533900 |

TS1'

|    |             |             |             |
|----|-------------|-------------|-------------|
| Ni | -0.07318900 | -0.09988900 | -1.41747900 |
| I  | -0.39362000 | 2.61025000  | -0.51003300 |
| C  | -3.09355400 | 5.97590400  | 2.49849200  |
| C  | -1.56111100 | 6.03404800  | 2.59646400  |
| C  | -0.90667400 | 4.80573600  | 1.91601400  |
| C  | -1.39864200 | 4.68394800  | 0.49229600  |
| C  | -2.90190100 | 4.60010300  | 0.36310000  |
| C  | -3.55927800 | 5.82767700  | 1.04161200  |
| H  | 0.18536000  | 4.88752400  | 1.94892900  |
| H  | -1.19946200 | 6.95225700  | 2.11159000  |
| H  | -1.24440400 | 6.08721600  | 3.64693700  |
| H  | -3.45995100 | 5.11887800  | 3.08318100  |
| H  | -3.53679500 | 6.87374100  | 2.94878100  |
| H  | -0.94040800 | 5.39992100  | -0.19198200 |
| H  | -3.20306600 | 4.53862700  | -0.68863300 |
| H  | -3.26471200 | 3.68724400  | 0.85634300  |
| H  | -3.29572300 | 6.73577800  | 0.48049500  |
| H  | -4.65279600 | 5.73500400  | 0.99460600  |
| H  | -1.17848400 | 3.90217300  | 2.47952300  |
| C  | -5.17220900 | -5.29622600 | -0.51377000 |
| C  | -4.02182900 | -4.85063800 | -1.12630800 |
| C  | -3.80011300 | -3.46168600 | -1.34254800 |
| C  | -4.80237000 | -2.53169400 | -0.90936000 |
| C  | -5.97551100 | -3.02266500 | -0.28136600 |
| C  | -6.16014900 | -4.37505900 | -0.08595800 |
| H  | -1.87524800 | -3.68459200 | -2.29337100 |
| H  | -5.32698300 | -6.36055700 | -0.35668500 |
| H  | -3.26378200 | -5.55792000 | -1.45537600 |
| C  | -2.62905000 | -2.96946200 | -1.96857400 |
| C  | -4.57235200 | -1.14511300 | -1.13166100 |
| H  | -6.73147200 | -2.31112800 | 0.04376100  |
| H  | -7.06392200 | -4.73920600 | 0.39509400  |
| C  | -3.42832300 | -0.69844200 | -1.74623600 |
| C  | -2.41652800 | -1.61195900 | -2.18522900 |
| H  | -5.32709000 | -0.43187900 | -0.80736900 |
| H  | -3.28673400 | 0.36745100  | -1.89684000 |
| C  | -1.17728500 | -1.15808000 | -2.83454500 |
| H  | -0.52438400 | -1.96164700 | -3.17301500 |
| C  | -0.89762800 | 0.14989900  | -3.26863800 |
| H  | -1.64942800 | 0.93340100  | -3.23873800 |
| H  | -0.10678900 | 0.30396900  | -3.99869100 |
| C  | 1.59853800  | -1.14041100 | 0.63703100  |
| C  | -0.63541700 | -1.38142100 | 1.23827500  |
| C  | -0.30134000 | -1.95056400 | 2.45742800  |
| C  | 1.05424800  | -2.12915600 | 2.80109700  |
| C  | 1.99190800  | -1.70780300 | 1.85674300  |
| C  | 2.52352100  | -0.66280200 | -0.39309400 |
| C  | 2.71138500  | 0.37185400  | -2.46697100 |
| C  | 4.09490100  | 0.31656200  | -2.43088800 |

|   |             |             |             |
|---|-------------|-------------|-------------|
| C | 4.74641200  | -0.25365100 | -1.31618200 |
| C | 3.92050100  | -0.74023400 | -0.30259600 |
| H | -1.67461500 | -1.24052900 | 0.95572000  |
| H | -1.09988500 | -2.25207300 | 3.12372100  |
| H | 3.04980100  | -1.81511500 | 2.06803800  |
| H | 2.19405900  | 0.82155900  | -3.30905600 |
| H | 4.65191500  | 0.72361800  | -3.26559300 |
| H | 4.36332900  | -1.19129200 | 0.57820500  |
| N | 1.92278300  | -0.09867200 | -1.48546400 |
| N | 0.27533500  | -0.97899900 | 0.33582100  |
| C | 1.51094400  | -2.74752700 | 4.13218700  |
| C | 6.27542800  | -0.34870800 | -1.19189500 |
| C | 0.32019800  | -3.14175900 | 5.02680300  |
| H | 0.69054500  | -3.57618000 | 5.96200400  |
| H | -0.29835600 | -2.27555900 | 5.28764900  |
| H | -0.32111300 | -3.88968200 | 4.54681700  |
| C | 2.37868300  | -1.72344500 | 4.90262000  |
| H | 2.71383400  | -2.15157800 | 5.85511900  |
| H | 3.27000700  | -1.43438400 | 4.33569200  |
| H | 1.81071200  | -0.81192100 | 5.11998000  |
| C | 2.34620900  | -4.01902200 | 3.84796500  |
| H | 2.68219900  | -4.47011800 | 4.78945900  |
| H | 1.75434900  | -4.76512500 | 3.30569600  |
| H | 3.23608500  | -3.79794500 | 3.24895400  |
| C | 6.73743500  | 0.42565400  | 0.06597900  |
| H | 6.29354100  | 0.01982000  | 0.98122800  |
| H | 7.82768300  | 0.36526200  | 0.16912800  |
| H | 6.45943300  | 1.48351500  | 0.00030500  |
| C | 6.68900900  | -1.83442500 | -1.06180800 |
| H | 7.77852500  | -1.91792400 | -0.96793700 |
| H | 6.24215400  | -2.30729600 | -0.18073900 |
| H | 6.37885000  | -2.40764300 | -1.94290000 |
| C | 6.99450900  | 0.24733700  | -2.41721700 |
| H | 6.72943600  | -0.27822200 | -3.34174100 |
| H | 6.76394200  | 1.31065800  | -2.54819100 |
| H | 8.07876300  | 0.15862100  | -2.28696200 |

### CP2'

|    |             |             |             |
|----|-------------|-------------|-------------|
| Ni | 0.08248200  | -1.69214000 | -0.02671100 |
| I  | -0.09511800 | -3.06005100 | 2.20845900  |
| C  | -0.99022600 | 0.98781300  | 0.35300700  |
| C  | 1.12046500  | 0.84513500  | 1.28450900  |
| C  | 1.07318300  | 2.16784400  | 1.71783200  |
| C  | -0.06147900 | 2.94689600  | 1.46169300  |
| C  | -1.10162300 | 2.31740200  | 0.76209300  |
| C  | -2.05455400 | 0.25449500  | -0.37782400 |
| C  | -2.66480800 | -1.75566200 | -1.34362200 |
| C  | -3.92386200 | -1.27105000 | -1.68670200 |
| C  | -4.27433200 | 0.04553000  | -1.36208600 |
| C  | -3.30012100 | 0.80046000  | -0.69337500 |
| H  | 1.98755400  | 0.22193000  | 1.47912800  |
| H  | 1.92620100  | 2.56724400  | 2.25211600  |
| H  | -2.00550500 | 2.87081900  | 0.53660100  |
| H  | -2.37907000 | -2.77779200 | -1.57284600 |
| H  | -4.61359300 | -1.93242300 | -2.19614200 |
| H  | -3.51949300 | 1.82203200  | -0.40710700 |
| N  | -1.74456600 | -1.02078300 | -0.71165100 |
| N  | 0.12107300  | 0.26216600  | 0.61508800  |
| C  | -0.19958300 | 4.41081400  | 1.90700100  |
| C  | -5.64181600 | 0.66150600  | -1.69481200 |
| C  | 1.04999900  | 4.90784400  | 2.65823200  |
| H  | 0.90782200  | 5.95265300  | 2.95489200  |
| H  | 1.23536400  | 4.32895000  | 3.56994600  |

|   |             |             |             |
|---|-------------|-------------|-------------|
| H | 1.94836200  | 4.86232000  | 2.03228700  |
| C | -1.42055100 | 4.54351500  | 2.84891300  |
| H | -1.53197100 | 5.58429000  | 3.17485000  |
| H | -2.35315000 | 4.24824400  | 2.35629000  |
| H | -1.30010500 | 3.91855500  | 3.74068000  |
| C | -0.40789100 | 5.30498100  | 0.66095100  |
| H | -0.51163000 | 6.35340700  | 0.96401900  |
| H | 0.44464600  | 5.23200200  | -0.02365300 |
| H | -1.31026200 | 5.02982100  | 0.10436500  |
| C | -6.33730600 | 1.09521500  | -0.38177400 |
| H | -5.75223400 | 1.84163000  | 0.16584600  |
| H | -7.31544500 | 1.53733900  | -0.60416500 |
| H | -6.49415900 | 0.23860700  | 0.28299000  |
| C | -5.43614500 | 1.89701900  | -2.60410300 |
| H | -6.40456100 | 2.34965300  | -2.84679300 |
| H | -4.82281700 | 2.66499500  | -2.12084600 |
| H | -4.94674900 | 1.61835400  | -3.54421000 |
| C | -6.56251600 | -0.33314200 | -2.42689700 |
| H | -6.13437300 | -0.66087600 | -3.38109400 |
| H | -6.77062300 | -1.22080000 | -1.81901200 |
| H | -7.52190800 | 0.14812200  | -2.64504600 |
| C | 5.84809100  | 2.24488100  | -2.45840600 |
| C | 4.62230000  | 1.66702000  | -2.70487500 |
| C | 4.20338800  | 0.51076700  | -1.99016300 |
| C | 5.08437800  | -0.04545600 | -1.00556500 |
| C | 6.34025200  | 0.57386500  | -0.77463800 |
| C | 6.71667000  | 1.69433100  | -1.48360600 |
| H | 2.28828600  | 0.32015200  | -2.96972900 |
| H | 6.15513300  | 3.12721800  | -3.01388900 |
| H | 3.95581900  | 2.08802300  | -3.45448000 |
| C | 2.94888500  | -0.10868300 | -2.21794000 |
| C | 4.65724100  | -1.20268700 | -0.29718200 |
| H | 7.00444200  | 0.14626800  | -0.02683900 |
| H | 7.68181200  | 2.15837700  | -1.29920400 |
| C | 3.43692700  | -1.78348900 | -0.54469600 |
| C | 2.54606600  | -1.24172000 | -1.52446900 |
| H | 5.31851700  | -1.63101400 | 0.45273400  |
| H | 3.14032200  | -2.66174200 | 0.02054900  |
| C | 1.22710800  | -1.83930900 | -1.79843600 |
| H | 0.65049600  | -1.33133100 | -2.57019000 |
| C | 0.79479200  | -3.09627100 | -1.37183000 |
| H | 1.44343800  | -3.77879900 | -0.83253500 |
| H | -0.06192800 | -3.56246200 | -1.85139800 |

### TS3'

|   |            |             |             |
|---|------------|-------------|-------------|
| C | 2.21148600 | 5.51526300  | -1.80289900 |
| C | 1.62942600 | 4.26638900  | -1.85190300 |
| C | 2.23139800 | 3.15177300  | -1.20130800 |
| C | 3.46375000 | 3.35514700  | -0.49317600 |
| C | 4.03416500 | 4.64871900  | -0.46083600 |
| C | 3.42441600 | 5.71158000  | -1.10078200 |
| H | 0.73283000 | 1.71256300  | -1.77855900 |
| H | 1.74087700 | 6.35522100  | -2.30762000 |
| H | 0.69895900 | 4.11295200  | -2.39462200 |
| C | 1.66142700 | 1.85977700  | -1.23038200 |
| C | 4.06270200 | 2.23211000  | 0.15665000  |
| H | 4.96669000 | 4.79579500  | 0.07946900  |
| H | 3.87517500 | 6.69967400  | -1.06791500 |
| C | 3.49408300 | 0.98945400  | 0.11214200  |
| C | 2.25831300 | 0.75354700  | -0.59325600 |
| H | 4.99006600 | 2.38434600  | 0.70422800  |
| H | 3.96329900 | 0.16616200  | 0.63944800  |
| C | 1.65168500 | -0.53339300 | -0.66525300 |

|    |             |             |             |
|----|-------------|-------------|-------------|
| H  | 0.73243100  | -0.58722800 | -1.24569400 |
| C  | 2.35924200  | -1.83291800 | -0.39838100 |
| H  | 2.93263400  | -1.77621100 | 0.53336000  |
| H  | 1.61260900  | -2.62320400 | -0.24172400 |
| C  | 4.29664300  | -4.25678900 | -3.56210200 |
| C  | 3.52472000  | -2.99771800 | -3.98433800 |
| C  | 2.57673800  | -2.51536800 | -2.87435000 |
| C  | 3.31266300  | -2.28281400 | -1.54160700 |
| C  | 4.08781500  | -3.54935500 | -1.13135000 |
| C  | 5.04015200  | -4.03253800 | -2.23670300 |
| H  | 2.06947600  | -1.59506900 | -3.19039200 |
| H  | 4.24148600  | -2.19658600 | -4.21828300 |
| H  | 2.95968900  | -3.18783700 | -4.90646000 |
| H  | 3.58920000  | -5.09132800 | -3.44265100 |
| H  | 5.00091300  | -4.55477800 | -4.34974900 |
| H  | 4.04424200  | -1.47466700 | -1.69916100 |
| H  | 4.64636400  | -3.36051200 | -0.20519000 |
| H  | 3.36643800  | -4.34868900 | -0.89990800 |
| H  | 5.82905600  | -3.28085400 | -2.38822200 |
| H  | 5.54576700  | -4.95469000 | -1.92185200 |
| H  | 1.78899300  | -3.26999900 | -2.71751100 |
| Ni | 0.05821700  | -0.44634300 | 1.56942400  |
| I  | 1.63563900  | -1.01569400 | 3.47033900  |
| C  | -2.43269900 | -0.77452900 | 0.21527200  |
| C  | -1.55630000 | -2.84588300 | 0.76585700  |
| C  | -2.65114800 | -3.50892400 | 0.21912500  |
| C  | -3.69645700 | -2.77623400 | -0.35948500 |
| C  | -3.55751400 | -1.38028000 | -0.34479400 |
| C  | -2.21617100 | 0.69072100  | 0.28082600  |
| C  | -0.78926900 | 2.36558100  | 1.00248900  |
| C  | -1.63444200 | 3.36020700  | 0.51790300  |
| C  | -2.83249200 | 3.01292200  | -0.11952300 |
| C  | -3.10279600 | 1.63986600  | -0.22681600 |
| H  | -0.74186600 | -3.39180000 | 1.23264100  |
| H  | -2.67298100 | -4.59097000 | 0.25888100  |
| H  | -4.33702500 | -0.75978800 | -0.77141600 |
| H  | 0.14411500  | 2.61499600  | 1.49600500  |
| H  | -1.33762500 | 4.39383300  | 0.64389200  |
| H  | -4.01463100 | 1.30922900  | -0.71053600 |
| N  | -1.06204400 | 1.05805900  | 0.89413800  |
| N  | -1.43504300 | -1.51146600 | 0.76649100  |
| C  | -4.94231000 | -3.42699700 | -0.97950300 |
| C  | -3.81956800 | 4.04615000  | -0.68343100 |
| C  | -4.89570000 | -4.96439500 | -0.89483500 |
| H  | -5.79972900 | -5.38419600 | -1.34893300 |
| H  | -4.03488900 | -5.37753700 | -1.43276200 |
| H  | -4.85500100 | -5.31563400 | 0.14237500  |
| C  | -5.04021900 | -3.02308700 | -2.47050100 |
| H  | -5.92810900 | -3.47751600 | -2.92533700 |
| H  | -5.12093000 | -1.93820300 | -2.59750500 |
| H  | -4.16099700 | -3.36231600 | -3.02970700 |
| C  | -6.20228800 | -2.93457500 | -0.22724600 |
| H  | -7.10045000 | -3.38964300 | -0.66082300 |
| H  | -6.16054100 | -3.20812900 | 0.83292400  |
| H  | -6.31833100 | -1.84723900 | -0.28886900 |
| C  | -3.98632000 | 3.81490900  | -2.20476800 |
| H  | -4.37203700 | 2.81445500  | -2.42840000 |
| H  | -4.69188000 | 4.54349700  | -2.62083600 |
| H  | -3.03058700 | 3.93114500  | -2.72826300 |
| C  | -5.18949500 | 3.87843500  | 0.01720400  |
| H  | -5.90545600 | 4.60888200  | -0.37735600 |
| H  | -5.61216600 | 2.88046400  | -0.14115200 |
| H  | -5.10163100 | 4.03808700  | 1.09763800  |
| C  | -3.33399700 | 5.49119900  | -0.46208300 |

|   |             |            |             |
|---|-------------|------------|-------------|
| H | -3.22371400 | 5.72640800 | 0.60246100  |
| H | -2.37492600 | 5.68065600 | -0.95723500 |
| H | -4.06498000 | 6.19177400 | -0.88004300 |

### CP6'

|    |             |             |             |
|----|-------------|-------------|-------------|
| Ni | -0.34560700 | -1.02549300 | -0.40712400 |
| I  | -1.30414600 | -3.42849200 | -0.66141400 |
| C  | -0.06932800 | 2.40113900  | 5.29079900  |
| C  | -0.37024700 | 1.37831800  | 4.41967800  |
| C  | -0.96793400 | 1.64563700  | 3.15529400  |
| C  | -1.25591600 | 3.00714300  | 2.80837300  |
| C  | -0.93582900 | 4.03887100  | 3.72993300  |
| C  | -0.35410500 | 3.74631500  | 4.94402300  |
| H  | -1.08014100 | -0.41283700 | 2.52206800  |
| H  | 0.38592200  | 2.18017100  | 6.25282800  |
| H  | -0.15653600 | 0.34579300  | 4.68721700  |
| C  | -1.29063900 | 0.61697300  | 2.23748700  |
| C  | -1.86803600 | 3.25814500  | 1.55238300  |
| H  | -1.16126600 | 5.06885000  | 3.46112500  |
| H  | -0.11464100 | 4.54429700  | 5.64189300  |
| C  | -2.16094100 | 2.23267700  | 0.68227100  |
| C  | -1.86524500 | 0.86789200  | 0.99286600  |
| H  | -2.11857700 | 4.28399200  | 1.28871400  |
| H  | -2.65716000 | 2.46813100  | -0.25452500 |
| C  | -2.12812600 | -0.27161600 | 0.06092900  |
| H  | -2.43703300 | -1.12747500 | 0.66432800  |
| C  | -3.13816500 | -0.07519400 | -1.07197900 |
| H  | -2.84322500 | 0.75298200  | -1.73533400 |
| H  | -3.11816300 | -0.97356700 | -1.70019500 |
| C  | -7.54168000 | -0.40964100 | -0.74801800 |
| C  | -6.69310200 | -0.78730300 | 0.47494400  |
| C  | -5.22333600 | -1.02923800 | 0.09427300  |
| C  | -4.60578600 | 0.17846000  | -0.63755600 |
| C  | -5.47132500 | 0.55395100  | -1.85716400 |
| C  | -6.94212000 | 0.79777200  | -1.48406800 |
| H  | -4.64344700 | -1.26576000 | 0.99398500  |
| H  | -6.74697400 | 0.02514200  | 1.21544100  |
| H  | -7.10560400 | -1.68006800 | 0.96286700  |
| H  | -7.58471200 | -1.26690700 | -1.43639500 |
| H  | -8.57618600 | -0.19765700 | -0.44690900 |
| H  | -4.62298000 | 1.03248300  | 0.05795200  |
| H  | -5.05648600 | 1.44563500  | -2.34911500 |
| H  | -5.41530300 | -0.26057500 | -2.59599100 |
| H  | -7.00822400 | 1.68429200  | -0.83529500 |
| H  | -7.52787800 | 1.02646300  | -2.38448300 |
| H  | -5.15448900 | -1.91314000 | -0.55733300 |
| C  | 2.49488300  | -0.62019400 | -0.34783900 |
| C  | 2.03841300  | -2.76469700 | 0.37300500  |
| C  | 3.36583100  | -2.96653300 | 0.74657200  |
| C  | 4.31002400  | -1.94824300 | 0.57702100  |
| C  | 3.83442600  | -0.75524000 | 0.01195200  |
| C  | 1.92074100  | 0.59163900  | -0.96431400 |
| C  | -0.01452900 | 1.63970200  | -1.65349200 |
| C  | 0.69976200  | 2.69359100  | -2.21614900 |
| C  | 2.09578000  | 2.71754300  | -2.14117200 |
| C  | 2.69082800  | 1.62186800  | -1.49973100 |
| H  | 1.29077900  | -3.54215000 | 0.48892900  |
| H  | 3.63765800  | -3.92557700 | 1.16998400  |
| H  | 4.50943300  | 0.07989900  | -0.13383300 |
| H  | -1.09249800 | 1.61769700  | -1.70687100 |
| H  | 0.14421500  | 3.48411800  | -2.70515700 |
| H  | 3.77037800  | 1.55562500  | -1.43634900 |
| N  | 0.56208400  | 0.60703800  | -1.02420500 |

|   |            |             |             |   |             |             |             |
|---|------------|-------------|-------------|---|-------------|-------------|-------------|
| N | 1.59826400 | -1.61831100 | -0.16157300 | H | -8.67743900 | 0.98999700  | 1.09553300  |
| C | 5.78617100 | -2.08556800 | 0.97726400  | H | -4.69266900 | -0.18260400 | 1.47568100  |
| C | 2.95892100 | 3.84418000  | -2.72567900 | H | -4.73778100 | 2.06746800  | 2.52083600  |
| C | 6.09862600 | -3.47254800 | 1.56998000  | H | -5.30204200 | 2.77821800  | 1.01100200  |
| H | 7.15922900 | -3.52574800 | 1.83827000  | H | -6.82083100 | 0.73144400  | 2.71973800  |
| H | 5.51892400 | -3.66847200 | 2.47898400  | H | -7.21723800 | 2.43883000  | 2.55180600  |
| H | 5.89908600 | -4.27759100 | 0.85381500  | H | -5.55194500 | 1.21949000  | -1.10090900 |
| C | 6.12677500 | -1.01137900 | 2.03843100  | C | 2.21580700  | 0.21732000  | 0.30173400  |
| H | 7.17947200 | -1.09562700 | 2.33235300  | C | 1.96042200  | -2.01412600 | -0.23842500 |
| H | 5.96752300 | 0.00436200  | 1.66099800  | C | 3.30460600  | -2.27555500 | 0.00491000  |
| H | 5.51215000 | -1.13572300 | 2.93693600  | C | 4.15593500  | -1.24938400 | 0.43153200  |
| C | 6.67405300 | -1.87693800 | -0.27331800 | C | 3.57050100  | 0.01538700  | 0.56875000  |
| H | 7.73190000 | -1.97062200 | -0.00179800 | C | 1.55552300  | 1.53413700  | 0.33862500  |
| H | 6.45347200 | -2.62470200 | -1.04328300 | C | -0.40447100 | 2.68826000  | -0.04976800 |
| H | 6.53216000 | -0.88559000 | -0.71687900 | C | 0.21707000  | 3.91417500  | 0.16112100  |
| C | 3.79504800 | 4.48258600  | -1.59022800 | C | 1.57669300  | 3.96663900  | 0.49022900  |
| H | 4.45930000 | 3.75527300  | -1.11131400 | C | 2.23429400  | 2.73266600  | 0.56234700  |
| H | 4.41972700 | 5.28843600  | -1.99262000 | H | 1.29931800  | -2.80177500 | -0.57297200 |
| H | 3.14833700 | 4.90815400  | -0.81489500 | H | 3.66371000  | -3.28587700 | -0.14614000 |
| C | 3.90699300 | 3.25609500  | -3.79869400 | H | 4.17799200  | 0.85611400  | 0.88131300  |
| H | 4.53133700 | 4.05103300  | -4.22276000 | H | -1.44770000 | 2.64392900  | -0.32518200 |
| H | 4.57603900 | 2.49480000  | -3.38353300 | H | -0.37679100 | 4.81381000  | 0.05666200  |
| H | 3.34085400 | 2.79611300  | -4.61629400 | H | 3.29599600  | 2.70363600  | 0.77535300  |
| C | 2.10476300 | 4.94591300  | -3.38082600 | N | 0.22537500  | 1.51016500  | 0.05785000  |
| H | 1.50995800 | 4.55972500  | -4.21630500 | N | 1.40794600  | -0.80419700 | -0.08040100 |
| H | 1.42508600 | 5.41729400  | -2.66194900 | C | 5.64868800  | -1.45460200 | 0.72814300  |
| H | 2.75901100 | 5.72938800  | -3.77792400 | C | 2.34023700  | 5.27524600  | 0.73926300  |

### CP7'

|    |             |             |             |
|----|-------------|-------------|-------------|
| Ni | -0.48554500 | -0.29795600 | -0.37603600 |
| I  | -0.25250900 | -0.18063200 | -3.18781600 |
| C  | -0.05361200 | -5.73029200 | 0.16208200  |
| C  | -0.54963000 | -4.59168800 | -0.45081400 |
| C  | -1.01596700 | -3.49958200 | 0.31881100  |
| C  | -0.99118300 | -3.59644000 | 1.74303300  |
| C  | -0.47722900 | -4.76804400 | 2.34279700  |
| C  | -0.01274100 | -5.81736300 | 1.56824900  |
| H  | -1.71253900 | -2.32232900 | -1.36902700 |
| H  | 0.29907100  | -6.56185800 | -0.44200800 |
| H  | -0.58800200 | -4.52143600 | -1.53543000 |
| C  | -1.54031300 | -2.31155300 | -0.29728200 |
| C  | -1.51807100 | -2.50750100 | 2.51707100  |
| H  | -0.45777600 | -4.83770700 | 3.42818100  |
| H  | 0.37659500  | -6.71358500 | 2.04373200  |
| C  | -2.04277800 | -1.39565100 | 1.92538000  |
| C  | -2.10882400 | -1.27584900 | 0.48481200  |
| H  | -1.49850600 | -2.58965000 | 3.60160900  |
| H  | -2.44214800 | -0.59305900 | 2.53732800  |
| C  | -2.49551000 | -0.08924700 | -0.23331200 |
| H  | -2.79601700 | -0.26437100 | -1.26413600 |
| C  | -3.24280700 | 1.04111000  | 0.44068200  |
| H  | -2.71653900 | 1.37842100  | 1.34465400  |
| H  | -3.27791100 | 1.90297100  | -0.23996800 |
| C  | -7.65322900 | 1.23827900  | 0.78843200  |
| C  | -7.03902400 | 0.08068800  | -0.01229200 |
| C  | -5.57998800 | 0.36929400  | -0.40131600 |
| C  | -4.70855600 | 0.70534500  | 0.82401600  |
| C  | -5.33803400 | 1.86324500  | 1.62305400  |
| C  | -6.79588000 | 1.57762100  | 2.01691700  |
| H  | -5.16222600 | -0.48924500 | -0.93995400 |
| H  | -7.07626000 | -0.83706600 | 0.59349300  |
| H  | -7.63394000 | -0.11767300 | -0.91297100 |
| H  | -7.72648900 | 2.12613100  | 0.14262600  |

|   |             |             |             |
|---|-------------|-------------|-------------|
| H | -8.67743900 | 0.98999700  | 1.09553300  |
| H | -4.69266900 | -0.18260400 | 1.47568100  |
| H | -4.73778100 | 2.06746800  | 2.52083600  |
| H | -5.30204200 | 2.77821800  | 1.01100200  |
| H | -6.82083100 | 0.73144400  | 2.71973800  |
| H | -7.21723800 | 2.43883000  | 2.55180600  |
| H | -5.55194500 | 1.21949000  | -1.10090900 |
| C | 2.21580700  | 0.21732000  | 0.30173400  |
| C | 1.96042200  | -2.01412600 | -0.23842500 |
| C | 3.30460600  | -2.27555500 | 0.00491000  |
| C | 4.15593500  | -1.24938400 | 0.43153200  |
| C | 3.57050100  | 0.01538700  | 0.56875000  |
| C | 1.55552300  | 1.53413700  | 0.33862500  |
| C | -0.40447100 | 2.68826000  | -0.04976800 |
| C | 0.21707000  | 3.91417500  | 0.16112100  |
| C | 1.57669300  | 3.96663900  | 0.49022900  |
| C | 2.23429400  | 2.73266600  | 0.56234700  |
| H | 1.29931800  | -2.80177500 | -0.57297200 |
| H | 3.66371000  | -3.28587700 | -0.14614000 |
| H | 4.17799200  | 0.85611400  | 0.88131300  |
| H | -1.44770000 | 2.64392900  | -0.32518200 |
| H | -0.37679100 | 4.81381000  | 0.05666200  |
| H | 3.29599600  | 2.70363600  | 0.77535300  |
| N | 0.22537500  | 1.51016500  | 0.05785000  |
| N | 1.40794600  | -0.80419700 | -0.08040100 |
| C | 5.64868800  | -1.45460200 | 0.72814300  |
| C | 2.34023700  | 5.27524600  | 0.73926300  |
| C | 6.08427100  | -2.91698000 | 0.51700500  |
| H | 7.15136800  | -3.01812200 | 0.74280800  |
| H | 5.54103400  | -3.60415000 | 1.17565600  |
| H | 5.93461500  | -3.24182900 | -0.51871500 |
| C | 5.93400000  | -1.06691000 | 2.19901100  |
| H | 6.99826200  | -1.20319100 | 2.42410200  |
| H | 5.68283700  | -0.02059900 | 2.40353400  |
| H | 5.35772800  | -1.69192700 | 2.89055800  |
| C | 6.48340700  | -0.55512200 | -0.21525200 |
| H | 7.55276800  | -0.69225200 | -0.01609800 |
| H | 6.29722600  | -0.80570500 | -1.26536600 |
| H | 6.25349700  | 0.50695200  | -0.07875500 |
| C | 2.94036100  | 5.25129300  | 2.16563700  |
| H | 3.63415100  | 4.41520800  | 2.30452200  |
| H | 3.49447300  | 6.17785800  | 2.35600000  |
| H | 2.15361600  | 5.16434200  | 2.92361900  |
| C | 3.48049900  | 5.40522100  | -0.29945000 |
| H | 4.03374900  | 6.33730000  | -0.13467900 |
| H | 4.19491200  | 4.57803400  | -0.23007800 |
| H | 3.08369800  | 5.41993000  | -1.32043900 |
| C | 1.42699000  | 6.50958800  | 0.61610800  |
| H | 0.99724500  | 6.60095600  | -0.38769300 |
| H | 0.60601300  | 6.48444200  | 1.34183600  |
| H | 2.00916100  | 7.41729200  | 0.80840200  |

### TS4'-t

|   |             |            |             |
|---|-------------|------------|-------------|
| C | -1.27449300 | 5.52483200 | -1.95055100 |
| C | -1.02259700 | 4.17069000 | -2.02270900 |
| C | 0.09515900  | 3.59538100 | -1.35259100 |
| C | 0.96332000  | 4.46123300 | -0.60497200 |
| C | 0.67617200  | 5.84485200 | -0.54883600 |
| C | -0.42056300 | 6.37231100 | -1.20482200 |
| H | -0.28602400 | 1.56547800 | -1.97067000 |
| H | -2.12770200 | 5.94815900 | -2.47479800 |
| H | -1.67166100 | 3.52024600 | -2.60559900 |
| C | 0.37720700  | 2.21293100 | -1.39963400 |

|    |             |             |             |
|----|-------------|-------------|-------------|
| C  | 2.08777200  | 3.87928000  | 0.05810800  |
| H  | 1.33777300  | 6.49336700  | 0.02134500  |
| H  | -0.62684400 | 7.43788800  | -1.15435700 |
| C  | 2.34680300  | 2.53817200  | -0.00981200 |
| C  | 1.48990100  | 1.64176500  | -0.74817700 |
| H  | 2.74467200  | 4.52959600  | 0.63161600  |
| H  | 3.19982600  | 2.13052800  | 0.52203600  |
| C  | 1.73583900  | 0.24550100  | -0.83275600 |
| H  | 1.01325700  | -0.32932300 | -1.40920800 |
| C  | 3.02970000  | -0.43501000 | -0.49035900 |
| H  | 3.43445000  | -0.04990000 | 0.45216300  |
| H  | 2.83922900  | -1.50247600 | -0.31539200 |
| C  | 6.11815500  | -1.45327500 | -3.50081200 |
| C  | 4.80111200  | -0.83516800 | -3.99336400 |
| C  | 3.69655900  | -0.93287500 | -2.92868100 |
| C  | 4.12436200  | -0.30788100 | -1.58768800 |
| C  | 5.44866600  | -0.93030100 | -1.10651400 |
| C  | 6.55735500  | -0.83151900 | -2.16639900 |
| H  | 2.78116700  | -0.45018600 | -3.29380400 |
| H  | 4.96968800  | 0.22352700  | -4.24064100 |
| H  | 4.47451500  | -1.32257700 | -4.92157200 |
| H  | 5.98075800  | -2.53689000 | -3.36646300 |
| H  | 6.90420700  | -1.32961300 | -4.25717900 |
| H  | 4.29758800  | 0.76642500  | -1.75927700 |
| H  | 5.77046000  | -0.44737300 | -0.17454600 |
| H  | 5.27515200  | -1.98968000 | -0.86114300 |
| H  | 6.81029200  | 0.22701200  | -2.32771000 |
| H  | 7.47165500  | -1.31744300 | -1.80162100 |
| H  | 3.44720800  | -1.99333600 | -2.76189900 |
| Ni | 0.33211400  | -0.66542300 | 1.74042500  |
| I  | 2.13146800  | -0.48729600 | 3.49552000  |
| C  | -1.79133600 | -1.78604300 | 0.21248000  |
| C  | -0.14746100 | -3.37828700 | 0.56411400  |
| C  | -0.87864200 | -4.35303200 | -0.10913900 |
| C  | -2.13284400 | -4.03898800 | -0.64885600 |
| C  | -2.57361400 | -2.71915400 | -0.46690100 |
| C  | -2.18454100 | -0.37489400 | 0.44630400  |
| C  | -1.54940100 | 1.62831400  | 1.41641600  |
| C  | -2.70835700 | 2.26313000  | 0.97749500  |
| C  | -3.65779400 | 1.55189400  | 0.23429000  |
| C  | -3.36422100 | 0.20270100  | -0.02091800 |
| H  | 0.82130100  | -3.60264800 | 1.00040400  |
| H  | -0.45716200 | -5.34670900 | -0.19724900 |
| H  | -3.53919400 | -2.41787300 | -0.85609700 |
| H  | -0.79710000 | 2.16309900  | 1.98720400  |
| H  | -2.84317600 | 3.31063900  | 1.21448300  |
| H  | -4.06100200 | -0.39917200 | -0.59283100 |
| N  | -1.28371500 | 0.34099200  | 1.16383800  |
| N  | -0.57976400 | -2.12060200 | 0.72530000  |
| C  | -3.00818900 | -5.05435200 | -1.39882500 |
| C  | -4.95773300 | 2.17927000  | -0.29134300 |
| C  | -2.33939200 | -6.43893500 | -1.49151700 |
| H  | -2.99617400 | -7.12761700 | -2.03373400 |
| H  | -1.38724900 | -6.39770700 | -2.03259200 |
| H  | -2.15503200 | -6.87117300 | -0.50154200 |
| C  | -3.26820200 | -4.54067400 | -2.83560300 |
| H  | -3.89556100 | -5.25469500 | -3.38169900 |
| H  | -3.78479900 | -3.57493200 | -2.83926300 |
| H  | -2.32940900 | -4.42174900 | -3.38813900 |
| C  | -4.35625900 | -5.21180400 | -0.65452500 |
| H  | -4.99350200 | -5.93221200 | -1.18048300 |
| H  | -4.20230000 | -5.57669900 | 0.36709000  |
| H  | -4.90475700 | -4.26575500 | -0.59389700 |
| C  | -5.01312200 | 2.03108900  | -1.83089500 |

|   |             |            |             |
|---|-------------|------------|-------------|
| H | -4.99290500 | 0.98228800 | -2.14592300 |
| H | -5.93790400 | 2.47495300 | -2.21743400 |
| H | -4.16749200 | 2.54192000 | -2.30489900 |
| C | -6.16567600 | 1.44714900 | 0.34139900  |
| H | -7.10320300 | 1.88029800 | -0.02646200 |
| H | -6.17261800 | 0.37983600 | 0.09455200  |
| H | -6.15437200 | 1.53903000 | 1.43320800  |
| C | -5.05537200 | 3.67765900 | 0.05323000  |
| H | -5.06511200 | 3.84804600 | 1.13569200  |
| H | -4.22568900 | 4.24878400 | -0.37840300 |
| H | -5.98752200 | 4.08667700 | -0.35150600 |

### CP8'-t

|    |             |             |             |
|----|-------------|-------------|-------------|
| Ni | 0.25747200  | 0.30542100  | 1.27106000  |
| I  | 0.82675000  | 0.65158400  | 3.79586300  |
| C  | 6.56777000  | -1.73781300 | 0.83079200  |
| C  | 5.55954700  | -0.84287700 | 1.11258900  |
| C  | 4.49859300  | -0.62122700 | 0.18858300  |
| C  | 4.50298100  | -1.35467500 | -1.04487200 |
| C  | 5.55768400  | -2.26639700 | -1.30630400 |
| C  | 6.57072200  | -2.45710600 | -0.39059000 |
| H  | 3.46722600  | 0.84741900  | 1.38581100  |
| H  | 7.36922600  | -1.89556900 | 1.54791800  |
| H  | 5.55694100  | -0.29163700 | 2.04984200  |
| C  | 3.45258800  | 0.29730600  | 0.44733700  |
| C  | 3.43597000  | -1.12624300 | -1.95709700 |
| H  | 5.55515600  | -2.81416000 | -2.24674900 |
| H  | 7.37410100  | -3.15793200 | -0.60163900 |
| C  | 2.42555700  | -0.23979600 | -1.67096700 |
| C  | 2.39957900  | 0.51329700  | -0.44852900 |
| H  | 3.43245500  | -1.66741700 | -2.90179700 |
| H  | 1.63027100  | -0.09598800 | -2.39617800 |
| C  | 1.29222500  | 1.42644600  | -0.10644200 |
| H  | 1.62894800  | 2.19812700  | 0.59512000  |
| C  | 0.44153300  | 2.01344600  | -1.22786700 |
| H  | -0.03436200 | 1.20753300  | -1.80746600 |
| H  | -0.38960500 | 2.57735400  | -0.77957500 |
| C  | 1.46003700  | 5.54120500  | -3.70605200 |
| C  | 2.38697100  | 5.18014100  | -2.53580500 |
| C  | 1.70100800  | 4.23088300  | -1.53997800 |
| C  | 1.16760300  | 2.95630400  | -2.22104600 |
| C  | 0.24590800  | 3.33241100  | -3.39760200 |
| C  | 0.92658000  | 4.27859300  | -4.39944500 |
| H  | 2.39953400  | 3.96567800  | -0.73768400 |
| H  | 3.29291700  | 4.69579600  | -2.92951300 |
| H  | 2.72077100  | 6.08998100  | -2.02000300 |
| H  | 0.61146000  | 6.13060800  | -3.32672400 |
| H  | 1.98559100  | 6.17974900  | -4.42817200 |
| H  | 2.03231600  | 2.41369600  | -2.63382000 |
| H  | -0.09370500 | 2.42161200  | -3.91111100 |
| H  | -0.65926300 | 3.81874900  | -2.99952500 |
| H  | 1.76354700  | 3.75154200  | -4.88134100 |
| H  | 0.22661000  | 4.54972400  | -5.20115300 |
| H  | 0.85902400  | 4.75629300  | -1.06067500 |
| C  | -2.39776100 | -0.29557300 | 0.27932600  |
| C  | -2.40845100 | 1.74039800  | 1.38492800  |
| C  | -3.76162200 | 1.93285200  | 1.12069800  |
| C  | -4.47604400 | 0.96865100  | 0.39755500  |
| C  | -3.75462900 | -0.16074200 | -0.01734800 |
| C  | -1.57378400 | -1.47052300 | -0.10331000 |
| C  | 0.52958800  | -2.43875400 | 0.00077300  |
| C  | 0.09248700  | -3.57439800 | -0.67656500 |
| C  | -1.23936700 | -3.66871500 | -1.09737300 |

|   |             |             |             |
|---|-------------|-------------|-------------|
| C | -2.06806400 | -2.57761900 | -0.79234600 |
| H | -1.83411400 | 2.46292500  | 1.95670400  |
| H | -4.23817800 | 2.83247900  | 1.48936100  |
| H | -4.25805400 | -0.94225600 | -0.57372200 |
| H | 1.55921800  | -2.34174100 | 0.32777000  |
| H | 0.80486800  | -4.36745500 | -0.86557600 |
| H | -3.10948500 | -2.59708500 | -1.09035000 |
| N | -0.27693700 | -1.40981600 | 0.28462100  |
| N | -1.73708000 | 0.66122800  | 0.97123800  |
| C | -5.96968600 | 1.10057400  | 0.06357700  |
| C | -1.80225200 | -4.88322400 | -1.85075300 |
| C | -6.57114500 | 2.41087400  | 0.60606300  |
| H | -7.63309100 | 2.46239800  | 0.34316100  |
| H | -6.49944400 | 2.47280500  | 1.69776000  |
| H | -6.08295300 | 3.29338400  | 0.17733500  |
| C | -6.73797900 | -0.08700400 | 0.69253100  |
| H | -7.80638100 | -0.00623500 | 0.46130700  |
| H | -6.38789500 | -1.05182200 | 0.31024200  |
| H | -6.62589000 | -0.09675000 | 1.78238700  |
| C | -6.15110800 | 1.07896400  | -1.47346900 |
| H | -7.21377700 | 1.16965100  | -1.72639500 |
| H | -5.61743100 | 1.91125100  | -1.94584500 |
| H | -5.78277900 | 0.14819000  | -1.91800600 |
| C | -2.95415600 | -5.50515500 | -1.02459400 |
| H | -3.77302000 | -4.79619300 | -0.86199700 |
| H | -3.36646800 | -6.37333400 | -1.55160700 |
| H | -2.59994900 | -5.84007100 | -0.04335500 |
| C | -2.34199200 | -4.42322200 | -3.22660800 |
| H | -2.74981500 | -5.28049500 | -3.77455700 |
| H | -3.14221400 | -3.68195500 | -3.12759600 |
| H | -1.54578700 | -3.97931300 | -3.83462300 |
| C | -0.73215500 | -5.96616200 | -2.08526400 |
| H | 0.10232000  | -5.59259500 | -2.68939400 |
| H | -0.32919700 | -6.35380900 | -1.14288400 |
| H | -1.17692600 | -6.80949200 | -2.62425800 |

### CP4'

|    |             |             |             |
|----|-------------|-------------|-------------|
| Ni | 1.92853800  | -0.00041400 | 0.00002600  |
| I  | 4.42742100  | -0.00024800 | -0.00001200 |
| C  | -0.81246200 | 0.74119000  | 0.00005300  |
| C  | 0.52481900  | 2.63116100  | -0.00016700 |
| C  | -0.58364100 | 3.47341600  | -0.00017000 |
| C  | -1.87581400 | 2.93182800  | -0.00001000 |
| C  | -1.96104800 | 1.53097400  | 0.00009200  |
| C  | -0.81263200 | -0.74110400 | 0.00009000  |
| C  | 0.52424900  | -2.63137200 | 0.00010200  |
| C  | -0.58439100 | -3.47337500 | 0.00005100  |
| C  | -1.87645700 | -2.93151100 | 0.00003300  |
| C  | -1.96138900 | -1.53064300 | 0.00003900  |
| H  | 1.53513600  | 3.02886800  | -0.00025500 |
| H  | -0.41889200 | 4.54376300  | -0.00032800 |
| H  | -2.93369800 | 1.05276200  | 0.00021500  |
| H  | 1.53448100  | -3.02928800 | 0.00007500  |
| H  | -0.41987800 | -4.54375700 | -0.00003700 |
| H  | -2.93393500 | -1.05222000 | -0.00001700 |
| N  | 0.42673000  | -1.29498100 | 0.00012900  |
| N  | 0.42701900  | 1.29481200  | -0.00004600 |
| C  | -3.15107200 | 3.78819700  | 0.00001700  |
| C  | -3.15190300 | -3.78760600 | -0.00005200 |
| C  | -2.83617700 | 5.29610500  | -0.00043600 |
| H  | -3.77161500 | 5.86585900  | -0.00039900 |
| H  | -2.26854500 | 5.59550300  | 0.88786500  |
| H  | -2.26889500 | 5.59503700  | -0.88911700 |

|   |             |             |             |
|---|-------------|-------------|-------------|
| C | -3.98300500 | 3.46355700  | 1.26431000  |
| H | -4.89851500 | 4.06637000  | 1.27622100  |
| H | -4.27918600 | 2.40975200  | 1.30163400  |
| H | -3.41781600 | 3.68611100  | 2.17626600  |
| C | -3.98354100 | 3.46292200  | -1.26375500 |
| H | -4.89906400 | 4.06571700  | -1.27556800 |
| H | -3.41875000 | 3.68503600  | -2.17606400 |
| H | -4.27972800 | 2.40909600  | -1.30043900 |
| C | -3.98403600 | -3.46252900 | 1.26399700  |
| H | -4.27993600 | -2.40863500 | 1.30106900  |
| H | -4.89971300 | -4.06509100 | 1.27580700  |
| H | -3.41911300 | -3.68507700 | 2.17611800  |
| C | -3.98403600 | -3.46240100 | -1.26406200 |
| H | -4.89966800 | -4.06502800 | -1.27596900 |
| H | -4.28002200 | -2.40852800 | -1.30100000 |
| H | -3.41908400 | -3.68478200 | -2.17620700 |
| C | -2.83735600 | -5.29558700 | -0.00014000 |
| H | -2.26981000 | -5.59479200 | -0.88856200 |
| H | -2.27012700 | -5.59497500 | 0.88842000  |
| H | -3.77292500 | -5.86512600 | -0.00035600 |

### TS5'

|    |             |             |             |
|----|-------------|-------------|-------------|
| Ni | -1.20968100 | 0.00007800  | -1.06542200 |
| I  | -3.57267400 | 0.00023600  | -1.91382700 |
| C  | -4.52300400 | -0.00022700 | 3.54199400  |
| C  | -3.66064700 | -1.27252900 | 3.53495600  |
| C  | -2.68759000 | -1.27917600 | 2.32625700  |
| C  | -1.91030600 | -0.00023800 | 2.26057700  |
| C  | -2.68745500 | 1.27877000  | 2.32651100  |
| C  | -3.66051200 | 1.27198500  | 3.53520900  |
| H  | -2.02165900 | -2.14957600 | 2.37807900  |
| H  | -3.08036900 | -1.32333600 | 4.46779300  |
| H  | -4.29796200 | -2.16638000 | 3.50633300  |
| H  | -5.17230600 | -0.00010400 | 2.65445100  |
| H  | -5.18651100 | -0.00027900 | 4.41708600  |
| H  | -0.84450100 | -0.00031500 | 2.47511900  |
| H  | -2.02143200 | 2.14908900  | 2.37850500  |
| H  | -3.28882000 | 1.39107800  | 1.40956000  |
| H  | -3.08022800 | 1.32254400  | 4.46805600  |
| H  | -4.29773300 | 2.16590900  | 3.50676400  |
| H  | -3.28896700 | -1.39123800 | 1.40928400  |
| C  | 1.43742400  | -0.74111900 | -0.34871500 |
| C  | 0.15010900  | -2.63278100 | -0.70006000 |
| C  | 1.22111300  | -3.47378500 | -0.41090300 |
| C  | 2.46782000  | -2.93057100 | -0.07318800 |
| C  | 2.54761100  | -1.52977200 | -0.04989000 |
| C  | 1.43744900  | 0.74113200  | -0.34865800 |
| C  | 0.15020200  | 2.63286400  | -0.69986600 |
| C  | 1.22123600  | 3.47380900  | -0.41064600 |
| C  | 2.46792300  | 2.93052600  | -0.07296900 |
| C  | 2.54766400  | 1.52972300  | -0.04977300 |
| H  | -0.82365200 | -3.03226600 | -0.96669500 |
| H  | 1.06391100  | -4.54436900 | -0.45559600 |
| H  | 3.48609700  | -1.05036700 | 0.20341000  |
| H  | -0.82354500 | 3.03240300  | -0.96647500 |
| H  | 1.06407100  | 4.54440300  | -0.45526100 |
| H  | 3.48613400  | 1.05026700  | 0.20349000  |
| N  | 0.24181500  | 1.29623600  | -0.67295800 |
| N  | 0.24177000  | -1.29615700 | -0.67305700 |
| C  | 3.70068300  | -3.78517500 | 0.25770600  |
| C  | 3.70081500  | 3.78506300  | 0.25798800  |
| C  | 3.39899400  | -5.29352600 | 0.17548600  |
| H  | 4.30311200  | -5.86202400 | 0.41857000  |

|   |            |             |             |
|---|------------|-------------|-------------|
| H | 2.62042600 | -5.59396600 | 0.88578300  |
| H | 3.08246600 | -5.59293000 | -0.83003800 |
| C | 4.17586700 | -3.46010900 | 1.69450700  |
| H | 5.05786700 | -4.06158900 | 1.94358200  |
| H | 4.45062300 | -2.40588800 | 1.80742500  |
| H | 3.39376200 | -3.68385800 | 2.42863600  |
| C | 4.83202700 | -3.45814200 | -0.74677600 |
| H | 5.72053800 | -4.05911200 | -0.52062500 |
| H | 4.52358300 | -3.68099400 | -1.77431200 |
| H | 5.12533700 | -2.40368800 | -0.70561300 |
| C | 4.17599000 | 3.45987300  | 1.69476400  |
| H | 4.45071000 | 2.40563500  | 1.80760300  |
| H | 5.05801000 | 4.06130500  | 1.94388300  |
| H | 3.39389400 | 3.68359400  | 2.42891100  |
| C | 4.83214700 | 3.45806400  | -0.74651900 |
| H | 5.72068000 | 4.05898600  | -0.52032400 |
| H | 5.12542000 | 2.40359700  | -0.70543500 |
| H | 4.52371100 | 3.68100300  | -1.77403900 |
| C | 3.39918000 | 5.29343100  | 0.17588000  |
| H | 3.08266200 | 5.59292100  | -0.82962100 |
| H | 2.62062300 | 5.59384500  | 0.88620000  |
| H | 4.30331800 | 5.86187900  | 0.41900600  |

**TS6'-t**

|    |             |             |             |
|----|-------------|-------------|-------------|
| Ni | 1.20847700  | 0.00044700  | -1.09741000 |
| I  | 3.58313300  | 0.00075300  | -1.90243500 |
| C  | 4.54297700  | -0.00000700 | 3.44642600  |
| C  | 3.68202600  | 1.27019100  | 3.53101600  |
| C  | 2.59853100  | 1.28557600  | 2.42487600  |
| C  | 1.83228000  | -0.00077400 | 2.39515000  |
| C  | 2.59946500  | -1.28657900 | 2.42435400  |
| C  | 3.68295500  | -1.27086900 | 3.53049200  |
| H  | 1.92695600  | 2.14305000  | 2.56043400  |
| H  | 3.19435600  | 1.31149600  | 4.51583700  |
| H  | 4.31249200  | 2.16529900  | 3.44866900  |
| H  | 5.09574300  | 0.00039200  | 2.49576100  |
| H  | 5.29390900  | 0.00010300  | 4.24767500  |
| H  | 0.74660200  | -0.00120000 | 2.40759800  |
| H  | 1.92851000  | -2.14459400 | 2.55956300  |
| H  | 3.10905900  | -1.43635300 | 1.45597500  |
| H  | 3.19532200  | -1.31294200 | 4.51529900  |
| H  | 4.31407400  | -2.16548200 | 3.44776700  |
| H  | 3.10802100  | 1.43611700  | 1.45656100  |
| C  | -1.43376000 | 0.74119100  | -0.36468700 |
| C  | -0.14739400 | 2.63279400  | -0.72011500 |
| C  | -1.21680500 | 3.47380500  | -0.42481600 |
| C  | -2.46186900 | 2.93061100  | -0.08147500 |
| C  | -2.54218200 | 1.52971300  | -0.05961000 |
| C  | -1.43353900 | -0.74124600 | -0.36484200 |
| C  | -0.14661400 | -2.63238800 | -0.72070500 |
| C  | -1.21576300 | -3.47378300 | -0.42554800 |
| C  | -2.46097700 | -2.93103500 | -0.08204600 |
| C  | -2.54171300 | -1.53016600 | -0.05988900 |
| H  | 0.82537600  | 3.03222900  | -0.99035900 |
| H  | -1.05940400 | 4.54437400  | -0.46872900 |
| H  | -3.47955300 | 1.05035000  | 0.19778700  |
| H  | 0.82626900  | -3.03147000 | -0.99106400 |
| H  | -1.05804200 | -4.54429500 | -0.46969100 |
| H  | -3.47921700 | -1.05113900 | 0.19764800  |
| N  | -0.23907800 | -1.29593300 | -0.69392700 |
| N  | -0.23945400 | 1.29630400  | -0.69362100 |
| C  | -3.69254300 | 3.78521800  | 0.25728400  |
| C  | -3.69137900 | -3.78608300 | 0.25658900  |

|   |             |             |             |
|---|-------------|-------------|-------------|
| C | -3.39080100 | 5.29355400  | 0.17507400  |
| H | -4.29338900 | 5.86201000  | 0.42381300  |
| H | -2.60827500 | 5.59297200  | 0.88142800  |
| H | -3.07979600 | 5.59403000  | -0.83185800 |
| C | -4.15952700 | 3.45853200  | 1.69643100  |
| H | -5.03977900 | 4.06014200  | 1.95124100  |
| H | -4.43417800 | 2.40431700  | 1.80964800  |
| H | -3.37313500 | 3.68099700  | 2.42633400  |
| C | -4.82964600 | 3.45959700  | -0.74114300 |
| H | -5.71660300 | 4.06061800  | -0.50918900 |
| H | -4.52707200 | 3.68355200  | -1.77018700 |
| H | -5.12316500 | 2.40521900  | -0.69946400 |
| C | -4.15840000 | -3.45983300 | 1.69582200  |
| H | -4.43336500 | -2.40572400 | 1.80926700  |
| H | -5.03845900 | -4.06176100 | 1.95054700  |
| H | -3.37191000 | -3.68221000 | 2.42564600  |
| C | -4.82862200 | -3.46060200 | -0.74172400 |
| H | -5.71538800 | -4.06193700 | -0.50985400 |
| H | -5.12245800 | -2.40632000 | -0.69981800 |
| H | -4.52602500 | -3.68425700 | -1.77082600 |
| C | -3.38918500 | -5.29431100 | 0.17405800  |
| H | -3.07813100 | -5.59448800 | -0.83294900 |
| H | -2.60653800 | -5.59363700 | 0.88031700  |
| H | -4.29159000 | -5.86309100 | 0.42271900  |

**CP9'-t**

|    |             |             |             |
|----|-------------|-------------|-------------|
| Ni | -1.52431000 | -0.00187000 | 0.29636300  |
| I  | -3.26320600 | 0.00390900  | 2.22847900  |
| C  | -4.00224400 | -0.00989200 | -3.86657200 |
| C  | -3.21128700 | 1.25996400  | -3.51853600 |
| C  | -2.77235700 | 1.25735700  | -2.03635200 |
| C  | -1.98522500 | -0.00552600 | -1.66564900 |
| C  | -2.77189200 | -1.27005800 | -2.03176300 |
| C  | -3.21083800 | -1.27820200 | -3.51393000 |
| H  | -2.17733200 | 2.16046700  | -1.83548200 |
| H  | -2.31699000 | 1.31553100  | -4.15777800 |
| H  | -3.81185100 | 2.15441600  | -3.73712500 |
| H  | -4.94844500 | -0.00904200 | -3.30484900 |
| H  | -4.27201800 | -0.01187800 | -4.93161900 |
| H  | -1.02530900 | -0.00634200 | -2.20987400 |
| H  | -2.17657400 | -2.17225300 | -1.82764700 |
| H  | -3.67209200 | -1.34194300 | -1.40219000 |
| H  | -2.31653400 | -1.33578000 | -4.15298300 |
| H  | -3.81109200 | -2.17365600 | -3.72924800 |
| H  | -3.67256600 | 1.33120200  | -1.40702700 |
| C  | 1.27050200  | -0.74131200 | 0.15019900  |
| C  | -0.03555000 | -2.64599400 | 0.33488100  |
| C  | 1.07355300  | -3.47864100 | 0.21952300  |
| C  | 2.34975100  | -2.92335600 | 0.05479200  |
| C  | 2.42000000  | -1.52297200 | 0.02405000  |
| C  | 1.26919100  | 0.74233300  | 0.14868000  |
| C  | -0.04034200 | 2.64503500  | 0.32915900  |
| C  | 1.06730800  | 3.47943000  | 0.21238700  |
| C  | 2.34454800  | 2.92610300  | 0.04917300  |
| C  | 2.41733700  | 1.52578000  | 0.02133200  |
| H  | -1.03362300 | -3.05219500 | 0.46764100  |
| H  | 0.92342800  | -4.55008900 | 0.26309500  |
| H  | 3.38168700  | -1.03849200 | -0.09588800 |
| H  | -1.03919200 | 3.04965300  | 0.46091000  |
| H  | 0.91525100  | 4.55069400  | 0.25373000  |
| H  | 3.37994000  | 1.04278600  | -0.09723300 |
| N  | 0.04837300  | 1.31095500  | 0.29436200  |
| N  | 0.05072800  | -1.31181100 | 0.29739700  |

|   |            |             |             |   |             |             |             |
|---|------------|-------------|-------------|---|-------------|-------------|-------------|
| C | 3.62563700 | -3.76790000 | -0.08277800 | N | -0.00295700 | -1.25726900 | 0.03480400  |
| C | 3.61895300 | 3.77265500  | -0.08976000 | N | 0.46306300  | 1.30391800  | -0.08513200 |
| C | 3.32961200 | -5.27848800 | -0.02353100 | C | 4.38559900  | 3.10429600  | 0.57481500  |
| H | 4.26478900 | -5.83909700 | -0.12695400 | C | 3.15045600  | -4.26172900 | -0.39218100 |
| H | 2.87587000 | -5.56933100 | 0.93061300  | C | 4.34939300  | 4.64425300  | 0.57740600  |
| H | 2.66389600 | -5.59697900 | -0.83367400 | H | 5.35826100  | 5.03420900  | 0.75024800  |
| C | 4.59656000 | -3.41484000 | 1.06992400  | H | 4.00021900  | 5.04643900  | -0.38023900 |
| H | 5.51314600 | -4.00972200 | 0.98323900  | H | 3.70419700  | 5.03653800  | 1.37147600  |
| H | 4.88441000 | -2.35818300 | 1.05576200  | C | 5.34675900  | 2.63990800  | -0.54600900 |
| H | 4.14486100 | -3.62690300 | 2.04538500  | H | 6.34369700  | 3.06667300  | -0.38600900 |
| C | 4.29899300 | -3.45476800 | -1.44085900 | H | 5.45266600  | 1.54998000  | -0.57065200 |
| H | 5.21369200 | -4.04860200 | -1.55144400 | H | 4.99177600  | 2.96558200  | -1.53016100 |
| H | 3.63333100 | -3.69736600 | -2.27671400 | C | 4.92042000  | 2.62501200  | 1.94595000  |
| H | 4.57648900 | -2.39885500 | -1.52817100 | H | 5.91381400  | 3.05021700  | 2.13056100  |
| C | 4.59010900 | 3.42383700  | 1.06404000  | H | 4.25876200  | 2.94183000  | 2.75985700  |
| H | 4.87989100 | 2.36767800  | 1.05224400  | H | 5.01208000  | 1.53456100  | 1.99285800  |
| H | 5.50563900 | 4.02020400  | 0.97640600  | C | 3.96922700  | -3.94719400 | -1.66765600 |
| H | 4.13767400 | 3.63716200  | 2.03888400  | H | 4.42426500  | -2.95175500 | -1.62868600 |
| C | 4.29335700 | 3.45782700  | -1.44692700 | H | 4.77804500  | -4.67797900 | -1.78308500 |
| H | 5.20701500 | 4.05308300  | -1.55847000 | H | 3.33892500  | -3.99363200 | -2.56266300 |
| H | 4.57280100 | 2.40223400  | -1.53187100 | C | 4.07471900  | -4.18591800 | 0.84711600  |
| H | 3.62755400 | 3.69741600  | -2.28353700 | H | 4.88573600  | -4.91752400 | 0.75511000  |
| C | 3.32016700 | 5.28282800  | -0.03387300 | H | 4.53138500  | -3.19663700 | 0.95852700  |
| H | 2.65417900 | 5.59836200  | -0.84495000 | H | 3.52119600  | -4.40636200 | 1.76675000  |
| H | 2.86553400 | 5.57489900  | 0.91947000  | C | 2.60356900  | -5.69729300 | -0.50529900 |
| H | 4.25436600 | 5.84490900  | -0.13815600 | H | 2.02888800  | -5.98676900 | 0.38181200  |
|   |            |             |             | H | 1.96450600  | -5.82314400 | -1.38655900 |
|   |            |             |             | H | 3.43757600  | -6.40070000 | -0.60120800 |

### CP10'

|    |             |             |             |
|----|-------------|-------------|-------------|
| Ni | -1.29057800 | 0.22135200  | -0.01785600 |
| I  | -2.76671900 | 2.07798300  | -1.02021900 |
| C  | -5.54390700 | -1.69842800 | 1.34668000  |
| C  | -4.74713300 | -2.41401500 | 0.24502900  |
| C  | -3.71136600 | -1.47037800 | -0.40547800 |
| C  | -2.78568000 | -0.84024300 | 0.64334200  |
| C  | -3.59902700 | -0.10642500 | 1.72372500  |
| C  | -4.61296300 | -1.06241800 | 2.39034000  |
| H  | -3.13726900 | -2.02402300 | -1.16371700 |
| H  | -4.22792600 | -3.28093100 | 0.68427000  |
| H  | -5.42805400 | -2.81305800 | -0.51976500 |
| H  | -6.15932900 | -0.91020100 | 0.88870100  |
| H  | -6.23991200 | -2.39832900 | 1.82935000  |
| H  | -2.25587700 | -1.64993500 | 1.17351300  |
| H  | -2.93324700 | 0.31574200  | 2.48952800  |
| H  | -4.14141600 | 0.73660900  | 1.28270600  |
| H  | -4.07276400 | -1.85752600 | 2.92740300  |
| H  | -5.20097900 | -0.51986400 | 3.14365300  |
| H  | -4.23601700 | -0.67548200 | -0.94880000 |
| C  | 1.57023700  | 0.54192500  | 0.07854000  |
| C  | 0.60882100  | 2.63449000  | -0.04932400 |
| C  | 1.83887700  | 3.25843300  | 0.15137000  |
| C  | 2.99676300  | 2.49471400  | 0.33385600  |
| C  | 2.82880800  | 1.10244300  | 0.29152400  |
| C  | 1.31322300  | -0.90981200 | 0.00790400  |
| C  | -0.29590900 | -2.56051500 | -0.10120800 |
| C  | 0.66661200  | -3.55579700 | -0.23944300 |
| C  | 2.02618100  | -3.22709200 | -0.24577400 |
| C  | 2.32200200  | -1.86240000 | -0.12382600 |
| H  | -0.30129400 | 3.20608300  | -0.19880600 |
| H  | 1.86738500  | 4.34104100  | 0.16391000  |
| H  | 3.68226900  | 0.45147100  | 0.44105000  |
| H  | -1.34702700 | -2.81557100 | -0.09750100 |
| H  | 0.33018100  | -4.57994300 | -0.34352600 |
| H  | 3.35274300  | -1.53002800 | -0.15443600 |

### TS7'

|    |             |             |             |
|----|-------------|-------------|-------------|
| Ni | -0.14507900 | -1.58047800 | -0.05916600 |
| C  | 0.83607800  | -4.49024500 | 3.26692800  |
| C  | -0.67169600 | -4.44404600 | 2.98217700  |
| C  | -1.01091100 | -3.44958600 | 1.84473100  |
| C  | -0.18073000 | -3.77519400 | 0.59687000  |
| C  | 1.32920000  | -3.78410700 | 0.87190700  |
| C  | 1.64063400  | -4.80085900 | 1.99663400  |
| H  | -2.08349400 | -3.49663700 | 1.62249100  |
| H  | -1.02085400 | -5.44343700 | 2.68817700  |
| H  | -1.22849100 | -4.16877700 | 3.88599700  |
| H  | 1.16114800  | -3.52175900 | 3.67557600  |
| H  | 1.04737600  | -5.23904600 | 4.03918300  |
| H  | -0.44918300 | -4.77902600 | 0.26209600  |
| H  | 1.88455800  | -4.04890900 | -0.03617700 |
| H  | 1.69186100  | -2.79840600 | 1.19481100  |
| H  | 1.39856900  | -5.81290700 | 1.64368900  |
| H  | 2.71663900  | -4.78932900 | 2.20916500  |
| H  | -0.80235600 | -2.43070100 | 2.21104600  |
| C  | -5.37400800 | 2.65394900  | -2.67297700 |
| C  | -4.21343600 | 1.93412100  | -2.85002100 |
| C  | -3.96980700 | 0.75100200  | -2.09738400 |
| C  | -4.95905100 | 0.32121000  | -1.15089100 |
| C  | -6.14271800 | 1.08448800  | -0.99226300 |
| C  | -6.34801000 | 2.22737200  | -1.73647300 |
| H  | -2.05039600 | 0.31799500  | -2.98111700 |
| H  | -5.55001300 | 3.55316500  | -3.25650100 |
| H  | -3.46877900 | 2.25868200  | -3.57286300 |
| C  | -2.79017000 | -0.01319200 | -2.25450800 |
| C  | -4.71025400 | -0.86930000 | -0.41152800 |
| H  | -6.89124000 | 0.75158600  | -0.27730200 |
| H  | -7.26047000 | 2.80287500  | -1.61079000 |
| C  | -3.55686900 | -1.59346400 | -0.58652500 |
| C  | -2.55242600 | -1.17978700 | -1.52352800 |



|              |             |             |             |   |             |             |             |
|--------------|-------------|-------------|-------------|---|-------------|-------------|-------------|
| H            | -5.46282700 | -1.21102300 | 0.29538700  | C | -0.21859600 | -0.21952800 | 4.38953900  |
| H            | -3.41887900 | -2.50802400 | -0.01699900 | H | 0.28579900  | -2.31653600 | 4.35279400  |
| C            | -1.30836200 | -1.91287400 | -1.72201800 | H | -0.54840900 | 1.89794500  | 4.13414200  |
| H            | -0.68444400 | -1.56283500 | -2.54214700 | H | -0.64694000 | -0.25273500 | 5.38822900  |
| C            | -1.03572600 | -3.24217500 | -1.20324800 | I | 4.91502100  | 1.06309400  | 1.18799400  |
| H            | -1.91285000 | -3.81189800 | -0.90577500 | C | 2.57401100  | -4.56149800 | -1.84827000 |
| H            | -0.34329700 | -3.83359800 | -1.79912100 | C | 2.95972000  | -3.96525000 | -0.48806500 |
| C            | 0.95270700  | 0.94818900  | 0.66952400  | C | 2.54033700  | -2.47999800 | -0.38756800 |
| C            | -1.09930400 | 0.63981400  | 1.70843800  | C | 1.03259000  | -2.30007000 | -0.63555300 |
| C            | -1.03296600 | 1.88668100  | 2.32025200  | C | 0.67870400  | -2.87501700 | -2.01841200 |
| C            | 0.07905800  | 2.71240000  | 2.10868800  | C | 1.08033600  | -4.36235300 | -2.14074600 |
| C            | 1.07434100  | 2.20562900  | 1.25615500  | H | 2.83579100  | -2.12500200 | 0.61286800  |
| C            | 1.94897300  | 0.36930600  | -0.26829400 | H | 2.46679100  | -4.53403900 | 0.31452500  |
| C            | 2.46714700  | -1.42796800 | -1.63373800 | H | 4.04070000  | -4.05523400 | -0.32085500 |
| C            | 3.64888400  | -0.83095400 | -2.06037800 | H | 3.16270700  | -4.07018900 | -2.63631400 |
| C            | 4.01196700  | 0.42952700  | -1.56736800 | H | 2.83297000  | -5.62805200 | -1.88219000 |
| C            | 3.12088500  | 1.01759800  | -0.65462900 | H | 0.52236400  | -2.87836500 | 0.14861700  |
| H            | -1.96224800 | -0.00382500 | 1.84888600  | H | -0.38957500 | -2.76402100 | -2.24197100 |
| H            | -1.85542600 | 2.19724300  | 2.95190300  | H | 1.20745600  | -2.30195700 | -2.78906800 |
| H            | 1.95046900  | 2.80657900  | 1.04711600  | H | 0.48960500  | -4.96397400 | -1.43152100 |
| H            | 2.17446700  | -2.40497800 | -2.00638000 | H | 0.83518600  | -4.73356300 | -3.14506200 |
| H            | 4.27049500  | -1.36000800 | -2.77159200 | H | 3.12167800  | -1.91354900 | -1.12623100 |
| H            | 3.34782000  | 1.99405600  | -0.24526300 | C | -2.73652800 | -0.46646500 | -0.13383400 |
| N            | 1.63229800  | -0.85635500 | -0.75672500 | C | -2.05902400 | -2.66520100 | -0.11740400 |
| N            | -0.13141800 | 0.16624900  | 0.90961700  | C | -3.34744700 | -3.11822900 | 0.14564800  |
| C            | 0.23298800  | 4.09973500  | 2.74552600  | C | -4.39600800 | -2.20417600 | 0.29115000  |
| C            | 5.29784100  | 1.15838000  | -1.97966300 | C | -4.04835900 | -0.85589000 | 0.14432600  |
| C            | -0.96675400 | 4.46077400  | 3.64156600  | C | -2.33915500 | 0.94632800  | -0.30008600 |
| H            | -0.81146900 | 5.45378500  | 4.07481800  | C | -0.59413300 | 2.42681700  | -0.55641600 |
| H            | -1.90560700 | 4.49405800  | 3.07729000  | C | -1.45414200 | 3.51965300  | -0.58379600 |
| H            | -1.08487300 | 3.75668200  | 4.47307200  | C | -2.83607800 | 3.32642100  | -0.48211100 |
| C            | 0.34661400  | 5.16066900  | 1.62283500  | C | -3.25735800 | 1.99854400  | -0.34034000 |
| H            | 0.45657000  | 6.15648700  | 2.06549800  | H | -1.25133600 | -3.37763900 | -0.22046600 |
| H            | 1.21501200  | 4.98911600  | 0.97763000  | H | -3.50679200 | -4.18562600 | 0.23689000  |
| H            | -0.54863400 | 5.16796300  | 0.99137300  | H | -4.80972000 | -0.09479900 | 0.25979500  |
| C            | 1.51774700  | 4.11846000  | 3.61011600  | H | 0.47291900  | 2.57078300  | -0.67131600 |
| H            | 1.64066700  | 5.10585800  | 4.06790800  | H | -1.02389100 | 4.50694400  | -0.69665100 |
| H            | 1.46590800  | 3.37690700  | 4.41499200  | H | -4.31568700 | 1.78060900  | -0.27130000 |
| H            | 2.41728800  | 3.91476500  | 3.01920100  | N | -1.00771600 | 1.15876400  | -0.41914500 |
| C            | 4.92377900  | 2.51045900  | -2.63586300 | N | -1.73254300 | -1.37265600 | -0.25813300 |
| H            | 4.37033700  | 3.16310200  | -1.95209200 | C | -5.84394000 | -2.61171300 | 0.59695200  |
| H            | 5.83447700  | 3.04123100  | -2.93345300 | C | -3.85837200 | 4.47109700  | -0.52606700 |
| H            | 4.31140600  | 2.36127000  | -3.53203000 | C | -6.00148900 | -4.13973700 | 0.71166900  |
| C            | 6.15958600  | 1.41397900  | -0.71848900 | H | -7.04661800 | -4.38523400 | 0.92821100  |
| H            | 7.08031700  | 1.93622200  | -0.99978300 | H | -5.72996200 | -4.64983300 | -0.21952800 |
| H            | 5.64007100  | 2.03561800  | 0.01871000  | H | -5.39165300 | -4.55383900 | 1.52257000  |
| H            | 6.43990600  | 0.47344900  | -0.23142400 | C | -6.76545000 | -2.10843600 | -0.54034400 |
| C            | 6.12996200  | 0.33934900  | -2.98438400 | H | -7.80414100 | -2.39096100 | -0.33373700 |
| H            | 6.44881700  | -0.62229100 | -2.56641400 | H | -6.73258500 | -1.01854600 | -0.64358300 |
| H            | 5.58187500  | 0.15033100  | -3.91440000 | H | -6.47965600 | -2.54616400 | -1.50336500 |
| H            | 7.03466800  | 0.89644900  | -3.24705900 | C | -6.27962500 | -1.97191400 | 1.93738900  |
|              |             |             |             | H | -7.31376300 | -2.25291700 | 2.16777900  |
|              |             |             |             | H | -5.64320900 | -2.31146100 | 2.76212900  |
|              |             |             |             | H | -6.23217000 | -0.87818700 | 1.90517600  |
|              |             |             |             | C | -4.80784600 | 4.25732500  | -1.72973800 |
|              |             |             |             | H | -5.35720900 | 3.31251000  | -1.65717500 |
|              |             |             |             | H | -5.54476400 | 5.06757100  | -1.77360100 |
|              |             |             |             | H | -4.25247200 | 4.25162700  | -2.67416400 |
|              |             |             |             | C | -4.67851200 | 4.47207300  | 0.78659000  |
|              |             |             |             | H | -5.41463800 | 5.28393800  | 0.76754000  |
|              |             |             |             | H | -5.22387200 | 3.53326900  | 0.93130100  |
|              |             |             |             | H | -4.03028900 | 4.62211200  | 1.65721900  |
|              |             |             |             | C | -3.17999500 | 5.84572500  | -0.67798300 |
|              |             |             |             | H | -2.50917300 | 6.06560400  | 0.16021400  |
| <b>TS12'</b> |             |             |             |   |             |             |             |
| Ni           | 0.16141800  | -0.54749100 | -0.41296600 |   |             |             |             |
| I            | 1.91311300  | 0.66070100  | -2.30597600 |   |             |             |             |
| Zn           | 2.52788500  | 0.27742900  | 0.45796000  |   |             |             |             |
| C            | 0.90675100  | -0.13485100 | 1.76968600  |   |             |             |             |
| C            | 0.86272700  | -1.32504300 | 2.52727800  |   |             |             |             |
| C            | 0.38442400  | 1.01817800  | 2.40081500  |   |             |             |             |
| C            | 0.30386600  | -1.37568900 | 3.80709500  |   |             |             |             |
| H            | 1.27428200  | -2.24417600 | 2.11944700  |   |             |             |             |
| C            | -0.16770500 | 0.98409500  | 3.68325600  |   |             |             |             |
| H            | 0.41108300  | 1.97782300  | 1.88927700  |   |             |             |             |

|   |             |            |             |
|---|-------------|------------|-------------|
| H | -2.60483200 | 5.91738600 | -1.60786800 |
| H | -3.94376900 | 6.63029600 | -0.70245100 |

### CP12'

|    |             |             |             |
|----|-------------|-------------|-------------|
| Ni | 1.45021400  | 0.23072400  | -0.02893400 |
| C  | 2.58073300  | 1.72183100  | -0.32029300 |
| C  | 3.12152800  | 2.51629900  | 0.71099900  |
| C  | 2.83699000  | 2.14693600  | -1.63982900 |
| C  | 3.85700600  | 3.67658600  | 0.44587100  |
| H  | 2.97234900  | 2.22159600  | 1.74940600  |
| C  | 3.58043200  | 3.30109300  | -1.91599900 |
| H  | 2.44879800  | 1.56918000  | -2.47820900 |
| C  | 4.09150800  | 4.07594600  | -0.87266600 |
| H  | 4.25409800  | 4.26648600  | 1.27062100  |
| H  | 3.76090100  | 3.59403200  | -2.94919000 |
| H  | 4.66859600  | 4.97352000  | -1.08310700 |
| C  | 4.76801700  | -3.21532700 | 0.80143200  |
| C  | 4.93885300  | -2.35605800 | -0.46034800 |
| C  | 3.63722100  | -1.60657400 | -0.81769900 |
| C  | 3.09176000  | -0.78804800 | 0.36830300  |
| C  | 2.96716100  | -1.63163900 | 1.65675600  |
| C  | 4.28216400  | -2.37049500 | 1.98882400  |
| H  | 3.82316000  | -0.93636100 | -1.66709500 |
| H  | 5.73578600  | -1.61880000 | -0.28357800 |
| H  | 5.26927100  | -2.97880400 | -1.30437400 |
| H  | 4.03466200  | -4.01355300 | 0.60073100  |
| H  | 5.71093800  | -3.72089900 | 1.05166700  |
| H  | 3.86968500  | -0.04833900 | 0.59083000  |
| H  | 2.69450600  | -0.98137300 | 2.49972400  |
| H  | 2.16666600  | -2.38234300 | 1.59084700  |
| H  | 5.05601300  | -1.62969200 | 2.23872300  |
| H  | 4.15302900  | -3.00235000 | 2.87972400  |
| H  | 2.90750400  | -2.34901200 | -1.17882700 |
| C  | -1.40458400 | 0.63744800  | 0.03044600  |
| C  | -0.32060800 | 2.67159100  | -0.07098000 |
| C  | -1.51791900 | 3.36735700  | 0.07906900  |
| C  | -2.72376600 | 2.67357700  | 0.22947800  |
| C  | -2.63357300 | 1.27454000  | 0.20122900  |
| C  | -1.23837000 | -0.82857000 | -0.04355300 |
| C  | 0.25709200  | -2.57193600 | -0.18003400 |
| C  | -0.76671800 | -3.50931000 | -0.29257000 |
| C  | -2.10247600 | -3.09620600 | -0.27147500 |
| C  | -2.30983500 | -1.71548100 | -0.14988600 |
| H  | 0.62342700  | 3.19298200  | -0.17364900 |
| H  | -1.48351400 | 4.44998500  | 0.08190700  |
| H  | -3.52875600 | 0.67618500  | 0.32357000  |
| H  | 1.28947400  | -2.88939800 | -0.19873900 |
| H  | -0.49648200 | -4.55306600 | -0.39597400 |
| H  | -3.31936300 | -1.32220600 | -0.15717100 |
| N  | 0.05316100  | -1.25382100 | -0.04472200 |
| N  | -0.24700400 | 1.33264000  | -0.09275000 |
| C  | -4.08251300 | 3.36397600  | 0.41926900  |
| C  | -3.29260800 | -4.05937700 | -0.38635700 |
| C  | -3.95714600 | 4.89925500  | 0.41444200  |
| H  | -4.94676200 | 5.34871100  | 0.55077700  |
| H  | -3.31672500 | 5.25919600  | 1.22748800  |
| H  | -3.55292200 | 5.27299600  | -0.53306700 |
| C  | -4.69116100 | 2.92763500  | 1.77377900  |
| H  | -5.66398000 | 3.41099600  | 1.92192600  |
| H  | -4.84721400 | 1.84468000  | 1.82382800  |
| H  | -4.03994400 | 3.21169400  | 2.60796700  |
| C  | -5.03119700 | 2.94817300  | -0.73080800 |
| H  | -6.00713100 | 3.43203200  | -0.60699800 |

|   |             |             |             |
|---|-------------|-------------|-------------|
| H | -4.62519600 | 3.24636400  | -1.70396400 |
| H | -5.19791500 | 1.86587600  | -0.75393000 |
| C | -4.18088700 | -3.92280700 | 0.87373800  |
| H | -4.57151600 | -2.90639800 | 0.99172000  |
| H | -5.03820300 | -4.60252100 | 0.80463100  |
| H | -3.62002000 | -4.17440500 | 1.78084100  |
| C | -4.12086400 | -3.69949200 | -1.64341500 |
| H | -4.97646300 | -4.37856100 | -1.73636900 |
| H | -4.51147700 | -2.67725700 | -1.59882300 |
| H | -3.51605100 | -3.78847800 | -2.55278300 |
| C | -2.83932000 | -5.52668800 | -0.50568600 |
| H | -2.22903700 | -5.69423700 | -1.40032000 |
| H | -2.26340900 | -5.84859900 | 0.36932200  |
| H | -3.71740700 | -6.17728300 | -0.57989400 |

### TS13'

|    |             |             |             |
|----|-------------|-------------|-------------|
| Ni | 1.40676600  | -0.10223100 | -0.01139500 |
| C  | 2.90846400  | -1.21552600 | -0.03787900 |
| C  | 3.22613900  | -1.98364600 | -1.20854200 |
| C  | 3.03437900  | -1.91181500 | 1.20923400  |
| C  | 3.57626600  | -3.32480600 | -1.13330600 |
| H  | 3.18267800  | -1.50418700 | -2.18429400 |
| C  | 3.36353800  | -3.26520800 | 1.26570100  |
| H  | 2.85207500  | -1.37900100 | 2.13897500  |
| C  | 3.64466000  | -3.99020100 | 0.10307800  |
| H  | 3.79382200  | -3.86964400 | -2.05091300 |
| H  | 3.41414500  | -3.75826100 | 2.23533300  |
| H  | 3.92363900  | -5.03892000 | 0.15405900  |
| C  | 4.57270800  | 3.23693000  | 0.00592100  |
| C  | 4.73163800  | 2.32251000  | 1.23075500  |
| C  | 3.61770000  | 1.25774200  | 1.29311200  |
| C  | 3.56588400  | 0.44488300  | -0.01851700 |
| C  | 3.38754600  | 1.36300600  | -1.25274700 |
| C  | 4.50472300  | 2.42666100  | -1.29799400 |
| H  | 3.79944400  | 0.58844000  | 2.14165700  |
| H  | 5.70751200  | 1.81710800  | 1.17892800  |
| H  | 4.73630600  | 2.91882100  | 2.15331100  |
| H  | 3.64856200  | 3.82688500  | 0.11278200  |
| H  | 5.39636400  | 3.96150400  | -0.03904400 |
| H  | 4.57931400  | 0.04179800  | -0.12928700 |
| H  | 3.41035600  | 0.76832200  | -2.17334100 |
| H  | 2.41459400  | 1.87232500  | -1.23991100 |
| H  | 5.46950200  | 1.92316000  | -1.45977800 |
| H  | 4.35219400  | 3.09626000  | -2.15526800 |
| H  | 2.65851200  | 1.75449900  | 1.49071100  |
| C  | -1.37671200 | -0.62826200 | -0.07032900 |
| C  | -0.17004700 | -2.57417500 | -0.41072500 |
| C  | -1.31831800 | -3.35310600 | -0.32241500 |
| C  | -2.56273200 | -2.75489200 | -0.06544500 |
| C  | -2.55857000 | -1.36003100 | 0.06406500  |
| C  | -1.29706600 | 0.83999400  | 0.03270100  |
| C  | 0.09153700  | 2.66275400  | 0.30175000  |
| C  | -0.97376500 | 3.55402200  | 0.23814100  |
| C  | -2.27820500 | 3.07311300  | 0.04728800  |
| C  | -2.40727300 | 1.68290800  | -0.06038800 |
| H  | 0.80414600  | -3.01985900 | -0.58754800 |
| H  | -1.22350600 | -4.42468100 | -0.45147400 |
| H  | -3.48044300 | -0.83507900 | 0.29062900  |
| H  | 1.10314300  | 3.03205600  | 0.44480000  |
| H  | -0.76913300 | 4.61296100  | 0.34111700  |
| H  | -3.38250100 | 1.24352800  | -0.23873000 |
| N  | -0.03639500 | 1.32945400  | 0.20648900  |
| N  | -0.17927300 | -1.23539300 | -0.29191300 |

|   |             |             |             |
|---|-------------|-------------|-------------|
| C | -3.86968800 | -3.54864900 | 0.08529700  |
| C | -3.51086000 | 3.98378900  | -0.05617100 |
| C | -3.65491100 | -5.06159000 | -0.10991400 |
| H | -4.61006900 | -5.58658700 | 0.00244900  |
| H | -3.26617700 | -5.29297900 | -1.10811500 |
| H | -2.96210800 | -5.47420300 | 0.63206600  |
| C | -4.89093900 | -3.06289900 | -0.97125600 |
| H | -5.83128500 | -3.61860800 | -0.87321700 |
| H | -5.12111500 | -1.99806200 | -0.85782200 |
| H | -4.50929900 | -3.21693300 | -1.98696100 |
| C | -4.44774500 | -3.31838600 | 1.50242800  |
| H | -5.38438500 | -3.87574900 | 1.62491700  |
| H | -3.74619100 | -3.65821400 | 2.27257400  |
| H | -4.66266400 | -2.26074600 | 1.68900400  |
| C | -4.17398800 | 3.79093800  | -1.44134100 |
| H | -4.49562500 | 2.75621200  | -1.60018400 |
| H | -5.05901000 | 4.43248900  | -1.52912600 |
| H | -3.48161800 | 4.05417400  | -2.24892000 |
| C | -4.52082300 | 3.60738800  | 1.05446900  |
| H | -5.40958700 | 4.24638100  | 0.98976200  |
| H | -4.85251300 | 2.56711300  | 0.96972100  |
| H | -4.07945100 | 3.73862500  | 2.04892200  |
| C | -3.14681400 | 5.47201900  | 0.10429900  |
| H | -2.69062900 | 5.67769000  | 1.07939000  |
| H | -2.45597300 | 5.80977000  | -0.67655200 |
| H | -4.05315200 | 6.08284500  | 0.02879500  |

### CP1-2

|    |             |             |             |
|----|-------------|-------------|-------------|
| Ni | 0.22185000  | -2.07448600 | -0.40562500 |
| C  | 3.90756200  | 0.13098700  | 2.08566000  |
| C  | 4.98728200  | -0.89376500 | 1.67451000  |
| C  | 2.58717900  | -0.51222100 | 1.62503600  |
| H  | 3.93411500  | 0.34590600  | 3.15665200  |
| H  | 4.06549800  | 1.07151100  | 1.54915900  |
| H  | 5.24879900  | -1.57839200 | 2.49552700  |
| H  | 5.91391700  | -0.42173600 | 1.32811300  |
| H  | 1.85326700  | 0.20049000  | 1.24319900  |
| H  | 2.09924200  | -1.09580300 | 2.41657600  |
| N  | 4.35524400  | -1.63330000 | 0.58398800  |
| C  | 5.08399300  | -2.58492000 | -0.22935500 |
| H  | 5.50308500  | -3.38853800 | 0.39034500  |
| H  | 4.39159000  | -3.01575200 | -0.95410400 |
| H  | 5.90558800  | -2.08755300 | -0.75832200 |
| C  | 3.00895000  | -1.47932400 | 0.53415700  |
| O  | 2.27436000  | -2.06954200 | -0.27198900 |
| C  | -6.72601900 | 0.56097800  | -0.63082500 |
| C  | -5.80735600 | -0.44756400 | -0.82302600 |
| C  | -4.61901700 | -0.51297700 | -0.04410100 |
| C  | -4.39677400 | 0.49479800  | 0.95036900  |
| C  | -5.36184200 | 1.52012700  | 1.12475600  |
| C  | -6.50307400 | 1.55624400  | 0.35240600  |
| H  | -3.84249100 | -2.30421800 | -0.96572600 |
| H  | -7.62881900 | 0.59620800  | -1.23522100 |
| H  | -5.97949500 | -1.21182600 | -1.57776900 |
| C  | -3.65410900 | -1.53893400 | -0.21422200 |
| C  | -3.20680500 | 0.41654500  | 1.72600800  |
| H  | -5.18593600 | 2.28061400  | 1.88286600  |
| H  | -7.23544400 | 2.34632800  | 0.49540700  |
| C  | -2.29193800 | -0.59003600 | 1.53203000  |
| C  | -2.49346000 | -1.60674000 | 0.54581200  |
| H  | -3.03087700 | 1.17215300  | 2.48940500  |
| H  | -1.39475300 | -0.61775500 | 2.14290700  |
| C  | -1.51219200 | -2.68547800 | 0.31283400  |

|   |             |             |             |
|---|-------------|-------------|-------------|
| H | -1.88371800 | -3.47152800 | -0.34878500 |
| C | -0.42910200 | -3.02129100 | 1.18023800  |
| H | -0.29602500 | -2.50606100 | 2.13216100  |
| H | -0.07138200 | -4.05144100 | 1.18793900  |
| C | 1.17545900  | 4.91332500  | 0.64135400  |
| C | 0.39636300  | 3.82046200  | 0.33122600  |
| C | 0.91516300  | 2.75283300  | -0.45301900 |
| C | 2.26898900  | 2.83625800  | -0.91821700 |
| C | 3.04481600  | 3.97683300  | -0.58355900 |
| C | 2.51280900  | 4.99380200  | 0.18020500  |
| H | -0.88408300 | 1.55432900  | -0.42336600 |
| H | 0.76479500  | 5.72172900  | 1.24046800  |
| H | -0.63129900 | 3.75820100  | 0.68144100  |
| C | 0.13990700  | 1.61277200  | -0.78638700 |
| C | 2.77478400  | 1.76578300  | -1.70825700 |
| H | 4.06910400  | 4.03813000  | -0.94539300 |
| H | 3.11623500  | 5.86283700  | 0.42843600  |
| C | 1.99898400  | 0.67354600  | -2.01093900 |
| C | 0.65213800  | 0.56637000  | -1.54441500 |
| H | 3.79342300  | 1.83175600  | -2.08548200 |
| H | 2.40930400  | -0.12033800 | -2.62627900 |
| C | -0.19880200 | -0.60009400 | -1.83675300 |
| H | -1.26467500 | -0.42381700 | -1.70691100 |
| C | 0.19733800  | -1.78601600 | -2.43870000 |
| H | 1.21305600  | -1.94376800 | -2.79298400 |
| H | -0.55277400 | -2.46042400 | -2.84370100 |

### CP1-3

|    |             |             |             |
|----|-------------|-------------|-------------|
| Ni | 1.26749500  | 0.05694300  | 0.54423000  |
| C  | 5.83772100  | 1.91098500  | 0.18021900  |
| C  | 6.40090100  | 0.69977400  | -0.59508800 |
| C  | 4.46825100  | 1.42603500  | 0.68960900  |
| H  | 6.50855200  | 2.23278400  | 0.98063700  |
| H  | 5.70553700  | 2.75535000  | -0.50427500 |
| H  | 7.05502800  | 0.07256700  | 0.03019600  |
| H  | 6.97215800  | 0.98992000  | -1.48452500 |
| H  | 3.68305400  | 2.18379900  | 0.69454200  |
| H  | 4.51460000  | 1.01477500  | 1.70608800  |
| N  | 5.20293800  | -0.04137300 | -0.97819200 |
| C  | 5.24438300  | -1.16961700 | -1.88547800 |
| H  | 5.88272000  | -1.97043500 | -1.48818600 |
| H  | 4.22730600  | -1.54641000 | -2.00469000 |
| H  | 5.63812100  | -0.86135400 | -2.86117900 |
| C  | 4.10352600  | 0.29472100  | -0.25357600 |
| O  | 3.01038700  | -0.27677100 | -0.36594200 |
| C  | -2.83635100 | -2.86241700 | -0.90866900 |
| C  | -2.24058200 | -3.49939100 | 0.36509500  |
| C  | -1.61501200 | -2.26147000 | -1.62563800 |
| H  | -3.38116400 | -3.59119100 | -1.51439100 |
| H  | -3.53079700 | -2.06436400 | -0.63028700 |
| H  | -2.01725600 | -4.56979600 | 0.23437500  |
| H  | -2.89900500 | -3.40220700 | 1.23599000  |
| H  | -1.81522200 | -1.31209600 | -2.12788700 |
| H  | -1.18296200 | -2.94569600 | -2.36784800 |
| N  | -1.00546900 | -2.74915400 | 0.57922700  |
| C  | -0.22284700 | -2.90200100 | 1.78824400  |
| H  | 0.16426500  | -3.92687900 | 1.87547300  |
| H  | 0.60982200  | -2.19469800 | 1.75518600  |
| H  | -0.83992200 | -2.68413100 | 2.66740100  |
| C  | -0.59660000 | -2.05778300 | -0.51370800 |
| O  | 0.44391800  | -1.39557100 | -0.61814100 |
| C  | -6.07972500 | 0.70268300  | -0.08418600 |
| C  | -4.97218500 | 0.39153700  | 0.67612600  |

|   |             |             |             |
|---|-------------|-------------|-------------|
| C | -3.70373200 | 0.97869600  | 0.40369800  |
| C | -3.60631300 | 1.91195400  | -0.68148300 |
| C | -4.76390800 | 2.21216800  | -1.44296100 |
| C | -5.97776800 | 1.62184300  | -1.15657900 |
| H | -2.63871800 | -0.02229900 | 1.99109100  |
| H | -7.03978400 | 0.24476800  | 0.14175700  |
| H | -5.05573900 | -0.30671200 | 1.50708000  |
| C | -2.54414700 | 0.67728900  | 1.16123100  |
| C | -2.33542600 | 2.49808200  | -0.94227100 |
| H | -4.67870900 | 2.92232000  | -2.26333000 |
| H | -6.85724800 | 1.86197600  | -1.74825800 |
| C | -1.23126700 | 2.17586000  | -0.19324500 |
| C | -1.29950100 | 1.23957200  | 0.89045600  |
| H | -2.24919000 | 3.21248500  | -1.75908300 |
| H | -0.27340200 | 2.62867800  | -0.43041900 |
| C | -0.11020400 | 0.83990600  | 1.65881100  |
| H | -0.35467400 | 0.22344200  | 2.52926400  |
| C | 1.14907700  | 1.55822900  | 1.70196600  |
| H | 1.22303500  | 2.54312500  | 1.22869000  |
| H | 1.71326400  | 1.51037100  | 2.63810900  |

### CP1-4

|    |             |             |             |
|----|-------------|-------------|-------------|
| Ni | 0.04116600  | 0.44739100  | 0.17075800  |
| C  | -2.03433100 | -1.56262400 | -1.10109700 |
| C  | -2.25968300 | -0.10187400 | -1.53431000 |
| C  | -2.22923500 | -1.53102200 | 0.42352000  |
| H  | -2.73513300 | -2.23422800 | -1.60574800 |
| H  | -1.01742500 | -1.88368700 | -1.33677800 |
| H  | -3.32954400 | 0.10382500  | -1.69631800 |
| H  | -1.71569100 | 0.17410900  | -2.44144300 |
| H  | -1.56993000 | -2.22215500 | 0.95373400  |
| H  | -3.26302000 | -1.76061800 | 0.71839200  |
| N  | -1.79926600 | 0.70896000  | -0.38317300 |
| C  | -2.27625400 | 2.09769600  | -0.32829700 |
| H  | -3.36513300 | 2.13287300  | -0.47763700 |
| H  | -2.04238900 | 2.50229500  | 0.65717300  |
| H  | -1.78620200 | 2.69176100  | -1.10340600 |
| C  | -1.95563900 | -0.08747100 | 0.83914100  |
| O  | -2.11784900 | 0.41811300  | 1.94730700  |
| C  | 2.73823100  | 1.13945400  | -1.13111200 |
| C  | 2.85995900  | 0.95480600  | 0.39187000  |
| C  | 2.31044200  | -0.25000300 | -1.62612400 |
| H  | 1.96508000  | 1.88263000  | -1.35447300 |
| H  | 3.67924800  | 1.48425200  | -1.57027500 |
| H  | 2.72066100  | 1.87945300  | 0.95860300  |
| H  | 3.84095200  | 0.53051500  | 0.65749300  |
| H  | 3.18173500  | -0.88606200 | -1.84126000 |
| H  | 1.69092500  | -0.23065800 | -2.52626400 |
| N  | 1.81050400  | -0.03174300 | 0.72744000  |
| C  | 1.92550600  | -0.69929300 | 2.03010900  |
| H  | 1.67115500  | -0.00253800 | 2.83222100  |
| H  | 1.23724300  | -1.54467800 | 2.03997500  |
| H  | 2.94926700  | -1.07214700 | 2.17736300  |
| C  | 1.56674300  | -0.88947300 | -0.44792500 |
| O  | 1.21565700  | -2.07231100 | -0.36319200 |

### CP1-5

|    |            |             |             |
|----|------------|-------------|-------------|
| Ni | 0.19555900 | -0.54282000 | -0.12734100 |
| C  | 3.01474500 | -3.18643500 | -1.34966500 |
| C  | 3.44525400 | -2.48714700 | -0.04578400 |
| C  | 1.51340400 | -2.83435000 | -1.47719800 |
| H  | 3.61088500 | -2.85723400 | -2.20706800 |
| H  | 3.15073100 | -4.26830800 | -1.24643000 |

|   |             |             |             |
|---|-------------|-------------|-------------|
| H | 3.77395200  | -1.44601800 | -0.24847100 |
| H | 4.27027700  | -2.99960000 | 0.46495400  |
| H | 0.89450900  | -3.72103700 | -1.66407200 |
| H | 1.32280200  | -2.12822500 | -2.29064500 |
| N | 2.23862700  | -2.52103300 | 0.75986800  |
| C | 2.29714800  | -1.85336100 | 2.03723900  |
| H | 2.56181600  | -0.78019700 | 1.94468300  |
| H | 1.31881300  | -1.92575200 | 2.51875200  |
| H | 3.04337500  | -2.33739800 | 2.67985300  |
| C | 1.12714900  | -2.21683800 | -0.11485100 |
| O | -0.11037600 | -2.28846600 | 0.35714100  |
| C | -4.47607600 | -1.68959500 | 0.19853200  |
| C | -5.07244600 | -0.28587000 | -0.04394500 |
| C | -3.03288200 | -1.41299300 | 0.65473900  |
| H | -5.05915200 | -2.26193400 | 0.92449600  |
| H | -4.46899500 | -2.25191800 | -0.74115300 |
| H | -5.61179000 | 0.09682700  | 0.83680200  |
| H | -5.76380500 | -0.25472600 | -0.89431200 |
| H | -2.28084200 | -2.13004700 | 0.31547200  |
| H | -2.94321500 | -1.35904100 | 1.74813500  |
| N | -3.89583900 | 0.53525200  | -0.31533000 |
| C | -3.99308200 | 1.89322900  | -0.80307400 |
| H | -4.52813200 | 2.53467100  | -0.08888800 |
| H | -2.98007500 | 2.27526500  | -0.94063400 |
| H | -4.52647500 | 1.92088900  | -1.76088400 |
| C | -2.73063400 | -0.03367000 | 0.09954200  |
| O | -1.62697000 | 0.52884400  | 0.03561100  |
| C | 2.47248200  | 4.30672900  | -0.51268900 |
| C | 1.69329900  | 4.07900000  | 0.79851900  |
| C | 1.91095200  | 3.22986900  | -1.45499700 |
| H | 2.35369100  | 5.32476200  | -0.89229800 |
| H | 3.54008800  | 4.13522900  | -0.34024100 |
| H | 0.79144900  | 4.70785000  | 0.86058000  |
| H | 2.29539600  | 4.27543200  | 1.69297700  |
| H | 2.64198300  | 2.80911100  | -2.14988400 |
| H | 1.06762200  | 3.59960400  | -2.05306400 |
| N | 1.32225000  | 2.66659100  | 0.73963300  |
| C | 0.75583300  | 1.99930700  | 1.89657300  |
| H | -0.20534000 | 2.45201400  | 2.17395500  |
| H | 0.59393600  | 0.94288300  | 1.65241000  |
| H | 1.44585300  | 2.07813200  | 2.74474700  |
| C | 1.38629000  | 2.15260100  | -0.51598600 |
| O | 1.07373500  | 1.01452200  | -0.88839500 |

### TS14

|    |            |             |             |
|----|------------|-------------|-------------|
| Ni | 0.49015500 | -1.38909700 | -0.09637400 |
| I  | 4.12004300 | 1.10961500  | -0.47162300 |
| C  | 4.96922800 | -2.92836900 | 0.95522600  |
| C  | 4.62363700 | -2.61021600 | -0.50511500 |
| C  | 3.12096600 | -2.28930900 | -0.68191600 |
| C  | 2.56698100 | -1.32770900 | 0.34233500  |
| C  | 3.05696300 | -1.45414400 | 1.76203200  |
| C  | 4.56122300 | -1.78058900 | 1.88787200  |
| H  | 2.91618900 | -1.93618500 | -1.69630500 |
| H  | 5.20486000 | -1.74647200 | -0.84411600 |
| H  | 4.87774500 | -3.45700600 | -1.15457900 |
| H  | 4.46174100 | -3.85584700 | 1.26346000  |
| H  | 6.04557600 | -3.11886200 | 1.04767400  |
| H  | 2.02823500 | -0.39738300 | 0.05053700  |
| H  | 2.79882500 | -0.55675500 | 2.33155200  |
| H  | 2.50710400 | -2.28900200 | 2.21987100  |
| H  | 5.13692100 | -0.88194100 | 1.64328300  |
| H  | 4.77788700 | -2.03872700 | 2.93181300  |

|   |             |             |             |
|---|-------------|-------------|-------------|
| H | 2.56991600  | -3.23669000 | -0.55516700 |
| C | -6.83102500 | -1.85457800 | -1.13010500 |
| C | -5.55988200 | -2.37531800 | -1.23082700 |
| C | -4.55085300 | -2.01685000 | -0.29520700 |
| C | -4.87983300 | -1.10460800 | 0.76024700  |
| C | -6.19856000 | -0.58675700 | 0.83686300  |
| C | -7.15414000 | -0.95176800 | -0.08733000 |
| H | -2.99480200 | -3.23711900 | -1.16355700 |
| H | -7.59291200 | -2.13584900 | -1.85188400 |
| H | -5.31075700 | -3.06968600 | -2.02993500 |
| C | -3.23183800 | -2.53238900 | -0.36816700 |
| C | -3.86354900 | -0.75617900 | 1.69345900  |
| H | -6.44444600 | 0.10378200  | 1.64022600  |
| H | -8.16083900 | -0.54895900 | -0.01836200 |
| C | -2.59496400 | -1.26905400 | 1.59222100  |
| C | -2.24822000 | -2.17926500 | 0.54688900  |
| H | -4.10717000 | -0.06554000 | 2.49721700  |
| H | -1.84289300 | -0.97570400 | 2.31751400  |
| C | -0.90453300 | -2.77267200 | 0.42809700  |
| H | -0.83376200 | -3.56519000 | -0.31714900 |
| C | 0.13164800  | -2.67645600 | 1.37065100  |
| H | -0.00857600 | -2.15554200 | 2.31612800  |
| H | 0.88657800  | -3.45851800 | 1.38839700  |
| C | -0.69345000 | 5.65812300  | 0.94392600  |
| C | 0.03552800  | 4.60779000  | 0.43133800  |
| C | -0.61788400 | 3.44925600  | -0.07121800 |
| C | -2.04902600 | 3.38899100  | -0.03719400 |
| C | -2.77048200 | 4.48841800  | 0.49526100  |
| C | -2.10854800 | 5.59821700  | 0.97575400  |
| H | 1.19127000  | 2.40737000  | -0.63742400 |
| H | -0.18454500 | 6.53882300  | 1.32594500  |
| H | 1.12153300  | 4.64754700  | 0.40402300  |
| C | 0.10503500  | 2.35420400  | -0.60799800 |
| C | -2.69018200 | 2.22441300  | -0.54559300 |
| H | -3.85689300 | 4.44195500  | 0.51767600  |
| H | -2.67197400 | 6.43429800  | 1.38137200  |
| C | -1.96531500 | 1.17573800  | -1.05364900 |
| C | -0.53841700 | 1.22236100  | -1.09319000 |
| H | -3.77621600 | 2.17363900  | -0.52767500 |
| H | -2.48672700 | 0.30467900  | -1.43640200 |
| C | 0.27914700  | 0.13271600  | -1.65607100 |
| H | 1.31668700  | 0.40740700  | -1.85431900 |
| C | -0.15797700 | -1.09445100 | -2.10455500 |
| H | -1.20984000 | -1.36221900 | -2.12473500 |
| H | 0.50460500  | -1.72245800 | -2.69478900 |

**CP13**

|    |             |            |             |
|----|-------------|------------|-------------|
| Ni | 0.39244700  | 1.15487300 | 0.08000300  |
| C  | 2.55257800  | 5.37662700 | -0.45436500 |
| C  | 1.11841800  | 5.40528200 | 0.08993800  |
| C  | 0.37226500  | 4.07740200 | -0.21363700 |
| C  | 1.17784100  | 2.91531800 | 0.34417400  |
| C  | 2.59083600  | 2.83781700 | -0.22449200 |
| C  | 3.33433800  | 4.16952100 | 0.07961300  |
| H  | -0.63132800 | 4.11366700 | 0.22672700  |
| H  | 1.13643400  | 5.56807300 | 1.17615300  |
| H  | 0.55244900  | 6.23764000 | -0.34470500 |
| H  | 2.52662500  | 5.33820400 | -1.55283600 |
| H  | 3.07224000  | 6.30460600 | -0.18801600 |
| H  | 1.21308100  | 2.98683400 | 1.43761000  |
| H  | 3.15649800  | 1.99963500 | 0.20045500  |
| H  | 2.56702500  | 2.69353700 | -1.31155600 |
| H  | 3.47155400  | 4.26593500 | 1.16520900  |

|   |             |             |             |
|---|-------------|-------------|-------------|
| H | 4.33579600  | 4.12388000  | -0.36439100 |
| H | 0.25700900  | 3.98938400  | -1.30187200 |
| C | 4.99911400  | -3.96830000 | -0.50274100 |
| C | 4.62865600  | -2.76420700 | 0.05176100  |
| C | 3.26600800  | -2.50394900 | 0.36561900  |
| C | 2.28149900  | -3.51398600 | 0.09778900  |
| C | 2.69730400  | -4.74317000 | -0.47270600 |
| C | 4.02615400  | -4.96448700 | -0.76666500 |
| H | 3.59847700  | -0.52444200 | 1.15641200  |
| H | 6.04119300  | -4.16178300 | -0.73840400 |
| H | 5.37270200  | -1.99955000 | 0.25938800  |
| C | 2.84795800  | -1.28221800 | 0.94052100  |
| C | 0.92278600  | -3.24737200 | 0.42821300  |
| H | 1.95418400  | -5.51069500 | -0.67190000 |
| H | 4.33474200  | -5.91023900 | -1.20211000 |
| C | 0.54160900  | -2.05222000 | 0.98643200  |
| C | 1.51168300  | -1.03399400 | 1.25245100  |
| H | 0.18136200  | -4.02114300 | 0.24651800  |
| H | -0.49845100 | -1.89433600 | 1.25144200  |
| C | 1.15938700  | 0.26361100  | 1.83771000  |
| H | 2.00469300  | 0.86838400  | 2.16195800  |
| C | -0.11133400 | 0.74696200  | 2.08962000  |
| H | -1.00089200 | 0.13347300  | 1.96735100  |
| H | -0.24521900 | 1.66381300  | 2.65433500  |
| C | -6.51628800 | -0.51866300 | 0.84126700  |
| C | -5.53096200 | 0.38114100  | 0.50373800  |
| C | -4.33465800 | -0.06242900 | -0.12582200 |
| C | -4.16779800 | -1.46101600 | -0.40574600 |
| C | -5.20236000 | -2.35977800 | -0.04679700 |
| C | -6.35022000 | -1.89837200 | 0.56353100  |
| H | -3.43853200 | 1.89262500  | -0.29381400 |
| H | -7.42807600 | -0.17451100 | 1.31980400  |
| H | -5.65588500 | 1.44087300  | 0.71045300  |
| C | -3.30423500 | 0.83136100  | -0.49350600 |
| C | -2.97057400 | -1.89169900 | -1.04708500 |
| H | -5.08108600 | -3.41798500 | -0.26220400 |
| H | -7.13784700 | -2.59570500 | 0.83312200  |
| C | -1.98290600 | -1.00337800 | -1.39055700 |
| C | -2.13397100 | 0.39259000  | -1.11311500 |
| H | -2.85604300 | -2.94731000 | -1.27951600 |
| H | -1.09416600 | -1.36179800 | -1.89942100 |
| C | -1.12740500 | 1.38743800  | -1.47647800 |
| H | -1.45492800 | 2.42124400  | -1.39275500 |
| C | 0.13578600  | 1.15331200  | -1.99136800 |
| H | 0.46393000  | 0.15367400  | -2.27180300 |
| H | 0.70488300  | 1.97270600  | -2.41550800 |

**TS15**

|    |             |             |             |
|----|-------------|-------------|-------------|
| Ni | -0.36494700 | -1.57173200 | -1.43960900 |
| C  | 6.90348300  | -0.29944800 | 1.51291000  |
| C  | 5.82273400  | -1.07590600 | 1.15767300  |
| C  | 4.99132300  | -0.70761500 | 0.06460400  |
| C  | 5.29589300  | 0.48718000  | -0.66566000 |
| C  | 6.41787800  | 1.26428600  | -0.27590400 |
| C  | 7.20419500  | 0.88122400  | 0.79009500  |
| H  | 3.66326000  | -2.40747300 | 0.20757100  |
| H  | 7.53169900  | -0.59121300 | 2.34990900  |
| H  | 5.59106200  | -1.98416200 | 1.70876200  |
| C  | 3.87612500  | -1.48814300 | -0.33441500 |
| C  | 4.45507300  | 0.84843200  | -1.75636400 |
| H  | 6.64870100  | 2.16825700  | -0.83459400 |
| H  | 8.06111500  | 1.48370100  | 1.07861100  |
| C  | 3.38152500  | 0.07300300  | -2.11499100 |

|   |             |             |             |
|---|-------------|-------------|-------------|
| C | 3.07355500  | -1.12981700 | -1.40902200 |
| H | 4.67726200  | 1.75899100  | -2.30719700 |
| H | 2.76428700  | 0.37469200  | -2.95555600 |
| C | 2.01118700  | -2.05233700 | -1.82706000 |
| H | 1.95302700  | -2.97903800 | -1.25970700 |
| C | 1.22573600  | -1.96269900 | -2.94542300 |
| H | 1.30849500  | -1.13176900 | -3.64193800 |
| H | 0.70690500  | -2.84663400 | -3.29817500 |
| C | 3.58652700  | 4.93680500  | 0.73012700  |
| C | 3.34735600  | 3.58054200  | 0.77348200  |
| C | 2.03101400  | 3.06819300  | 0.60412000  |
| C | 0.95502500  | 3.99078800  | 0.39269500  |
| C | 1.23491600  | 5.38052500  | 0.35083300  |
| C | 2.52220900  | 5.84636000  | 0.51521700  |
| H | 2.57166600  | 0.98973300  | 0.81904500  |
| H | 4.59669300  | 5.31509000  | 0.86339400  |
| H | 4.16375600  | 2.88251500  | 0.93869700  |
| C | 1.74948100  | 1.67920600  | 0.64757800  |
| C | -0.35947200 | 3.46818500  | 0.23898800  |
| H | 0.41381200  | 6.07554200  | 0.18982000  |
| H | 2.72427300  | 6.91365900  | 0.48358300  |
| C | -0.60234900 | 2.11925500  | 0.29455400  |
| C | 0.45864100  | 1.18133700  | 0.50264000  |
| H | -1.18418300 | 4.15894900  | 0.07939700  |
| H | -1.61895200 | 1.76197200  | 0.17738300  |
| C | 0.21593300  | -0.25861400 | 0.64495200  |
| H | 1.10421100  | -0.86188200 | 0.82127400  |
| C | -1.01344100 | -0.84105300 | 0.88915400  |
| H | -1.93823200 | -0.30134300 | 0.72273000  |
| H | -1.09313400 | -1.91356100 | 1.02077000  |
| C | -6.11100100 | 3.30673600  | 0.43881600  |
| C | -5.59408300 | 2.04519800  | 0.24225200  |
| C | -4.58121100 | 1.81823400  | -0.72914900 |
| C | -4.10769100 | 2.92548000  | -1.50609500 |
| C | -4.66108600 | 4.21249700  | -1.27992800 |
| C | -5.64046400 | 4.40071400  | -0.32825600 |
| H | -4.40088700 | -0.30673200 | -0.37612500 |
| H | -6.88484000 | 3.46740200  | 1.18434300  |
| H | -5.95578100 | 1.20368200  | 0.82842100  |
| C | -4.02473000 | 0.53306700  | -0.95734000 |
| C | -3.09704700 | 2.68559700  | -2.47926600 |
| H | -4.30114300 | 5.04972100  | -1.87342000 |
| H | -6.05753400 | 5.39044200  | -0.16416400 |
| C | -2.57849900 | 1.43023600  | -2.67442400 |
| C | -3.03709700 | 0.31534700  | -1.90832700 |
| H | -2.73527900 | 3.52151900  | -3.07321200 |
| H | -1.80830000 | 1.28525100  | -3.42565600 |
| C | -2.55028000 | -1.05508800 | -2.12934500 |
| H | -3.02094100 | -1.82419000 | -1.52016600 |
| C | -1.73254300 | -1.47634800 | -3.14879300 |
| H | -1.35448900 | -0.78987800 | -3.90196100 |
| H | -1.66571100 | -2.53453900 | -3.37486400 |
| I | -0.85653200 | -4.21068600 | -0.80367600 |
| C | -2.13212500 | -2.19021800 | 5.58291600  |
| C | -0.73644000 | -1.57385000 | 5.39621900  |
| C | -0.39242800 | -1.41949300 | 3.89093000  |
| C | -1.48194900 | -0.65760100 | 3.19212700  |
| C | -2.86569400 | -1.22421600 | 3.34178400  |
| C | -3.21387900 | -1.38393400 | 4.84663700  |
| H | 0.57880300  | -0.92612000 | 3.76935600  |
| H | -0.70504300 | -0.58605600 | 5.87741900  |
| H | 0.02575900  | -2.19133000 | 5.88917200  |
| H | -2.12599000 | -3.22095400 | 5.19917600  |
| H | -2.37525700 | -2.25580700 | 6.65127900  |

|   |             |             |            |
|---|-------------|-------------|------------|
| H | -1.39440200 | 0.42878900  | 3.19370300 |
| H | -3.61387000 | -0.59314500 | 2.84620200 |
| H | -2.91652700 | -2.21830200 | 2.87179400 |
| H | -3.30176600 | -0.38795100 | 5.30320900 |
| H | -4.19341800 | -1.86877200 | 4.95037000 |
| H | -0.30217900 | -2.42651800 | 3.45593600 |

#### tBuI

|   |             |             |             |
|---|-------------|-------------|-------------|
| I | 1.02560300  | 0.00000500  | 0.00000100  |
| C | -1.25185800 | 0.00003100  | 0.00004000  |
| C | -1.69160900 | 0.57256000  | -1.34424700 |
| H | -1.33732300 | 1.59759400  | -1.48456700 |
| H | -1.33708900 | -0.03643200 | -2.18050500 |
| H | -2.79124800 | 0.58532800  | -1.37447800 |
| C | -1.69162100 | 0.87784400  | 1.16792700  |
| H | -1.33663400 | 0.48748600  | 2.12579600  |
| H | -1.33794800 | 1.90683800  | 1.05837100  |
| H | -2.79126100 | 0.89695400  | 1.19464700  |
| C | -1.69156300 | -1.45047000 | 0.17626000  |
| H | -1.33718100 | -2.08441400 | -0.64128800 |
| H | -1.33715800 | -1.87029300 | 1.12181300  |
| H | -2.79121000 | -1.48311800 | 0.18027500  |

#### TS1''

|    |             |             |             |
|----|-------------|-------------|-------------|
| Ni | 1.22215700  | 0.06518900  | 0.66782300  |
| C  | -4.74768100 | -5.13985700 | -0.07272600 |
| C  | -3.41374300 | -4.79508900 | -0.09890600 |
| C  | -2.94331900 | -3.65576700 | 0.60908500  |
| C  | -3.88098500 | -2.86782800 | 1.35134500  |
| C  | -5.24759300 | -3.24774400 | 1.35679200  |
| C  | -5.67354200 | -4.35946200 | 0.66197700  |
| H  | -0.86665600 | -3.88960900 | 0.05867000  |
| H  | -5.09411200 | -6.01556400 | -0.61509300 |
| H  | -2.70016300 | -5.39528400 | -0.65893000 |
| C  | -1.57644800 | -3.27604000 | 0.61046800  |
| C  | -3.39891800 | -1.72922100 | 2.05618100  |
| H  | -5.95667100 | -2.64424200 | 1.91841600  |
| H  | -6.72284800 | -4.64146200 | 0.67532800  |
| C  | -2.06811900 | -1.39499700 | 2.04495300  |
| C  | -1.11864600 | -2.17688600 | 1.32051300  |
| H  | -4.10916200 | -1.11974800 | 2.60981100  |
| H  | -1.73260600 | -0.51830100 | 2.59110900  |
| C  | 0.33016000  | -1.92900500 | 1.37336000  |
| H  | 0.93259500  | -2.57362500 | 0.73756200  |
| C  | 0.99290600  | -1.22221400 | 2.35556400  |
| H  | 0.44592900  | -0.73956200 | 3.16191900  |
| H  | 2.04083300  | -1.42856700 | 2.53872900  |
| C  | -6.06700800 | -1.00157200 | -2.08252900 |
| C  | -4.72795300 | -1.32387600 | -2.09402000 |
| C  | -3.75614400 | -0.41263100 | -1.59861800 |
| C  | -4.19371800 | 0.84996900  | -1.08224800 |
| C  | -5.58040400 | 1.15205400  | -1.08359700 |
| C  | -6.49810400 | 0.24851600  | -1.57440200 |
| H  | -2.04750200 | -1.66919200 | -2.00257500 |
| H  | -6.79955100 | -1.70859700 | -2.46226500 |
| H  | -4.39674400 | -2.28704600 | -2.47380800 |
| C  | -2.36920900 | -0.71155500 | -1.60131100 |
| C  | -3.21289400 | 1.75299900  | -0.58756400 |
| H  | -5.90753700 | 2.11278800  | -0.69220100 |
| H  | -7.55727700 | 0.49198300  | -1.57294900 |
| C  | -1.87726700 | 1.43622200  | -0.60986300 |
| C  | -1.42456000 | 0.18508700  | -1.12908300 |
| H  | -3.53622200 | 2.71190500  | -0.18866000 |

|   |             |             |             |
|---|-------------|-------------|-------------|
| H | -1.15638800 | 2.14950500  | -0.22401600 |
| C | 0.01087200  | -0.13859500 | -1.24674400 |
| H | 0.24656600  | -1.16409900 | -1.52193100 |
| C | 1.00464200  | 0.81044200  | -1.34119200 |
| H | 0.76181600  | 1.86779300  | -1.33594500 |
| H | 1.98401800  | 0.53469200  | -1.71531900 |
| C | 0.15068000  | 7.42794800  | -1.27795100 |
| C | 0.94749300  | 6.30752700  | -1.19351100 |
| C | 0.73126900  | 5.33696600  | -0.17785700 |
| C | -0.33148600 | 5.54414600  | 0.76014700  |
| C | -1.13454300 | 6.70836000  | 0.64667200  |
| C | -0.90005700 | 7.63106500  | -0.34991900 |
| H | 2.34449700  | 4.02815000  | -0.77179300 |
| H | 0.32605200  | 8.16233600  | -2.05929600 |
| H | 1.75461700  | 6.15020400  | -1.90501700 |
| C | 1.53252200  | 4.17155900  | -0.06145100 |
| C | -0.53700600 | 4.56647200  | 1.77353200  |
| H | -1.93972600 | 6.86176600  | 1.36149000  |
| H | -1.52087300 | 8.51939300  | -0.42724400 |
| C | 0.25857100  | 3.45043800  | 1.86013300  |
| C | 1.32430100  | 3.22869200  | 0.93454000  |
| H | -1.34175100 | 4.71740900  | 2.48946400  |
| H | 0.07216200  | 2.72458800  | 2.64589400  |
| C | 2.22222000  | 2.06237600  | 1.02488000  |
| H | 2.99992600  | 2.01194100  | 0.26679700  |
| C | 2.33320000  | 1.21764300  | 2.10795900  |
| H | 1.74508600  | 1.37040100  | 3.00810000  |
| H | 3.21030700  | 0.58849100  | 2.20480400  |
| I | 3.64834500  | -1.36607500 | -0.17476900 |
| C | 6.04173400  | -2.81448200 | -1.03668200 |
| C | 5.42058800  | -3.87028300 | -1.90545000 |
| H | 4.87477800  | -3.43452000 | -2.74860300 |
| H | 6.20549100  | -4.52639300 | -2.32731600 |
| H | 4.73316100  | -4.50898100 | -1.34131200 |
| C | 6.57992700  | -3.25987000 | 0.29266200  |
| H | 7.51336500  | -3.83708700 | 0.15116100  |
| H | 6.81940000  | -2.41021200 | 0.94028800  |
| H | 5.87432400  | -3.90927600 | 0.82097800  |
| C | 6.78637700  | -1.71314200 | -1.73520200 |
| H | 7.02312500  | -0.88741000 | -1.05635400 |
| H | 7.74566400  | -2.09532700 | -2.13296700 |
| H | 6.22071800  | -1.31275200 | -2.58281200 |

**CP5''**

|   |             |             |             |
|---|-------------|-------------|-------------|
| C | 4.66388200  | -1.02584500 | 0.30444200  |
| C | 3.39251600  | -1.51203600 | 0.08578800  |
| C | 2.29212200  | -0.62649400 | -0.09375100 |
| C | 2.53511300  | 0.78756200  | -0.04221400 |
| C | 3.84945100  | 1.25414500  | 0.18376600  |
| C | 4.89784900  | 0.36850600  | 0.35449600  |
| H | 0.80481300  | -2.16422700 | -0.35798200 |
| H | 5.49322300  | -1.71510700 | 0.43952400  |
| H | 3.21197000  | -2.58383700 | 0.04712600  |
| C | 0.97884900  | -1.09067100 | -0.31947100 |
| C | 1.42474000  | 1.67020500  | -0.22361300 |
| H | 4.02598200  | 2.32686400  | 0.22167500  |
| H | 5.90374800  | 0.74101000  | 0.52743500  |
| C | 0.16088600  | 1.19995600  | -0.44119300 |
| C | -0.11861500 | -0.21682000 | -0.49884600 |
| H | 1.60546600  | 2.74232900  | -0.18417600 |
| H | -0.65316800 | 1.90562100  | -0.57017100 |
| C | -1.40783000 | -0.74422800 | -0.72529900 |
| H | -1.48398400 | -1.83033700 | -0.74107000 |

|   |             |             |             |
|---|-------------|-------------|-------------|
| C | -2.67784100 | 0.01318800  | -0.95761400 |
| H | -2.46923900 | 1.06262900  | -1.19754200 |
| H | -3.17561700 | -0.40870500 | -1.84522000 |
| C | -3.72219400 | -0.01602500 | 0.20998500  |
| C | -3.13491000 | 0.65622100  | 1.46383300  |
| H | -2.23202700 | 0.13984700  | 1.80775500  |
| H | -2.86780900 | 1.70190700  | 1.26579300  |
| H | -3.86215300 | 0.64938400  | 2.28515400  |
| C | -4.12099800 | -1.46674000 | 0.53861200  |
| H | -4.89950900 | -1.48777100 | 1.31101600  |
| H | -4.51664700 | -1.98131100 | -0.34648000 |
| H | -3.26839600 | -2.04437700 | 0.91279100  |
| C | -4.97000600 | 0.76020500  | -0.25100900 |
| H | -5.41954700 | 0.30045400  | -1.14008300 |
| H | -5.73277300 | 0.77912300  | 0.53712600  |
| H | -4.72242200 | 1.79973300  | -0.50014200 |

**TS3''**

|    |             |             |             |
|----|-------------|-------------|-------------|
| Ni | -0.50114300 | -1.36330000 | 0.70383600  |
| C  | 6.28948600  | 0.57739800  | -1.08512700 |
| C  | 5.02781100  | 0.89694700  | -0.63481000 |
| C  | 4.27459900  | -0.03502600 | 0.13006900  |
| C  | 4.84649900  | -1.31488000 | 0.42644800  |
| C  | 6.14823400  | -1.61265800 | -0.05194000 |
| C  | 6.85470300  | -0.68797300 | -0.79101400 |
| H  | 2.54489800  | 1.23433900  | 0.37679200  |
| H  | 6.85754500  | 1.29562300  | -1.66997400 |
| H  | 4.58649700  | 1.86523000  | -0.85874700 |
| C  | 2.97463000  | 0.26231600  | 0.60791600  |
| C  | 4.08177400  | -2.23926200 | 1.19269900  |
| H  | 6.58038100  | -2.58483600 | 0.17263600  |
| H  | 7.85072300  | -0.92776200 | -1.15297200 |
| C  | 2.82505900  | -1.92286100 | 1.64392500  |
| C  | 2.24367900  | -0.65041900 | 1.35563600  |
| H  | 4.51160000  | -3.21198500 | 1.41891500  |
| H  | 2.26789800  | -2.65100700 | 2.22565200  |
| C  | 0.90298200  | -0.26412700 | 1.82198700  |
| H  | 0.62784500  | 0.76796300  | 1.60604500  |
| C  | 0.05413200  | -0.98952700 | 2.64809500  |
| H  | 0.34079600  | -1.93926100 | 3.09244800  |
| H  | -0.80174300 | -0.49490300 | 3.10104200  |
| I  | -1.32259000 | -2.92647500 | -1.04678800 |
| C  | 1.81307100  | 4.93426800  | 0.28872400  |
| C  | 0.75327200  | 4.32612000  | 0.92719100  |
| C  | -0.02142200 | 3.32837200  | 0.26863000  |
| C  | 0.32232700  | 2.97118800  | -1.07981400 |
| C  | 1.41477300  | 3.61341800  | -1.70636600 |
| C  | 2.14999500  | 4.57679300  | -1.03860600 |
| H  | -1.36213200 | 2.95594700  | 1.91694600  |
| H  | 2.39412300  | 5.69383300  | 0.80457100  |
| H  | 0.49366300  | 4.60144200  | 1.94674700  |
| C  | -1.10512900 | 2.67594500  | 0.89688900  |
| C  | -0.46065600 | 1.97012300  | -1.73563900 |
| H  | 1.66786900  | 3.33943900  | -2.72791400 |
| H  | 2.98386400  | 5.06653300  | -1.53378000 |
| C  | -1.50944400 | 1.35263600  | -1.11301500 |
| C  | -1.87352200 | 1.67894100  | 0.24860900  |
| H  | -0.20311900 | 1.69674000  | -2.75612300 |
| H  | -2.07074200 | 0.59259400  | -1.64421600 |
| C  | -2.93221500 | 1.04384000  | 0.94023700  |
| H  | -3.07868500 | 1.36298300  | 1.97191600  |
| C  | -3.94807800 | 0.08975800  | 0.39339600  |
| H  | -3.59653300 | -0.37459100 | -0.53338900 |

|   |             |             |             |
|---|-------------|-------------|-------------|
| H | -4.07683600 | -0.73354300 | 1.11157900  |
| C | -5.37160800 | 0.69547100  | 0.13023100  |
| C | -5.29477600 | 1.79024000  | -0.94905000 |
| H | -4.64916300 | 2.61903800  | -0.63749000 |
| H | -4.89882400 | 1.39177700  | -1.89126000 |
| H | -6.29125300 | 2.20026200  | -1.15460200 |
| C | -5.95928000 | 1.28424300  | 1.42638700  |
| H | -6.98338600 | 1.63899300  | 1.25824000  |
| H | -5.99558700 | 0.53199300  | 2.22478700  |
| H | -5.37220200 | 2.13577500  | 1.78928600  |
| C | -6.27798600 | -0.44765700 | -0.36384600 |
| H | -6.36356400 | -1.24149800 | 0.38827800  |
| H | -7.28845000 | -0.07817000 | -0.57799000 |
| H | -5.88368800 | -0.89912900 | -1.28211100 |

### CP6''

|    |             |             |             |
|----|-------------|-------------|-------------|
| Ni | -0.90721600 | -1.19882800 | -0.19827400 |
| I  | -1.28989700 | -2.36910000 | 2.01834000  |
| C  | 1.55738800  | 3.66528400  | 3.12119500  |
| C  | 0.62450000  | 2.69168500  | 2.83871300  |
| C  | 0.16620300  | 2.49291900  | 1.50777200  |
| C  | 0.69017200  | 3.31995700  | 0.46188800  |
| C  | 1.64618000  | 4.31433500  | 0.78498600  |
| C  | 2.07119900  | 4.48407700  | 2.08654700  |
| H  | -1.19906800 | 0.89063400  | 1.98957300  |
| H  | 1.90329300  | 3.80816100  | 4.14101300  |
| H  | 0.22792200  | 2.05854300  | 3.62816500  |
| C  | -0.80001400 | 1.50706000  | 1.18868400  |
| C  | 0.21957000  | 3.10872900  | -0.86641600 |
| H  | 2.04097600  | 4.94308300  | -0.00967300 |
| H  | 2.80543200  | 5.24939500  | 2.32272600  |
| C  | -0.70430100 | 2.13604200  | -1.15051400 |
| C  | -1.25185000 | 1.30387200  | -0.11817200 |
| H  | 0.60334200  | 3.74380800  | -1.66191500 |
| H  | -1.04851300 | 2.01398200  | -2.17229500 |
| C  | -2.22753200 | 0.22790500  | -0.37930900 |
| H  | -2.78231000 | -0.04093600 | 0.52082100  |
| C  | -3.12154700 | 0.21776900  | -1.60614000 |
| H  | -2.56628100 | 0.51563400  | -2.50495900 |
| H  | -3.44600200 | -0.81632600 | -1.77300600 |
| C  | -4.43400600 | 1.07133200  | -1.52935000 |
| C  | 5.94190900  | 0.74097400  | -1.17480800 |
| C  | 4.62320300  | 0.83111800  | -1.55934800 |
| C  | 3.73656400  | -0.26632600 | -1.37887500 |
| C  | 4.23894300  | -1.47184600 | -0.78755300 |
| C  | 5.60330600  | -1.53235800 | -0.40190900 |
| C  | 6.43701400  | -0.45169700 | -0.59074100 |
| H  | 1.99809700  | 0.71275200  | -2.20344400 |
| H  | 6.60986400  | 1.58610500  | -1.31702700 |
| H  | 4.23968800  | 1.74544500  | -2.00578700 |
| C  | 2.37585700  | -0.20764000 | -1.76446300 |
| C  | 3.34581100  | -2.56419200 | -0.61310200 |
| H  | 5.98044700  | -2.44780700 | 0.04754000  |
| H  | 7.47973500  | -0.50960000 | -0.29085500 |
| C  | 2.03153600  | -2.48081600 | -1.00140500 |
| C  | 1.51528400  | -1.28529500 | -1.59256900 |
| H  | 3.72066300  | -3.48028100 | -0.16350400 |
| H  | 1.38018100  | -3.33566800 | -0.85275600 |
| C  | 0.11057300  | -1.15654900 | -2.01332000 |
| H  | -0.12690700 | -0.24185300 | -2.54916800 |
| C  | -0.85016000 | -2.16679500 | -1.97423500 |
| H  | -0.60224600 | -3.18802300 | -1.69560600 |
| H  | -1.78089700 | -2.04921700 | -2.51739800 |

|   |             |             |             |
|---|-------------|-------------|-------------|
| C | -5.33089900 | 0.57733400  | -0.37754800 |
| H | -5.53525400 | -0.49722300 | -0.46251200 |
| H | -4.87760700 | 0.75544500  | 0.60384100  |
| H | -6.29384200 | 1.10226400  | -0.39188100 |
| C | -5.17994000 | 0.86815200  | -2.86388700 |
| H | -5.42420500 | -0.18877200 | -3.02806900 |
| H | -6.11997700 | 1.43310300  | -2.87327500 |
| H | -4.57728900 | 1.21051700  | -3.71480500 |
| C | -4.13946800 | 2.57102700  | -1.34417800 |
| H | -3.62651400 | 2.77385800  | -0.39837600 |
| H | -3.51380800 | 2.96251100  | -2.15567700 |
| H | -5.07531700 | 3.14360000  | -1.34368300 |

### CP7''

|    |             |             |             |
|----|-------------|-------------|-------------|
| Ni | 0.82406700  | -0.07060600 | -0.90882700 |
| I  | 0.56244200  | -2.44610200 | -1.81768400 |
| C  | 1.60090000  | 5.21094700  | -1.42389600 |
| C  | 1.99145300  | 3.88414100  | -1.48549600 |
| C  | 1.71193500  | 2.99950900  | -0.41949000 |
| C  | 1.02955600  | 3.49497700  | 0.73131900  |
| C  | 0.64170700  | 4.85261400  | 0.76984600  |
| C  | 0.92037700  | 5.69800000  | -0.29039500 |
| H  | 2.80976000  | 1.31455300  | -1.22950300 |
| H  | 1.82236200  | 5.88043300  | -2.25019300 |
| H  | 2.52485500  | 3.50921500  | -2.35599900 |
| C  | 2.11064900  | 1.61794000  | -0.45036900 |
| C  | 0.77077700  | 2.59163300  | 1.81987400  |
| H  | 0.12223500  | 5.22740100  | 1.64855700  |
| H  | 0.61750200  | 6.74036100  | -0.24862600 |
| C  | 1.16673100  | 1.28778300  | 1.78957800  |
| C  | 1.91158100  | 0.75883600  | 0.66563300  |
| H  | 0.24641700  | 2.97705600  | 2.69153300  |
| H  | 0.95705300  | 0.63758000  | 2.63104800  |
| C  | 2.23715600  | -0.62190400 | 0.45835100  |
| H  | 3.06180700  | -0.79810900 | -0.23244800 |
| C  | 2.03166800  | -1.71281800 | 1.48404000  |
| H  | 1.17246700  | -1.47789200 | 2.12505400  |
| H  | 1.76233300  | -2.62832900 | 0.94747800  |
| C  | 3.26044500  | -2.04404600 | 2.39207100  |
| C  | -5.67532900 | 0.25568700  | 2.58840200  |
| C  | -4.52577700 | 0.82773900  | 2.09036500  |
| C  | -3.93726400 | 0.34850200  | 0.88830600  |
| C  | -4.55970900 | -0.74172200 | 0.19758100  |
| C  | -5.74295400 | -1.30904000 | 0.73662200  |
| C  | -6.28913700 | -0.82292700 | 1.90529900  |
| H  | -2.28635500 | 1.74149100  | 0.87316200  |
| H  | -6.11640100 | 0.62976600  | 3.50827400  |
| H  | -4.05168000 | 1.65640200  | 2.61147100  |
| C  | -2.75618500 | 0.91325700  | 0.34667700  |
| C  | -3.96460400 | -1.21106300 | -1.00726700 |
| H  | -6.21285100 | -2.13733100 | 0.21178700  |
| H  | -7.19537800 | -1.26696000 | 2.30813100  |
| C  | -2.82051700 | -0.64337500 | -1.50747200 |
| C  | -2.18797200 | 0.44219200  | -0.82914000 |
| H  | -4.43285100 | -2.03975500 | -1.53257200 |
| H  | -2.38280800 | -1.03261500 | -2.41914900 |
| C  | -0.98739800 | 1.11670800  | -1.34362100 |
| H  | -0.72148200 | 2.02212400  | -0.80266500 |
| C  | -0.29394500 | 0.83853200  | -2.49972100 |
| H  | -0.59582600 | 0.05688800  | -3.18606100 |
| H  | 0.42864300  | 1.55719400  | -2.87608900 |
| C  | 3.67561200  | -0.83365900 | 3.24844500  |
| H  | 3.97363700  | 0.02017800  | 2.62918900  |



|   |            |             |            |
|---|------------|-------------|------------|
| H | 2.85726900 | -0.50690500 | 3.90265300 |
| H | 4.52719500 | -1.08933200 | 3.89111100 |
| C | 4.45733300 | -2.50248600 | 1.53595600 |
| H | 5.28389400 | -2.83336500 | 2.17675600 |
| H | 4.18117200 | -3.33983900 | 0.88396800 |
| H | 4.84049600 | -1.69492800 | 0.90147800 |
| C | 2.84210600 | -3.19924400 | 3.32319300 |
| H | 2.55510300 | -4.08767600 | 2.74807900 |
| H | 3.66594100 | -3.48190800 | 3.99017800 |
| H | 1.98702200 | -2.91561100 | 3.94964100 |

**TS4-t''**

|    |             |             |             |
|----|-------------|-------------|-------------|
| Ni | 0.82565300  | -0.61401100 | -0.41111300 |
| C  | -4.42455900 | 4.96076400  | 0.21992100  |
| C  | -3.11192700 | 4.54495200  | 0.18145700  |
| C  | -2.73956100 | 3.37712400  | -0.53940000 |
| C  | -3.75397800 | 2.63727900  | -1.23053900 |
| C  | -5.09730300 | 3.09194100  | -1.17105400 |
| C  | -5.42712400 | 4.22772500  | -0.46189600 |
| H  | -0.62920100 | 3.49448600  | -0.08759600 |
| H  | -4.69623700 | 5.85521800  | 0.77377500  |
| H  | -2.34038500 | 5.10711200  | 0.70256200  |
| C  | -1.39825000 | 2.91897600  | -0.60027100 |
| C  | -3.37283900 | 1.46565800  | -1.94351000 |
| H  | -5.86397500 | 2.52791800  | -1.69682000 |
| H  | -6.45867600 | 4.56724300  | -0.42606200 |
| C  | -2.06640400 | 1.04757500  | -1.98574300 |
| C  | -1.04281100 | 1.78326800  | -1.31401500 |
| H  | -4.14196500 | 0.89091000  | -2.45331100 |
| H  | -1.81115900 | 0.13458900  | -2.51396500 |
| C  | 0.37874100  | 1.40955700  | -1.39419300 |
| H  | 1.05258700  | 2.02651000  | -0.79813600 |
| C  | 0.94248700  | 0.53700600  | -2.29066300 |
| H  | 0.35228900  | -0.00424600 | -3.02058900 |
| H  | 2.01462700  | 0.52301200  | -2.44379300 |
| C  | -7.01687200 | -0.61755700 | 1.24957900  |
| C  | -5.78366600 | -0.00471400 | 1.27966400  |
| C  | -4.59260800 | -0.77729600 | 1.36191200  |
| C  | -4.69150500 | -2.20609800 | 1.41063800  |
| C  | -5.97674100 | -2.80536900 | 1.37740300  |
| C  | -7.11408500 | -2.02998700 | 1.29946800  |
| H  | -3.23762400 | 0.90335400  | 1.36131400  |
| H  | -7.92171000 | -0.01907000 | 1.18681500  |
| H  | -5.70329700 | 1.07860000  | 1.23473500  |
| C  | -3.30845500 | -0.18107700 | 1.39857100  |
| C  | -3.49251200 | -2.96991200 | 1.48823000  |
| H  | -6.05048600 | -3.88965000 | 1.41252000  |
| H  | -8.09274300 | -2.50171700 | 1.27427200  |
| C  | -2.26257400 | -2.36500000 | 1.52250600  |
| C  | -2.14914200 | -0.94140200 | 1.48299600  |
| H  | -3.56479300 | -4.05434000 | 1.51145300  |
| H  | -1.36694900 | -2.97414100 | 1.56004000  |
| C  | -0.86905700 | -0.24585900 | 1.58514000  |
| H  | -0.94289700 | 0.84021400  | 1.55677600  |
| C  | 0.36880500  | -0.78657700 | 1.78425600  |
| H  | 0.51775200  | -1.85069900 | 1.93990100  |
| H  | 1.18979900  | -0.13133000 | 2.06120300  |
| I  | -0.01221100 | -2.81629900 | -1.59976900 |
| C  | 4.97135400  | 4.95994000  | -0.46977900 |
| C  | 4.60246700  | 3.71771400  | -0.93839400 |
| C  | 4.27586500  | 2.66588000  | -0.03612400 |
| C  | 4.34535500  | 2.92382100  | 1.37357100  |
| C  | 4.72786400  | 4.20964200  | 1.82286000  |

|   |            |             |             |
|---|------------|-------------|-------------|
| C | 5.03453500 | 5.21089100  | 0.92204800  |
| H | 3.87667700 | 1.19488300  | -1.55459600 |
| H | 5.21723800 | 5.75345100  | -1.17013700 |
| H | 4.55539500 | 3.52405700  | -2.00746400 |
| C | 3.89188800 | 1.38091100  | -0.48315600 |
| C | 4.03429400 | 1.85576500  | 2.26684400  |
| H | 4.77910600 | 4.39810500  | 2.89277400  |
| H | 5.32790000 | 6.19411300  | 1.27904600  |
| C | 3.66509500 | 0.61984500  | 1.80745000  |
| C | 3.56357700 | 0.33327800  | 0.39773100  |
| H | 4.10603400 | 2.03648600  | 3.33712300  |
| H | 3.45887700 | -0.16840700 | 2.52353200  |
| C | 3.14816400 | -0.95297800 | -0.10900800 |
| H | 3.23461800 | -1.06536600 | -1.18847900 |
| C | 3.27349000 | -2.24651000 | 0.66099000  |
| H | 3.10478800 | -2.08371500 | 1.73260500  |
| H | 2.48841700 | -2.93121100 | 0.32082400  |
| C | 4.63719900 | -3.00958400 | 0.50347500  |
| C | 4.88915000 | -3.36529800 | -0.97420500 |
| H | 5.78391400 | -3.99278300 | -1.06940200 |
| H | 4.04275200 | -3.91640900 | -1.40070300 |
| H | 5.05149700 | -2.47082500 | -1.58643100 |
| C | 4.52086100 | -4.31238400 | 1.31929100  |
| H | 3.70031400 | -4.93959200 | 0.95075600  |
| H | 5.44668700 | -4.89701000 | 1.25258900  |
| H | 4.33498000 | -4.10301100 | 2.38050600  |
| C | 5.81313400 | -2.17754100 | 1.04503900  |
| H | 5.93959700 | -1.24184400 | 0.49002700  |
| H | 5.67048100 | -1.92308200 | 2.10283000  |
| H | 6.75059100 | -2.74187600 | 0.96386900  |

**CP8-t''**

|    |             |             |             |
|----|-------------|-------------|-------------|
| Ni | 0.02959000  | -0.88849300 | 0.58985100  |
| C  | -1.92802500 | 6.58611900  | -1.79034100 |
| C  | -2.31110200 | 5.31688100  | -1.41649700 |
| C  | -1.63157000 | 4.63134400  | -0.37341000 |
| C  | -0.53903100 | 5.28237900  | 0.28633600  |
| C  | -0.16950100 | 6.58977800  | -0.12114300 |
| C  | -0.84784600 | 7.22843900  | -1.13722200 |
| H  | -2.83236900 | 2.83509400  | -0.46339900 |
| H  | -2.45488500 | 7.10073700  | -2.58908000 |
| H  | -3.14081700 | 4.82156800  | -1.91504500 |
| C  | -1.99888900 | 3.32435000  | 0.03710100  |
| C  | 0.13146100  | 4.58890300  | 1.33394500  |
| H  | 0.65923400  | 7.08185200  | 0.38233100  |
| H  | -0.55578900 | 8.22983300  | -1.44108500 |
| C  | -0.24823700 | 3.32438300  | 1.70946400  |
| C  | -1.33190600 | 2.65853400  | 1.05597000  |
| H  | 0.95296400  | 5.08501600  | 1.84550900  |
| H  | 0.27162800  | 2.82875700  | 2.52376400  |
| C  | -1.77337700 | 1.31045300  | 1.42897500  |
| H  | -2.66661400 | 0.96043500  | 0.91465500  |
| C  | -1.20628700 | 0.48161600  | 2.33505100  |
| H  | -0.33820700 | 0.74927800  | 2.92931300  |
| H  | -1.68868600 | -0.45626900 | 2.59355600  |
| C  | 7.49867000  | 1.42145200  | 0.01492900  |
| C  | 6.16655900  | 1.70795000  | 0.21548300  |
| C  | 5.15578800  | 0.95416900  | -0.44021600 |
| C  | 5.54213700  | -0.11225300 | -1.31559600 |
| C  | 6.92157800  | -0.38192300 | -1.50118300 |
| C  | 7.87924900  | 0.36755600  | -0.85116500 |
| H  | 3.48702000  | 2.02780800  | 0.41250800  |
| H  | 8.26361300  | 2.00215800  | 0.52284300  |

|   |             |             |             |
|---|-------------|-------------|-------------|
| H | 5.86950800  | 2.51389400  | 0.88219000  |
| C | 3.77704700  | 1.22040800  | -0.25642600 |
| C | 4.52142800  | -0.86305900 | -1.96601400 |
| H | 7.21323200  | -1.19312300 | -2.16383500 |
| H | 8.93329100  | 0.14990800  | -1.00015700 |
| C | 3.19494300  | -0.57891000 | -1.77054500 |
| C | 2.79515400  | 0.48251900  | -0.90220300 |
| H | 4.81286100  | -1.67692300 | -2.62535300 |
| H | 2.44079400  | -1.17480800 | -2.27459200 |
| C | 1.39651600  | 0.85159500  | -0.69554300 |
| H | 1.23845000  | 1.68895200  | -0.01680100 |
| C | 0.29342200  | 0.31671000  | -1.30058800 |
| H | 0.37759900  | -0.43810400 | -2.07517600 |
| H | -0.66691700 | 0.81494900  | -1.21340700 |
| I | 1.80017200  | -1.93206600 | 2.16021700  |
| C | -6.94821900 | -0.45734700 | 1.22173300  |
| C | -5.73492500 | -1.07863000 | 1.41977000  |
| C | -4.74400800 | -1.08888700 | 0.39770300  |
| C | -5.03798100 | -0.43986700 | -0.84737800 |
| C | -6.29632600 | 0.19014100  | -1.01998000 |
| C | -7.23402900 | 0.18428000  | -0.00864300 |
| H | -3.28589100 | -2.22293300 | 1.51111400  |
| H | -7.69410900 | -0.45849500 | 2.01206500  |
| H | -5.51724800 | -1.57269400 | 2.36391700  |
| C | -3.48629400 | -1.71870800 | 0.56690100  |
| C | -4.04311300 | -0.46743200 | -1.86568200 |
| H | -6.51250000 | 0.67747800  | -1.96830200 |
| H | -8.19562200 | 0.66922200  | -0.15246600 |
| C | -2.83357700 | -1.08642000 | -1.66916400 |
| C | -2.50694100 | -1.73386700 | -0.43048400 |
| H | -4.26125100 | 0.00772300  | -2.82008300 |
| H | -2.10788100 | -1.09246400 | -2.47629800 |
| C | -1.19332300 | -2.35087000 | -0.17966200 |
| H | -1.21197100 | -2.93668800 | 0.74600900  |
| C | -0.45076500 | -3.09441600 | -1.28902500 |
| H | -0.52359400 | -2.53935600 | -2.23440100 |
| H | 0.61784700  | -3.12361700 | -1.03483300 |
| C | -0.87678000 | -4.57253800 | -1.57909100 |
| C | -2.34490500 | -4.65984400 | -2.03419800 |
| H | -3.03341500 | -4.32288200 | -1.25279600 |
| H | -2.52566700 | -4.04543200 | -2.92513000 |
| H | -2.60651200 | -5.69548800 | -2.28599300 |
| C | -0.66959600 | -5.45135800 | -0.33067100 |
| H | -0.87877500 | -6.50316200 | -0.56242200 |
| H | 0.36154900  | -5.38511100 | 0.03676100  |
| H | -1.33506100 | -5.15844400 | 0.48887600  |
| C | 0.03076200  | -5.09601500 | -2.71085400 |
| H | 1.08830600  | -5.06171400 | -2.42044700 |
| H | -0.21341300 | -6.13619300 | -2.95961300 |
| H | -0.08733200 | -4.49917000 | -3.62463600 |

**TS5''**

|    |            |             |             |
|----|------------|-------------|-------------|
| Ni | 0.00374300 | -1.54018200 | 0.05553900  |
| C  | 6.38759000 | 2.50141900  | 1.12729700  |
| C  | 5.70095000 | 1.31426400  | 1.25628400  |
| C  | 4.69494500 | 0.95207000  | 0.32008400  |
| C  | 4.40517000 | 1.84289700  | -0.76381900 |
| C  | 5.12963900 | 3.05806600  | -0.86868900 |
| C  | 6.09977300 | 3.38156200  | 0.05555700  |
| H  | 4.20116300 | -0.93825800 | 1.24176400  |
| H  | 7.15474200 | 2.76747000  | 1.84922000  |
| H  | 5.92081900 | 0.63685400  | 2.07810400  |
| C  | 3.96761600 | -0.26171200 | 0.42134800  |

|   |             |             |             |
|---|-------------|-------------|-------------|
| C | 3.39597300  | 1.46996900  | -1.69621900 |
| H | 4.90701500  | 3.73173700  | -1.69272000 |
| H | 6.64870900  | 4.31474800  | -0.03510500 |
| C | 2.71215200  | 0.28581100  | -1.57428500 |
| C | 2.99261900  | -0.61476200 | -0.49998900 |
| H | 3.17093000  | 2.14387100  | -2.51947400 |
| H | 1.94271800  | 0.03501000  | -2.29779800 |
| C | 2.29833000  | -1.90282100 | -0.35113900 |
| H | 2.58514900  | -2.47948600 | 0.52612200  |
| C | 1.47083700  | -2.49379300 | -1.26858500 |
| H | 1.25897300  | -2.04825200 | -2.23396900 |
| H | 1.16711300  | -3.52708200 | -1.15189700 |
| C | -4.01510800 | 4.90609300  | -0.64567600 |
| C | -2.82986300 | 4.20460100  | -0.65744200 |
| C | -2.64186000 | 3.08147400  | 0.19293200  |
| C | -3.70740300 | 2.68757100  | 1.06550600  |
| C | -4.91527900 | 3.43058300  | 1.05463400  |
| C | -5.06738200 | 4.51600800  | 0.21834300  |
| H | -0.63103600 | 2.64083400  | -0.45966700 |
| H | -4.14824600 | 5.76175900  | -1.30200400 |
| H | -2.02097600 | 4.49916100  | -1.32181700 |
| C | -1.43517400 | 2.33941500  | 0.20825600  |
| C | -3.50822200 | 1.56118200  | 1.01258000  |
| H | -5.72315800 | 3.12789800  | 1.71670200  |
| H | -5.99835100 | 5.07640600  | 0.21770100  |
| C | -2.32715700 | 0.86448300  | 1.90416400  |
| C | -1.25535200 | 1.24627900  | 1.04200300  |
| H | -4.31577900 | 1.25641100  | 2.57396700  |
| H | -2.20928400 | 0.00905700  | 2.56166700  |
| C | 0.04403800  | 0.56420100  | 1.03751700  |
| H | 0.79214000  | 1.02287200  | 0.39291400  |
| C | 0.46417100  | -0.45058800 | 1.87012800  |
| H | -0.17681800 | -0.83437400 | 2.65836200  |
| H | 1.52445300  | -0.65076000 | 1.97726400  |
| I | -1.94192300 | -1.52615400 | -1.65811900 |
| C | -0.57186300 | -3.81830800 | 1.35237500  |
| C | 0.62638000  | -4.02771500 | 2.24041700  |
| H | 0.81922700  | -3.17103500 | 2.89474900  |
| H | 0.46034400  | -4.90081900 | 2.89846600  |
| H | 1.53483500  | -4.24313700 | 1.66582800  |
| C | -0.78673100 | -4.84421900 | 0.27112600  |
| H | -1.47619600 | -4.48549200 | -0.49885600 |
| H | 0.14944200  | -5.15081600 | -0.20886500 |
| H | -1.22656300 | -5.75786300 | 0.71126200  |
| C | -1.82859200 | -3.32401700 | 2.01991000  |
| H | -2.30057900 | -4.15309900 | 2.57917700  |
| H | -1.63378100 | -2.52755800 | 2.74584700  |
| H | -2.56107600 | -2.96485400 | 1.29058500  |

**TS6-t''**

|    |             |             |             |
|----|-------------|-------------|-------------|
| Ni | -0.14415300 | -1.45440500 | -0.03763100 |
| C  | 6.57681500  | 2.14557700  | 1.15358200  |
| C  | 5.82122800  | 0.99389500  | 1.13618400  |
| C  | 4.77898500  | 0.82422700  | 0.18520400  |
| C  | 4.52578200  | 1.87153800  | -0.75874200 |
| C  | 5.32139800  | 3.04500400  | -0.71511100 |
| C  | 6.32505200  | 3.18049000  | 0.22009600  |
| H  | 4.18559400  | -1.14303300 | 0.85196700  |
| H  | 7.37101100  | 2.26427700  | 1.88539300  |
| H  | 6.01316000  | 0.19782900  | 1.85169400  |
| C  | 3.98029300  | -0.34727700 | 0.13796500  |
| C  | 3.48159600  | 1.68915900  | -1.70937400 |
| H  | 5.12668300  | 3.83789300  | -1.43328100 |

|   |             |             |             |
|---|-------------|-------------|-------------|
| H | 6.92829400  | 4.08373200  | 0.24428300  |
| C | 2.72806400  | 0.54207900  | -1.73163300 |
| C | 2.96674800  | -0.51127700 | -0.79500600 |
| H | 3.28935100  | 2.47930900  | -2.43134200 |
| H | 1.94284900  | 0.43257400  | -2.47320000 |
| C | 2.20036700  | -1.76501900 | -0.80455400 |
| H | 2.51510800  | -2.49726000 | -0.06293900 |
| C | 1.24082800  | -2.13647200 | -1.69878300 |
| H | 0.94005600  | -1.51063300 | -2.53229000 |
| H | 0.86441100  | -3.15293300 | -1.71668300 |
| C | -3.95081400 | 5.03649900  | -0.60055400 |
| C | -2.78293600 | 4.30970300  | -0.66999400 |
| C | -2.58197700 | 3.17626000  | 0.16358500  |
| C | -3.61562600 | 2.79903400  | 1.08086400  |
| C | -4.80634200 | 3.56796100  | 1.12865300  |
| C | -4.97182300 | 4.66252900  | 0.30703700  |
| H | -0.61191600 | 2.69714500  | -0.58033700 |
| H | -4.09427100 | 5.89994000  | -1.24439200 |
| H | -1.99800300 | 4.59237300  | -1.36754200 |
| C | -1.39297300 | 2.40710400  | 0.11954400  |
| C | -3.40427100 | 1.66216200  | 1.91077400  |
| H | -5.59032700 | 3.27764900  | 1.82405500  |
| H | -5.88946100 | 5.24274600  | 0.35161500  |
| C | -2.24109100 | 0.93903500  | 1.84472200  |
| C | -1.20110200 | 1.30440200  | 0.93771900  |
| H | -4.18911900 | 1.36867900  | 2.60367500  |
| H | -2.11548900 | 0.07267400  | 2.48641100  |
| C | 0.08087000  | 0.59000900  | 0.86756000  |
| H | 0.80352400  | 1.02676300  | 0.18020300  |
| C | 0.52624900  | -0.41412400 | 1.70266400  |
| H | -0.07692200 | -0.76500800 | 2.53492100  |
| H | 1.58343800  | -0.65221900 | 1.74331500  |
| I | -2.29504200 | -1.75560800 | -1.43555300 |
| C | -0.23782900 | -3.74641300 | 1.49278000  |
| C | 0.98602000  | -3.74874900 | 2.36981900  |
| H | 1.00186500  | -4.65815300 | 2.99904900  |
| H | 1.91571500  | -3.76000400 | 1.78811800  |
| H | 1.01443900  | -2.89383000 | 3.05372700  |
| C | -0.26077800 | -4.77382700 | 0.39218700  |
| H | 0.69898300  | -4.83821000 | -0.13489800 |
| H | -0.45038300 | -5.77754200 | 0.81724100  |
| H | -1.05216800 | -4.57466500 | -0.33683900 |
| C | -1.55193600 | -3.49436800 | 2.18342300  |
| H | -1.83723400 | -4.37661900 | 2.78703600  |
| H | -1.50079400 | -2.64640500 | 2.87689400  |
| H | -2.35964900 | -3.31136300 | 1.46846300  |

**CP9-t''**

|    |             |             |             |
|----|-------------|-------------|-------------|
| Ni | 2.28408400  | -0.59021500 | -0.18870000 |
| C  | -5.20041300 | -3.66486500 | -0.82321300 |
| C  | -3.84656800 | -3.86206500 | -0.98306000 |
| C  | -2.91407400 | -3.23825200 | -0.11021200 |
| C  | -3.40397700 | -2.39977400 | 0.94393600  |
| C  | -4.80442100 | -2.21721100 | 1.08172500  |
| C  | -5.68380300 | -2.83499100 | 0.21788800  |
| H  | -1.14607100 | -4.06012000 | -1.04263400 |
| H  | -5.90398300 | -4.14681200 | -1.49626600 |
| H  | -3.47273500 | -4.49944300 | -1.78088200 |
| C  | -1.51320900 | -3.41559000 | -0.24579400 |
| C  | -2.46188000 | -1.77761500 | 1.81193500  |
| H  | -5.17373600 | -1.58339000 | 1.88441200  |
| H  | -6.75407900 | -2.68867400 | 0.33423700  |
| C  | -1.11262100 | -1.96946800 | 1.65692100  |

|   |             |             |             |
|---|-------------|-------------|-------------|
| C | -0.60861200 | -2.80609900 | 0.61359800  |
| H | -2.82958400 | -1.13364900 | 2.60682600  |
| H | -0.42118100 | -1.46652500 | 2.32479400  |
| C | 0.82390500  | -3.05131600 | 0.42622900  |
| H | 1.07598900  | -3.67265000 | -0.43311200 |
| C | 1.83963000  | -2.61354000 | 1.20756200  |
| H | 1.67784100  | -2.04251400 | 2.11642400  |
| H | 2.85479200  | -2.94963600 | 1.02470900  |
| C | -2.62641900 | 5.66106100  | -0.25807800 |
| C | -1.53311100 | 4.95821600  | -0.71318200 |
| C | -1.58178000 | 3.54328300  | -0.83939100 |
| C | -2.78649700 | 2.85413800  | -0.48265000 |
| C | -3.89538700 | 3.60722000  | -0.01965100 |
| C | -3.81812900 | 4.97939200  | 0.09047100  |
| H | 0.43802500  | 3.31601000  | -1.56900100 |
| H | -2.57837400 | 6.74219800  | -0.16278000 |
| H | -0.61470900 | 5.47598600  | -0.97845100 |
| C | -0.47759300 | 2.79060100  | -1.30779100 |
| C | -2.82303500 | 1.43632200  | -0.60970500 |
| H | -4.80970900 | 3.08366300  | 0.24942300  |
| H | -4.67416500 | 5.54500300  | 0.44831500  |
| C | -1.73613300 | 0.73434400  | -1.06360400 |
| C | -0.52974500 | 1.40852800  | -1.42417600 |
| H | -3.73523600 | 0.90889100  | -0.34165400 |
| H | -1.79931500 | -0.34473800 | -1.15499200 |
| C | 0.63798000  | 0.70662400  | -1.95163500 |
| H | 1.43816700  | 1.35623400  | -2.30479400 |
| C | 0.81899300  | -0.63658400 | -2.07975700 |
| H | 0.04571700  | -1.34689100 | -1.80305500 |
| H | 1.64602800  | -1.01893900 | -2.66600500 |
| I | 2.27958900  | 1.34707500  | 1.54113300  |
| C | 4.01562400  | -1.11251200 | -1.10766800 |
| C | 3.92743000  | -2.46632700 | -1.81541200 |
| H | 3.68458800  | -3.28404700 | -1.12415200 |
| H | 3.18185600  | -2.48007700 | -2.62096700 |
| H | 4.89480800  | -2.72600000 | -2.28041400 |
| C | 4.34039900  | 0.00622800  | -2.10152400 |
| H | 5.32808000  | -0.15979200 | -2.56765000 |
| H | 3.61461600  | 0.06446500  | -2.92388100 |
| H | 4.37712100  | 0.98676800  | -1.61148400 |
| C | 5.08120900  | -1.15703700 | -0.00563600 |
| H | 6.07263900  | -1.38024100 | -0.43936600 |
| H | 5.16082200  | -0.20315100 | 0.52620700  |
| H | 4.88260700  | -1.93715900 | 0.74096400  |

**CP10''**

|    |             |             |             |
|----|-------------|-------------|-------------|
| Ni | -1.44226000 | 0.41782600  | 0.27873900  |
| I  | -1.93580700 | -1.99266500 | -0.31941400 |
| C  | -2.60975400 | 1.77477500  | -0.47555700 |
| C  | 5.66272600  | 0.62950600  | -1.29224800 |
| C  | 4.47633200  | 1.28926200  | -1.06300100 |
| C  | 3.49199000  | 0.73344700  | -0.20026300 |
| C  | 3.75366000  | -0.52684800 | 0.43075100  |
| C  | 4.98607700  | -1.18081400 | 0.17350400  |
| C  | 5.91980900  | -0.61673500 | -0.66869900 |
| H  | 2.06872900  | 2.34125300  | -0.42111300 |
| H  | 6.40761300  | 1.06221500  | -1.95425600 |
| H  | 4.27517300  | 2.24521100  | -1.54071200 |
| C  | 2.26103300  | 1.38294000  | 0.05785000  |
| C  | 2.76422600  | -1.07274600 | 1.29487500  |
| H  | 5.18144000  | -2.13762800 | 0.65138000  |
| H  | 6.85952200  | -1.12773400 | -0.85905900 |
| C  | 1.58118700  | -0.41825300 | 1.52914200  |

|   |             |             |             |
|---|-------------|-------------|-------------|
| C | 1.30499700  | 0.83774900  | 0.90622200  |
| H | 2.95780200  | -2.02986300 | 1.77241400  |
| H | 0.84581800  | -0.86833000 | 2.18753400  |
| C | 0.05547400  | 1.57944000  | 1.12852800  |
| H | 0.03614300  | 2.56995600  | 0.68490700  |
| C | -0.96324400 | 1.24626900  | 2.02614900  |
| H | -0.87346200 | 0.39854700  | 2.70236800  |
| H | -1.69806600 | 1.99053700  | 2.31352900  |
| C | -3.98440300 | 1.39220000  | 0.06984800  |
| H | -4.22112600 | 0.33968700  | -0.10347600 |
| H | -4.06874300 | 1.59407100  | 1.14360700  |
| H | -4.75477000 | 1.99862700  | -0.43636600 |
| C | -2.29080400 | 3.24225200  | -0.20554800 |
| H | -1.33782900 | 3.55130200  | -0.64785600 |
| H | -3.07115800 | 3.86524800  | -0.66914900 |
| H | -2.28256800 | 3.49317800  | 0.86018200  |
| C | -2.43471000 | 1.45010200  | -1.96203400 |
| H | -2.78129400 | 0.44686400  | -2.21712600 |
| H | -3.01894400 | 2.17527400  | -2.55403000 |
| H | -1.39079400 | 1.54841300  | -2.28565300 |

### TS15'

|    |             |             |             |
|----|-------------|-------------|-------------|
| Ni | 0.41621800  | -0.52783000 | 0.97167900  |
| I  | 0.89173500  | -0.63480600 | 3.55245000  |
| C  | -2.28289100 | 0.08327000  | 0.09973100  |
| C  | -1.31611600 | 1.96594900  | 1.03039200  |
| C  | -2.45999100 | 2.72635900  | 0.80185800  |
| C  | -3.57782400 | 2.14341400  | 0.19174100  |
| C  | -3.45909300 | 0.79003700  | -0.15663300 |
| C  | -2.08919400 | -1.35078600 | -0.22757400 |
| C  | -0.62147800 | -3.13749000 | -0.18295800 |
| C  | -1.56947000 | -4.00088600 | -0.72315000 |
| C  | -2.84855100 | -3.52219100 | -1.03618400 |
| C  | -3.08407100 | -2.16604600 | -0.77111400 |
| H  | -0.44110700 | 2.39564400  | 1.50771800  |
| H  | -2.45881900 | 3.76536600  | 1.10718000  |
| H  | -4.29206500 | 0.28522500  | -0.63187500 |
| H  | 0.37059800  | -3.49389800 | 0.07814500  |
| H  | -1.29582700 | -5.03610600 | -0.88529900 |
| H  | -4.05869700 | -1.74213700 | -0.98159400 |
| N  | -0.85826200 | -1.84278700 | 0.05974600  |
| N  | -1.21823000 | 0.67658700  | 0.68833400  |
| C  | -4.87905300 | 2.90851600  | -0.09524900 |
| C  | -3.95896400 | -4.40336900 | -1.62839300 |
| C  | -4.80119900 | 4.37651300  | 0.36503000  |
| H  | -5.74710100 | 4.88166500  | 0.14118400  |
| H  | -4.63196300 | 4.45726300  | 1.44463400  |
| H  | -4.00448600 | 4.92464300  | -0.15040300 |
| C  | -6.04872700 | 2.22425100  | 0.65248800  |
| H  | -6.98525300 | 2.75927200  | 0.45574000  |
| H  | -6.18685800 | 1.18518200  | 0.33480700  |
| H  | -5.87786600 | 2.22393200  | 1.73473100  |
| C  | -5.15722200 | 2.88902400  | -1.61763600 |
| H  | -6.08568500 | 3.42904300  | -1.83750000 |
| H  | -4.34435700 | 3.37072700  | -2.17265700 |
| H  | -5.26775800 | 1.86910600  | -2.00152400 |
| C  | -5.16689900 | -4.41860100 | -0.66060700 |
| H  | -5.57628500 | -3.41570600 | -0.49954600 |
| H  | -5.96887700 | -5.04331800 | -1.07098300 |
| H  | -4.88413200 | -4.82608700 | 0.31631500  |
| C  | -4.39802300 | -3.82206400 | -2.99393600 |
| H  | -5.19429000 | -4.43908100 | -3.42632800 |
| H  | -4.78314200 | -2.80106000 | -2.90062800 |

|   |             |             |             |
|---|-------------|-------------|-------------|
| H | -3.56166100 | -3.80230600 | -3.70182400 |
| C | -3.49227400 | -5.85522200 | -1.84582700 |
| H | -2.64941100 | -5.91366900 | -2.54398500 |
| H | -3.19547400 | -6.33412100 | -0.90594400 |
| H | -4.31237800 | -6.44431700 | -2.27023900 |
| C | 1.21892000  | 5.66868900  | -2.82729300 |
| C | 1.09013500  | 4.29732800  | -2.80977300 |
| C | 1.58722200  | 3.53067600  | -1.71916300 |
| C | 2.22903500  | 4.21500600  | -0.63470100 |
| C | 2.34479500  | 5.62812200  | -0.68241600 |
| C | 1.85170800  | 6.34261300  | -1.75358600 |
| H | 0.98764100  | 1.60929300  | -2.49986100 |
| H | 0.83554800  | 6.24034900  | -3.66854200 |
| H | 0.60594400  | 3.77924500  | -3.63478000 |
| C | 1.47331100  | 2.11943900  | -1.66954500 |
| C | 2.72337500  | 3.43982500  | 0.45151400  |
| H | 2.83268500  | 6.14078200  | 0.14365400  |
| H | 1.94823300  | 7.42468700  | -1.77909000 |
| C | 2.60052400  | 2.07204400  | 0.47000100  |
| C | 1.96651000  | 1.37119600  | -0.60598000 |
| H | 3.20581900  | 3.95086600  | 1.28171400  |
| H | 2.97106800  | 1.51551200  | 1.32491800  |
| C | 1.81642400  | -0.08979300 | -0.60778900 |
| H | 1.33885600  | -0.49390900 | -1.49947100 |
| C | 2.56621600  | -0.97627600 | 0.17499000  |
| H | 3.09098000  | -0.66126400 | 1.06762000  |
| H | 2.42802100  | -2.04668500 | 0.06511000  |
| C | 6.51009300  | -3.15020700 | -1.98688500 |
| C | 5.72982600  | -2.16840400 | -2.87628000 |
| C | 4.39122500  | -1.75654500 | -2.21081400 |
| C | 4.63818400  | -1.23664400 | -0.82161500 |
| C | 5.39674400  | -2.16811100 | 0.08404300  |
| C | 6.73767500  | -2.58454000 | -0.57567500 |
| H | 3.87100000  | -1.01333100 | -2.82652200 |
| H | 6.33792000  | -1.26885700 | -3.04710000 |
| H | 5.53791600  | -2.61249200 | -3.86246900 |
| H | 5.94743900  | -4.09306800 | -1.91103500 |
| H | 7.47224800  | -3.39885200 | -2.45327900 |
| H | 4.89611600  | -0.17997700 | -0.74900300 |
| H | 5.58109300  | -1.71326000 | 1.06446000  |
| H | 4.80655700  | -3.08120700 | 0.26274700  |
| H | 7.39582600  | -1.70637200 | -0.63703700 |
| H | 7.25144100  | -3.32164200 | 0.05564800  |
| H | 3.74465500  | -2.64829700 | -2.16729900 |

### TS7'-t

|    |             |             |             |
|----|-------------|-------------|-------------|
| Ni | -0.25626300 | -1.35195800 | 0.08655100  |
| I  | -0.53049000 | -1.78741000 | -2.60302500 |
| C  | 3.18052500  | -1.33421400 | 4.24948900  |
| C  | 1.95241500  | -0.43966300 | 4.48488300  |
| C  | 0.95262000  | -0.54182900 | 3.30441000  |
| C  | 0.58427200  | -1.98990200 | 3.06684900  |
| C  | 1.77247700  | -2.88836200 | 2.80408300  |
| C  | 2.77893900  | -2.79355000 | 3.97885900  |
| H  | 0.06255000  | 0.06562300  | 3.51359900  |
| H  | 1.44941600  | -0.74923200 | 5.41237100  |
| H  | 2.26161700  | 0.60519900  | 4.62798600  |
| H  | 3.74439100  | -0.95021200 | 3.38557100  |
| H  | 3.85865100  | -1.28176400 | 5.11137800  |
| H  | -0.01593200 | -2.37934800 | 3.89364100  |
| H  | 1.45835600  | -3.93219400 | 2.66887100  |
| H  | 2.28934500  | -2.58514800 | 1.88627100  |
| H  | 2.31829700  | -3.21716800 | 4.88290600  |

|   |             |             |             |   |            |             |             |
|---|-------------|-------------|-------------|---|------------|-------------|-------------|
| H | 3.66833800  | -3.40203800 | 3.76415500  | C | 6.65499300 | -0.82712800 | -1.93270200 |
| H | 1.42969700  | -0.11559700 | 2.41441500  | H | 6.84598300 | -1.46090500 | -1.05910500 |
| C | -7.00620200 | 0.38976200  | -1.77626600 | H | 6.25436800 | -1.45669500 | -2.73501200 |
| C | -5.87346600 | -0.39207600 | -1.73895700 | H | 7.61989800 | -0.43577100 | -2.27256400 |
| C | -5.10976700 | -0.51520100 | -0.54355100 |   |            |             |             |
| C | -5.54416400 | 0.19757000  | 0.62275300  |   |            |             |             |
| C | -6.71713300 | 0.99384900  | 0.55214200  |   |            |             |             |
| C | -7.43522100 | 1.08945000  | -0.62006200 |   |            |             |             |
| H | -3.61477600 | -1.83590300 | -1.37183800 |   |            |             |             |
| H | -7.57829400 | 0.47354200  | -2.69666300 |   |            |             |             |
| H | -5.54187400 | -0.92749400 | -2.62520700 |   |            |             |             |
| C | -3.94219400 | -1.31380100 | -0.47648000 |   |            |             |             |
| C | -4.76845400 | 0.07152500  | 1.80653000  |   |            |             |             |
| H | -7.04208300 | 1.52797100  | 1.44283000  |   |            |             |             |
| H | -8.33293100 | 1.70063400  | -0.66268700 |   |            |             |             |
| C | -3.63598800 | -0.70916300 | 1.83913100  |   |            |             |             |
| C | -3.18988100 | -1.43355400 | 0.68796700  |   |            |             |             |
| H | -5.08827500 | 0.60192400  | 2.70155200  |   |            |             |             |
| H | -3.07317700 | -0.77395900 | 2.76597700  |   |            |             |             |
| C | -2.00018300 | -2.30853100 | 0.71101200  |   |            |             |             |
| H | -1.96395900 | -3.03124300 | -0.10265300 |   |            |             |             |
| C | -1.31539900 | -2.66555000 | 1.90405400  |   |            |             |             |
| H | -1.75021600 | -2.34645500 | 2.84291600  |   |            |             |             |
| H | -0.85213800 | -3.64741300 | 1.93666600  |   |            |             |             |
| C | 0.98535200  | 1.28975000  | 0.02444500  |   |            |             |             |
| C | -1.26305500 | 1.49822300  | 0.52036200  |   |            |             |             |
| C | -1.17597200 | 2.88790900  | 0.56263800  |   |            |             |             |
| C | 0.05179300  | 3.51908100  | 0.33857300  |   |            |             |             |
| C | 1.13893800  | 2.67582600  | 0.06716700  |   |            |             |             |
| C | 2.09211500  | 0.35809200  | -0.31186300 |   |            |             |             |
| C | 2.72037600  | -1.84761600 | -0.56876500 |   |            |             |             |
| C | 3.99330100  | -1.49239000 | -1.00388100 |   |            |             |             |
| C | 4.34045500  | -0.13991200 | -1.10761500 |   |            |             |             |
| C | 3.34700400  | 0.78326500  | -0.75334700 |   |            |             |             |
| H | -2.20752900 | 0.99695600  | 0.69443900  |   |            |             |             |
| H | -2.07645300 | 3.45212900  | 0.77062900  |   |            |             |             |
| H | 2.11618100  | 3.10666600  | -0.11278100 |   |            |             |             |
| H | 2.42425800  | -2.89028800 | -0.51624000 |   |            |             |             |
| H | 4.68855700  | -2.27903900 | -1.26900200 |   |            |             |             |
| H | 3.54826200  | 1.84354000  | -0.84456700 |   |            |             |             |
| N | 1.79080700  | -0.95503000 | -0.21175300 |   |            |             |             |
| N | -0.21386600 | 0.70763600  | 0.26726100  |   |            |             |             |
| C | 0.23938200  | 5.04296300  | 0.37357100  |   |            |             |             |
| C | 5.71298800  | 0.34480200  | -1.59788900 |   |            |             |             |
| C | -1.07700700 | 5.78092900  | 0.68215200  |   |            |             |             |
| H | -0.89650300 | 6.86117000  | 0.69694300  |   |            |             |             |
| H | -1.84263400 | 5.58520700  | -0.07684600 |   |            |             |             |
| H | -1.48267300 | 5.50135000  | 1.66108200  |   |            |             |             |
| C | 0.75755400  | 5.52293900  | -1.00382100 |   |            |             |             |
| H | 0.89568800  | 6.61037400  | -0.99386800 |   |            |             |             |
| H | 1.71997000  | 5.06834400  | -1.26189700 |   |            |             |             |
| H | 0.04638500  | 5.27730400  | -1.80013800 |   |            |             |             |
| C | 1.27136000  | 5.40361100  | 1.46925100  |   |            |             |             |
| H | 1.41865200  | 6.48934700  | 1.50262700  |   |            |             |             |
| H | 0.92831600  | 5.07707300  | 2.45747700  |   |            |             |             |
| H | 2.24698200  | 4.94202900  | 1.28285900  |   |            |             |             |
| C | 5.52305500  | 1.19913800  | -2.87470700 |   |            |             |             |
| H | 4.89957300  | 2.08044400  | -2.69044900 |   |            |             |             |
| H | 6.49588600  | 1.55016200  | -3.23831800 |   |            |             |             |
| H | 5.05061200  | 0.61582800  | -3.67250700 |   |            |             |             |
| C | 6.37462000  | 1.20372100  | -0.49341800 |   |            |             |             |
| H | 7.35352900  | 1.56184700  | -0.83265300 |   |            |             |             |
| H | 5.77054600  | 2.08113700  | -0.23869900 |   |            |             |             |
| H | 6.52516500  | 0.62163200  | 0.42286800  |   |            |             |             |
